# Supplementary material
Source: PubMed Central journal article supplement (PMC8511083)
Supplement: NIHMS1731506-supplement-1.pdf [file NIHMS1731506-supplement-1.pdf]

# Synthesis and Biological Evaluation of Selective Survivin Inhibitors Derived from the MX 106 Scaffold

Najah Albadari <sup>a,1</sup>, Shanshan Deng <sup>a,1</sup>, Hao Chen <sup>a</sup>, Guannan Zhao <sup>b</sup>, Junming Yue <sup>b</sup>, Sicheng Zhang <sup>a</sup>, Duane D. Miller <sup>a</sup>, Zhongzhi Wu <sup>a,\*</sup>, and Wei Li <sup>a,\*</sup>

## Affiliation:

<sup>a</sup> Department of Pharmaceutical Sciences, College of Pharmacy, University of Tennessee Health Science Center, Memphis, Tennessee 38163, United States

<sup>b</sup> Department of Pathology and Laboratory Medicine, Center for Cancer Research, University of Tennessee Health Science Center, Memphis, Tennessee 38163, United States

Supporting Information

## Contents

### Experimental.

1. Spectral data for the synthetic intermediates and all the final compounds. **S2-S67**
2. **Supplementary Figure S1:** Labeled thermal ellipsoid plot for **12b**. **S68**
3. **Table S1:** Chemical and crystal data for **12b**. **S69**
4. **Table S2:** Data collection, structure solution, and refinement for **12b**. **S70**

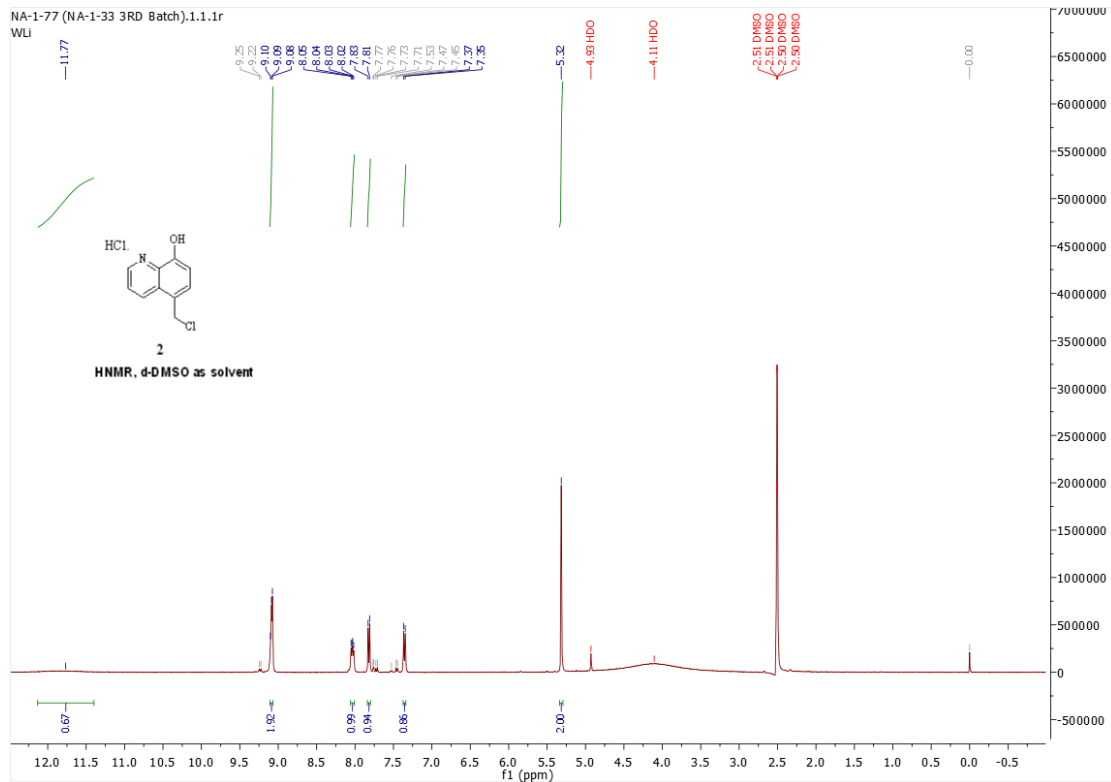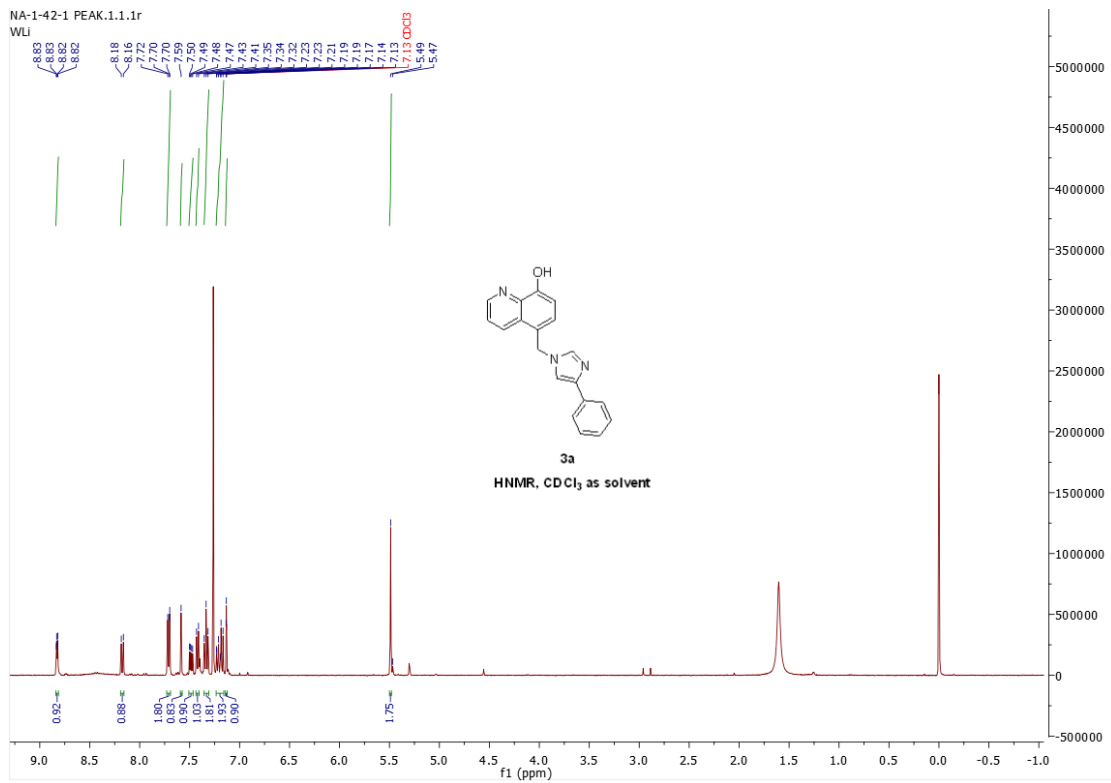

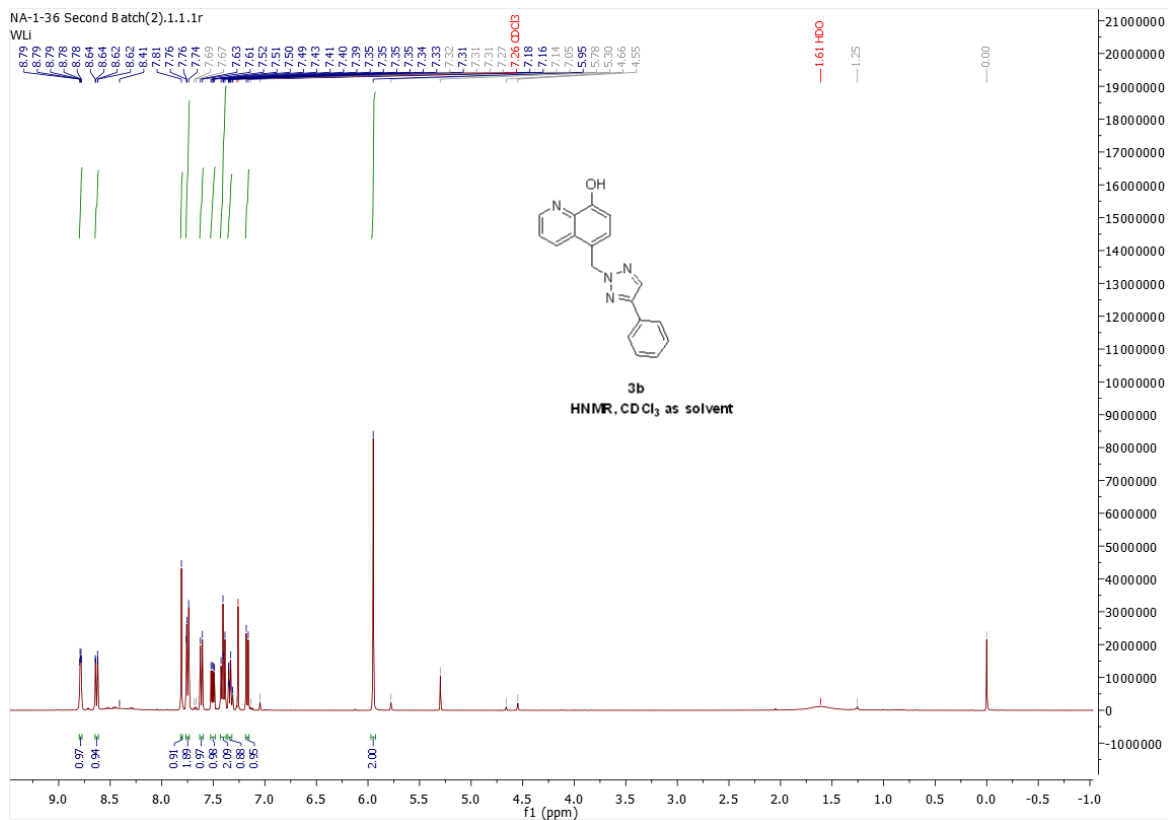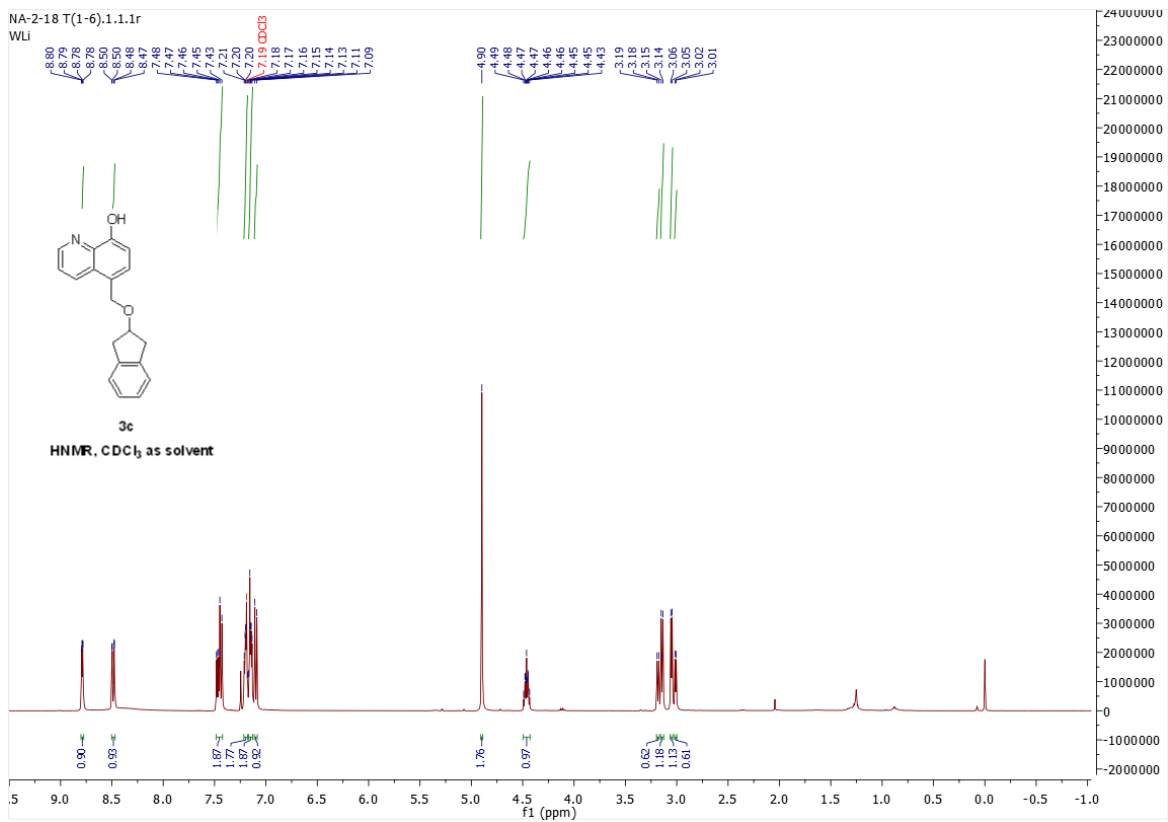

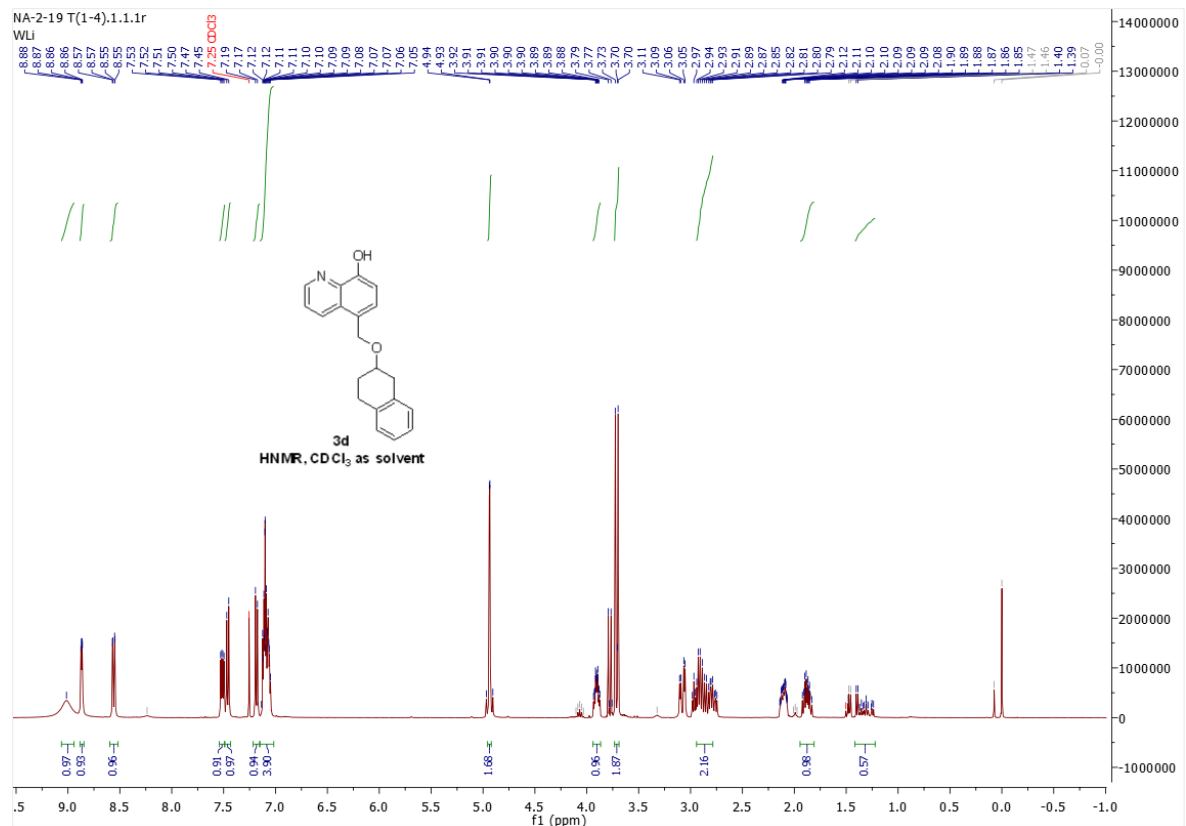

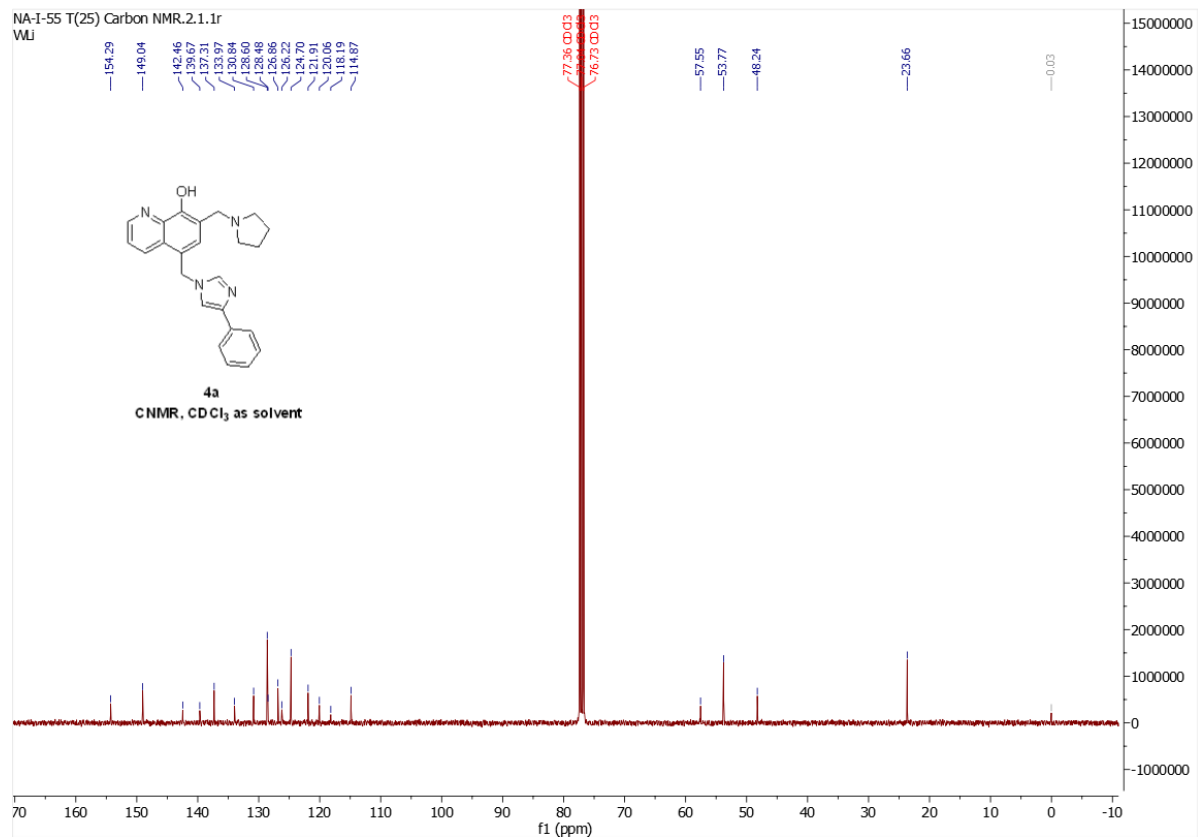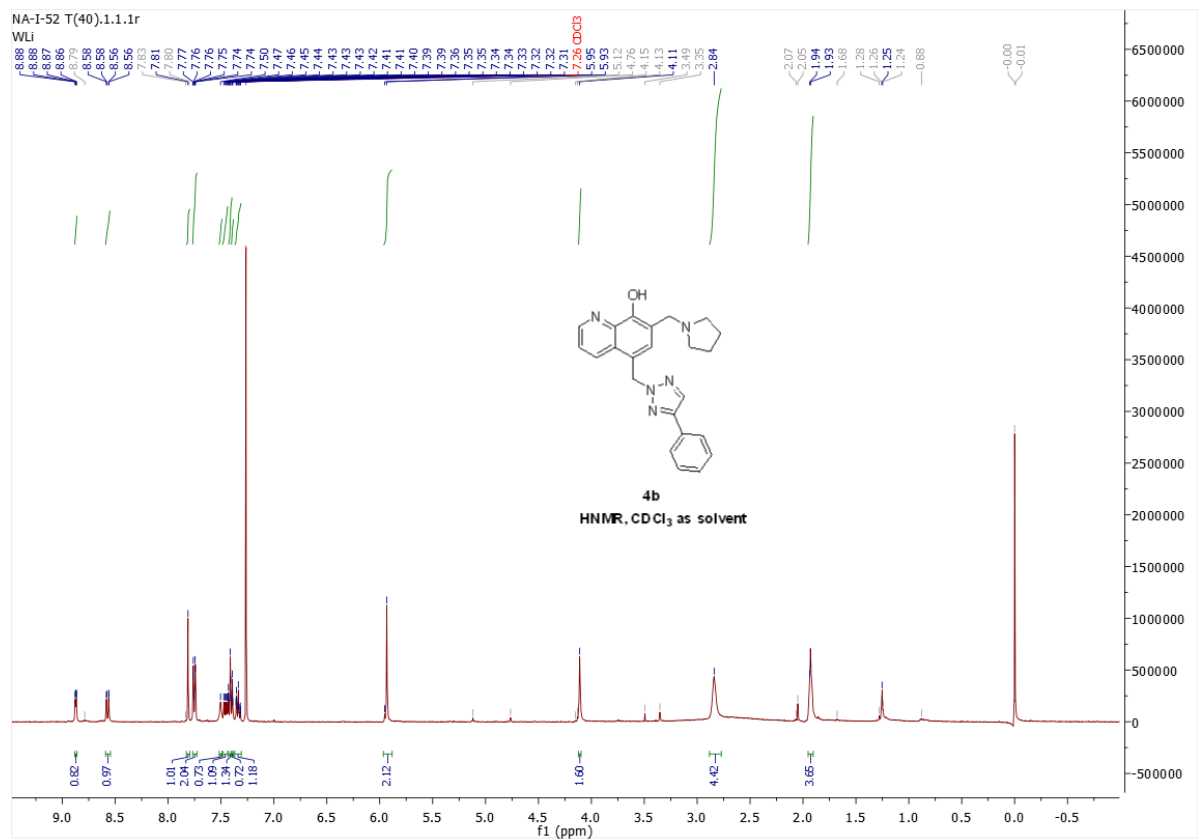



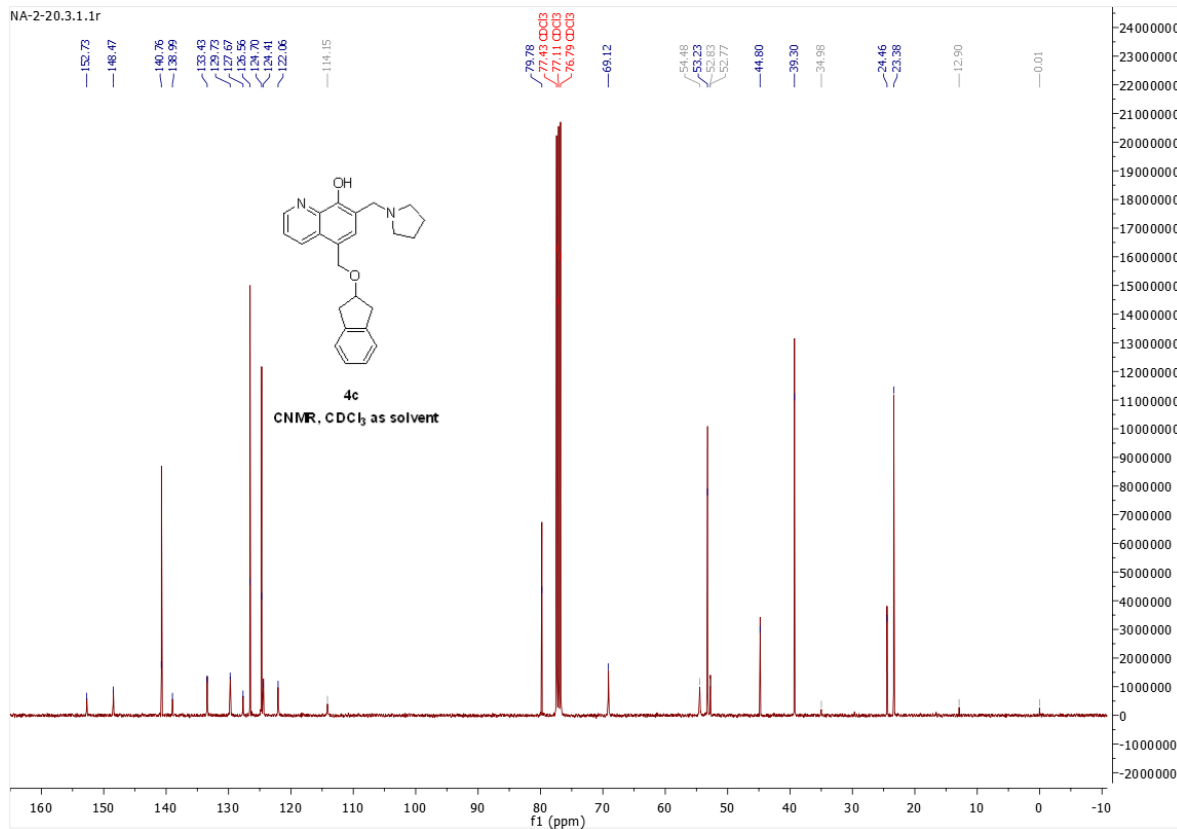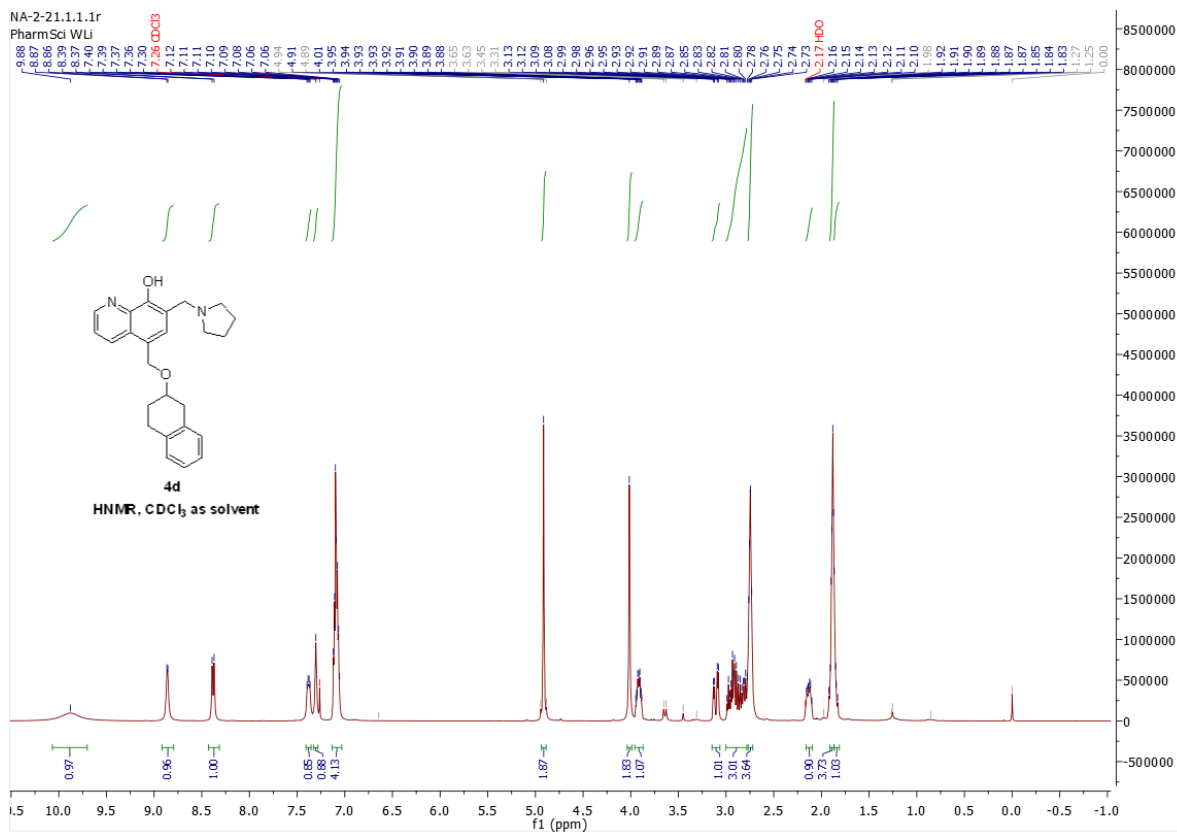

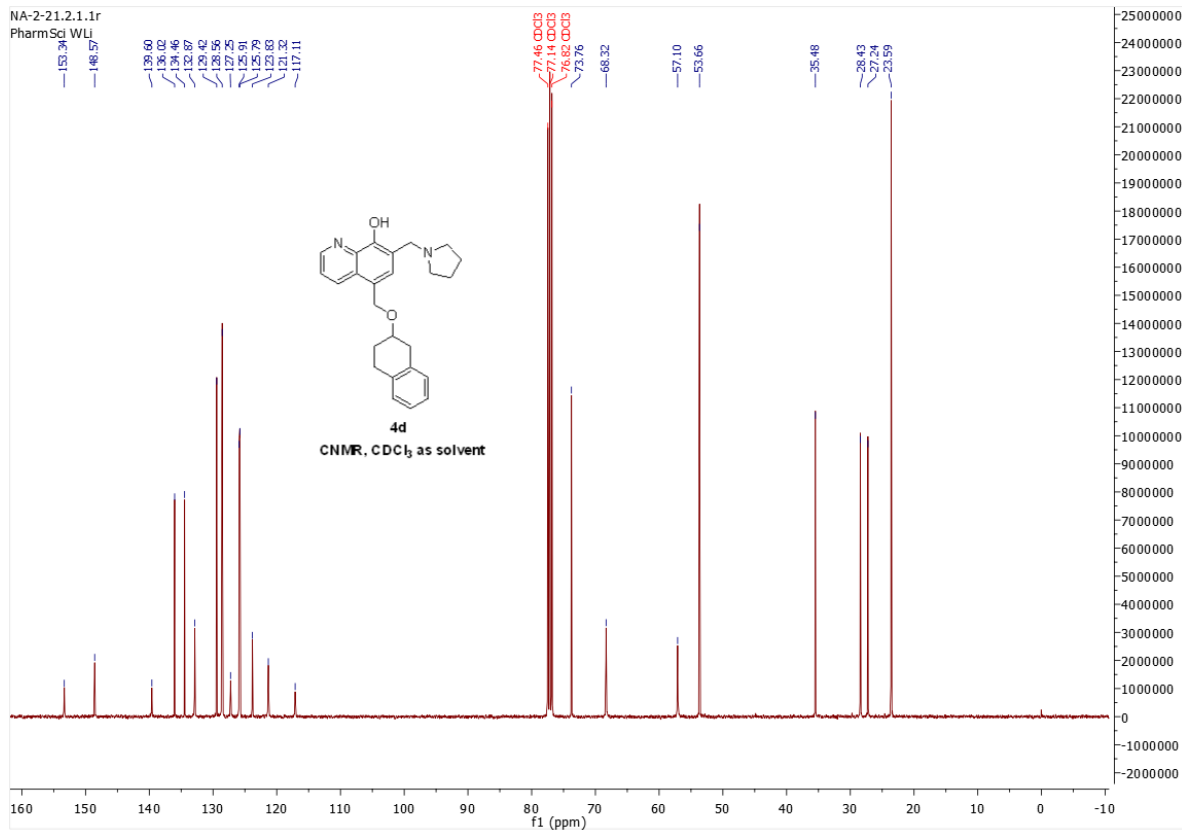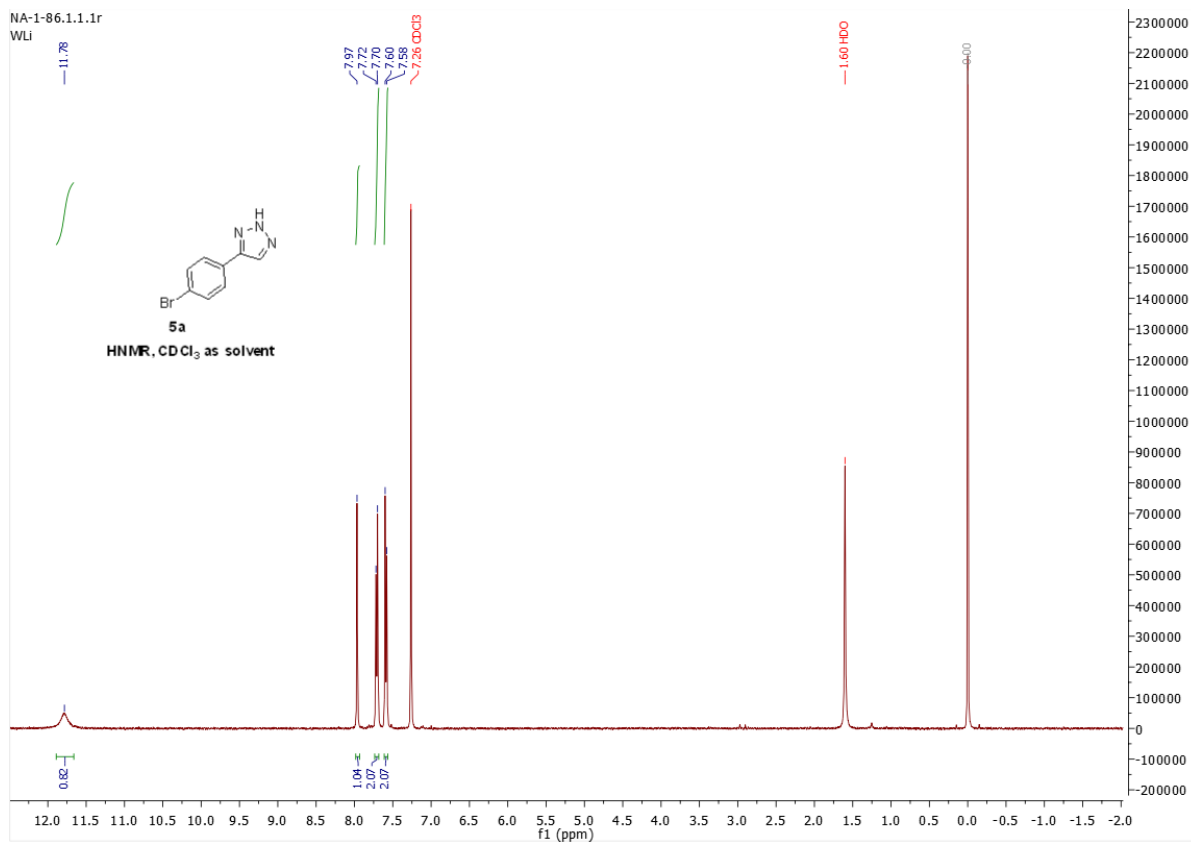



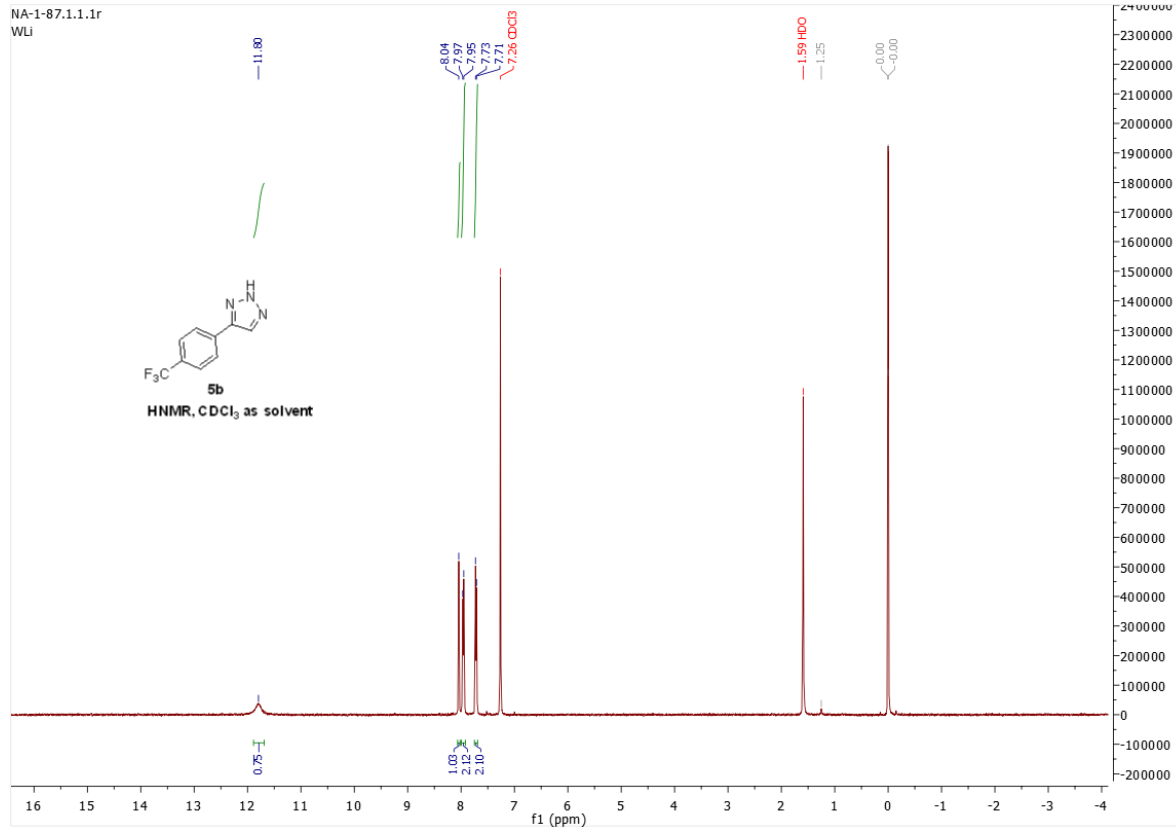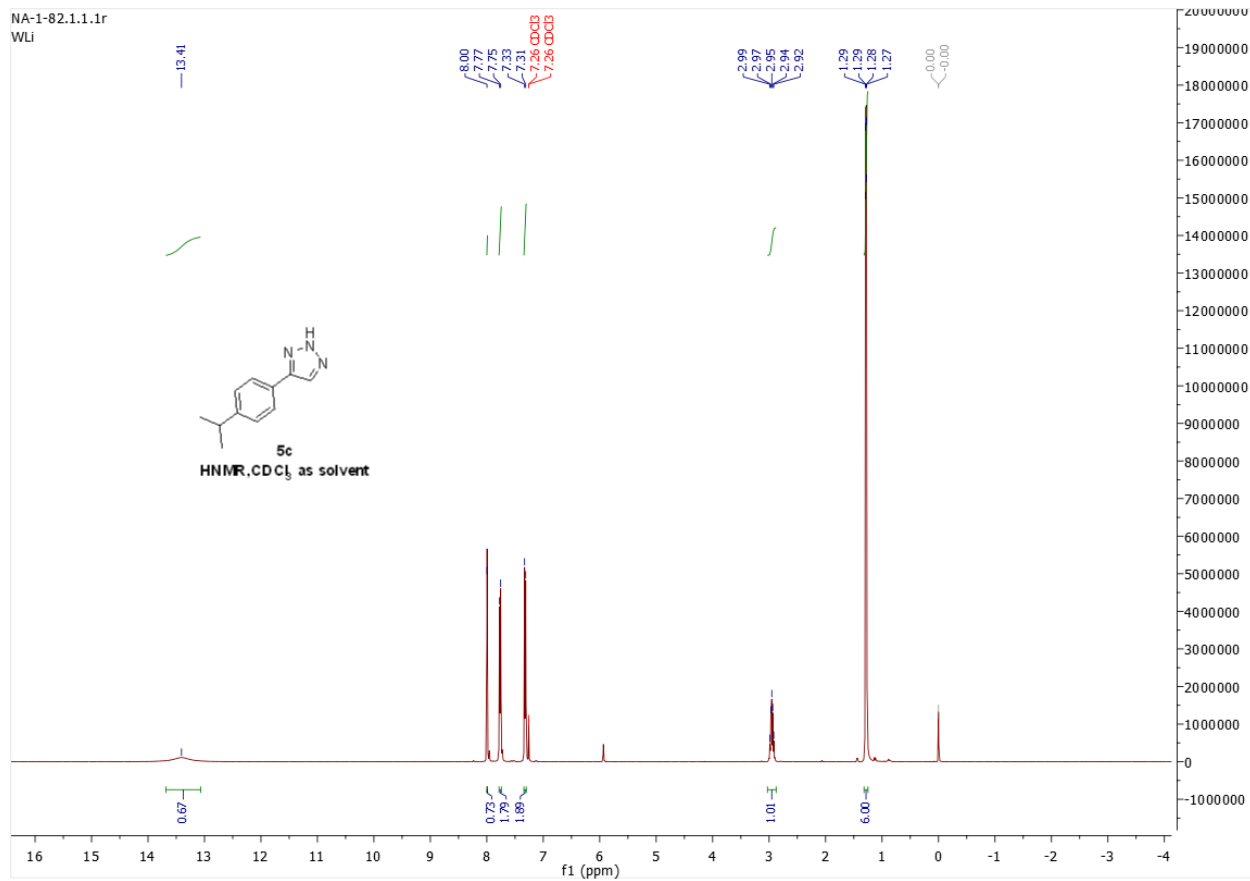

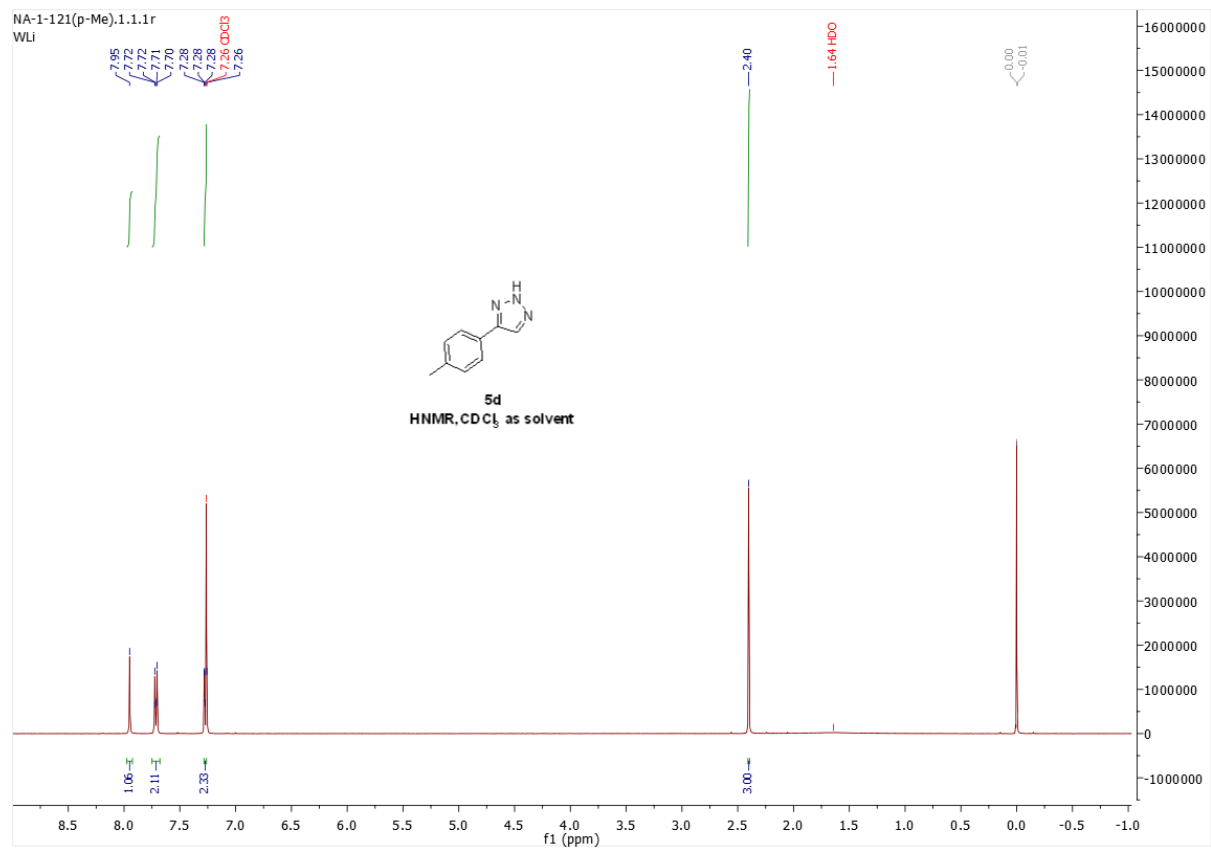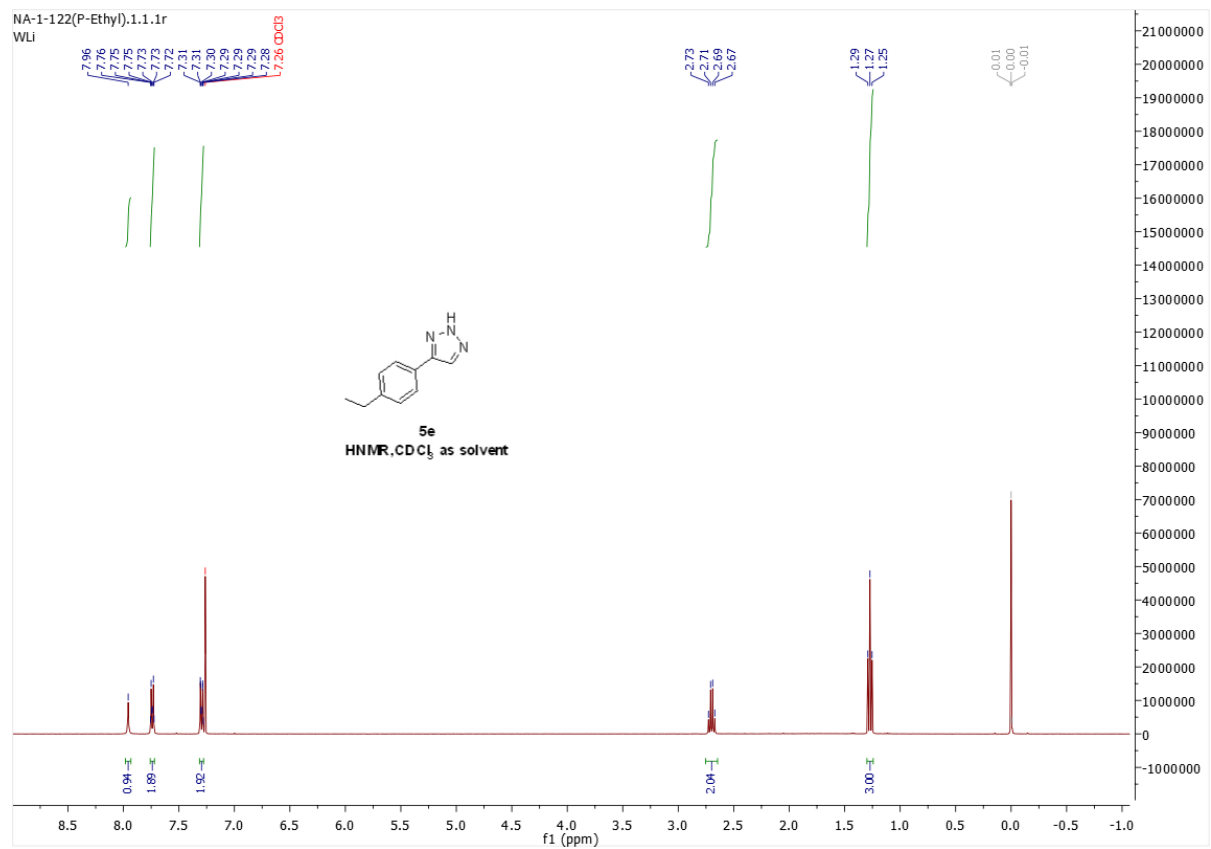

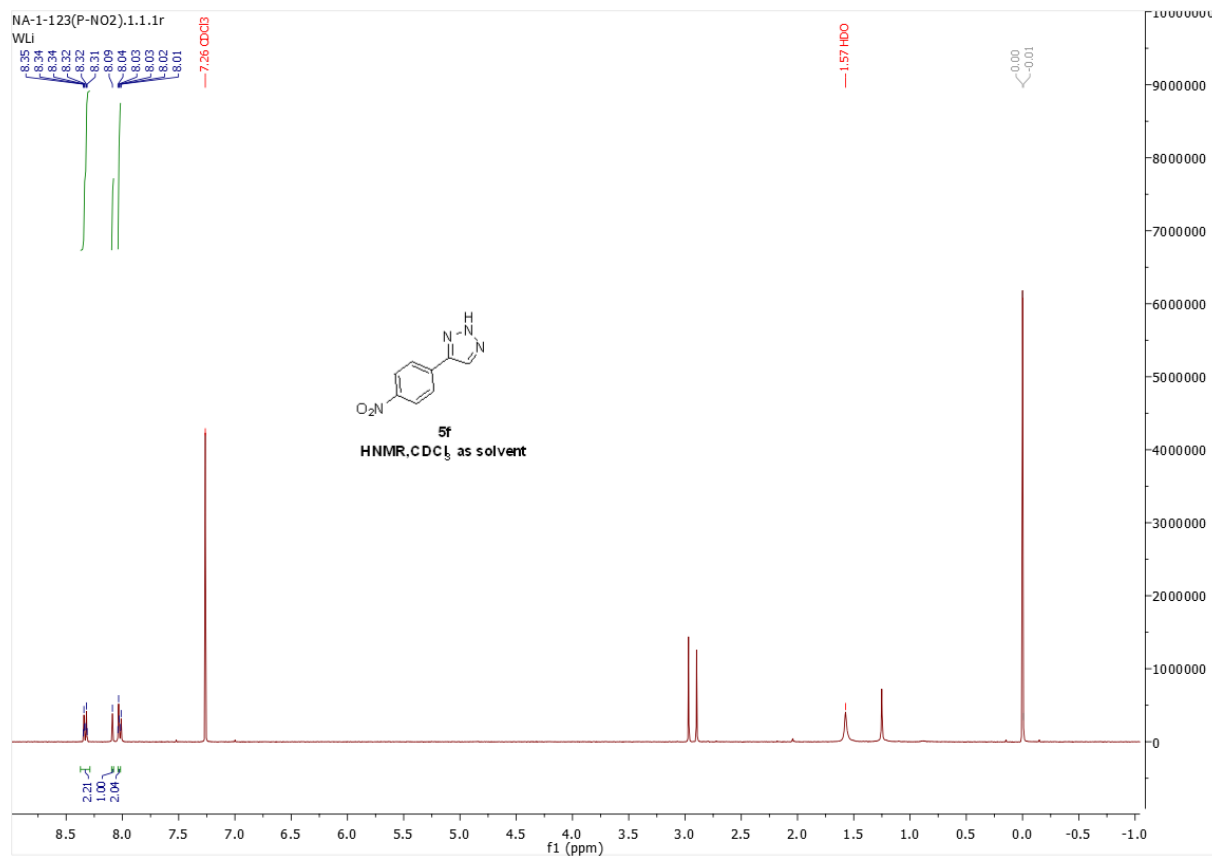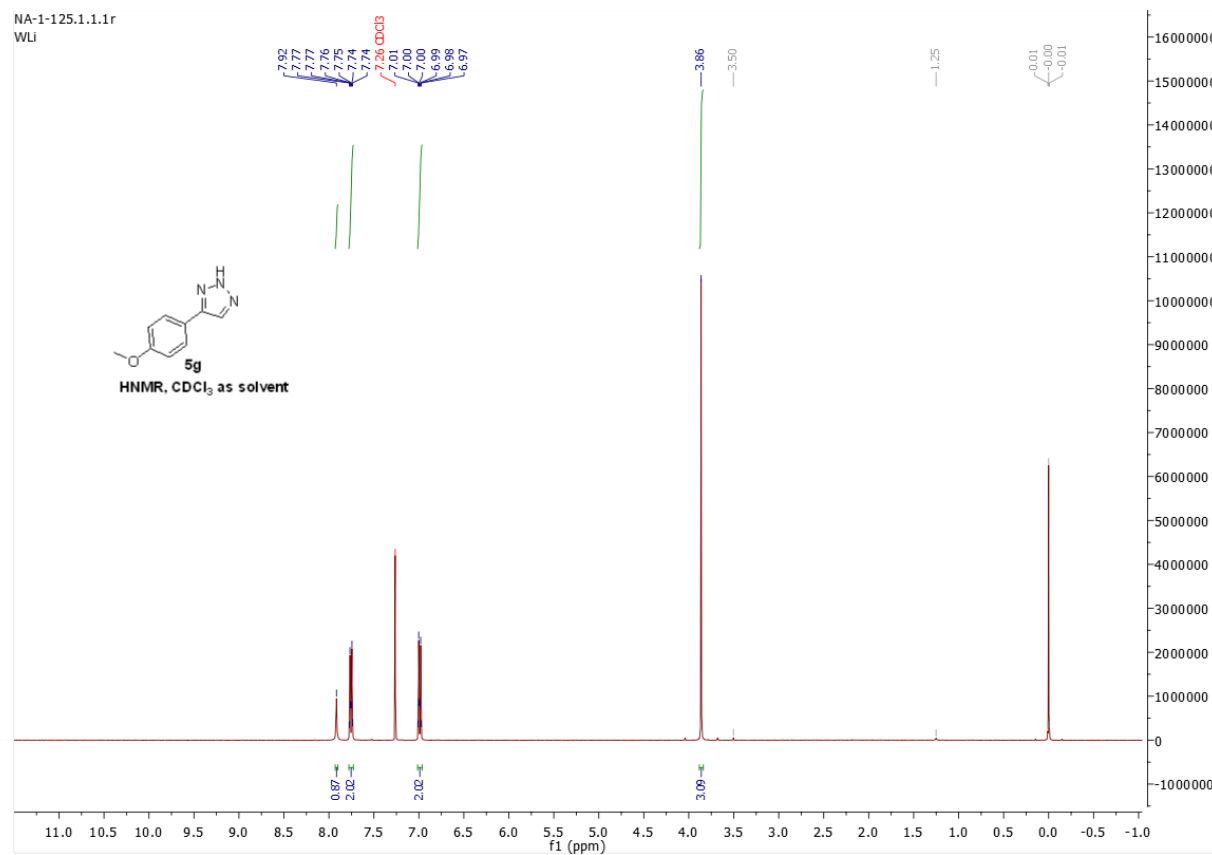

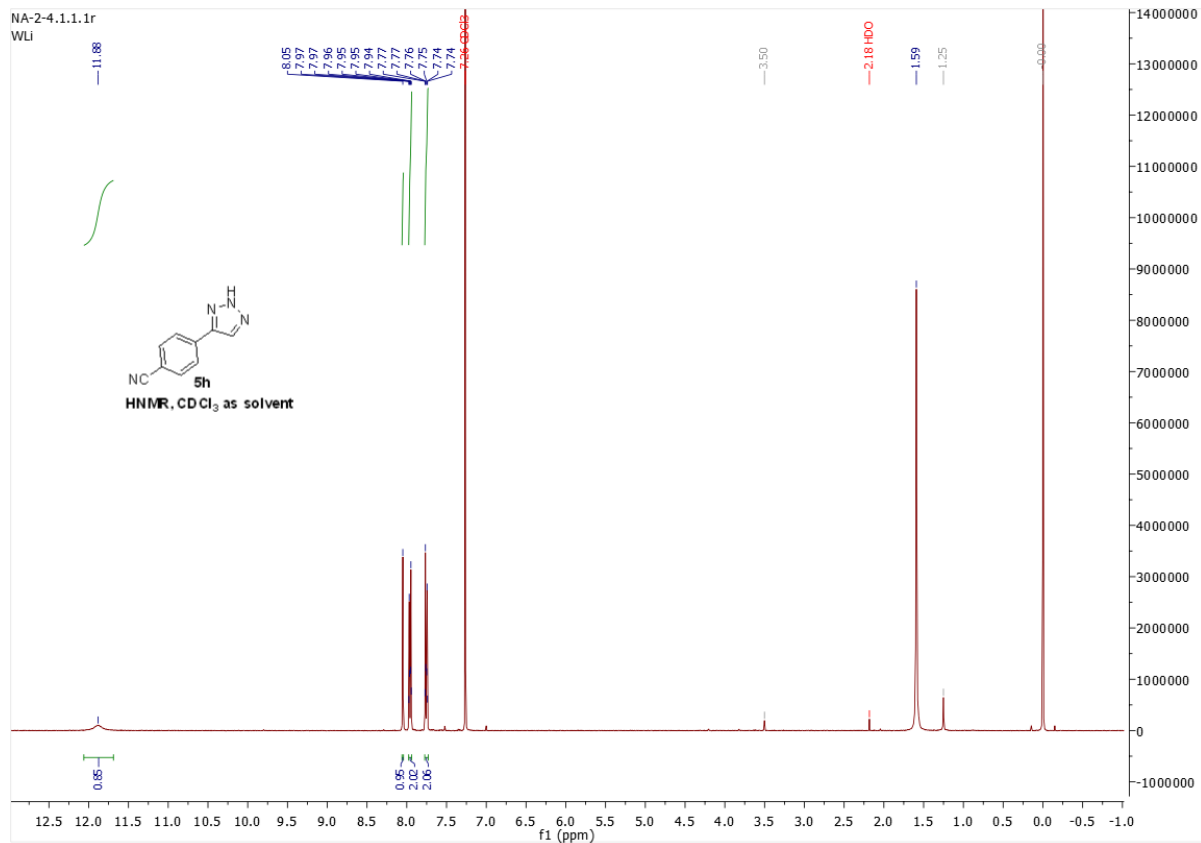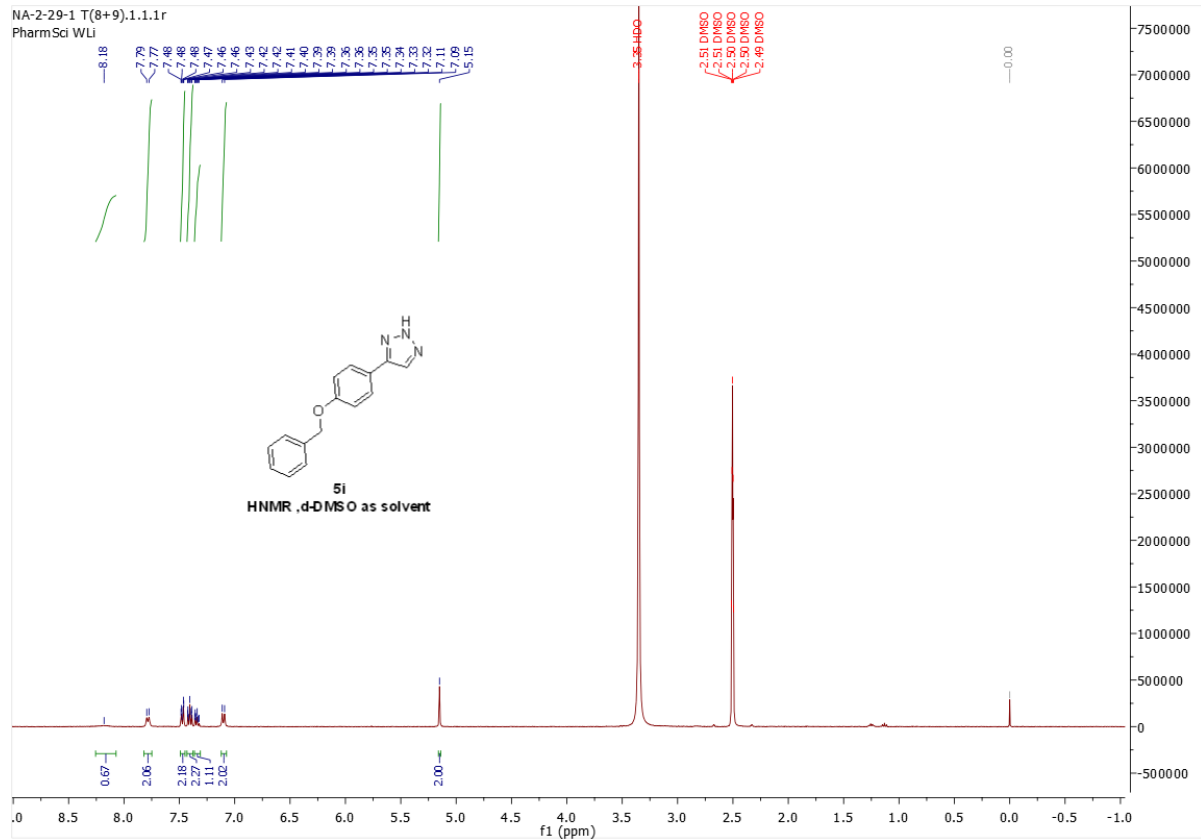

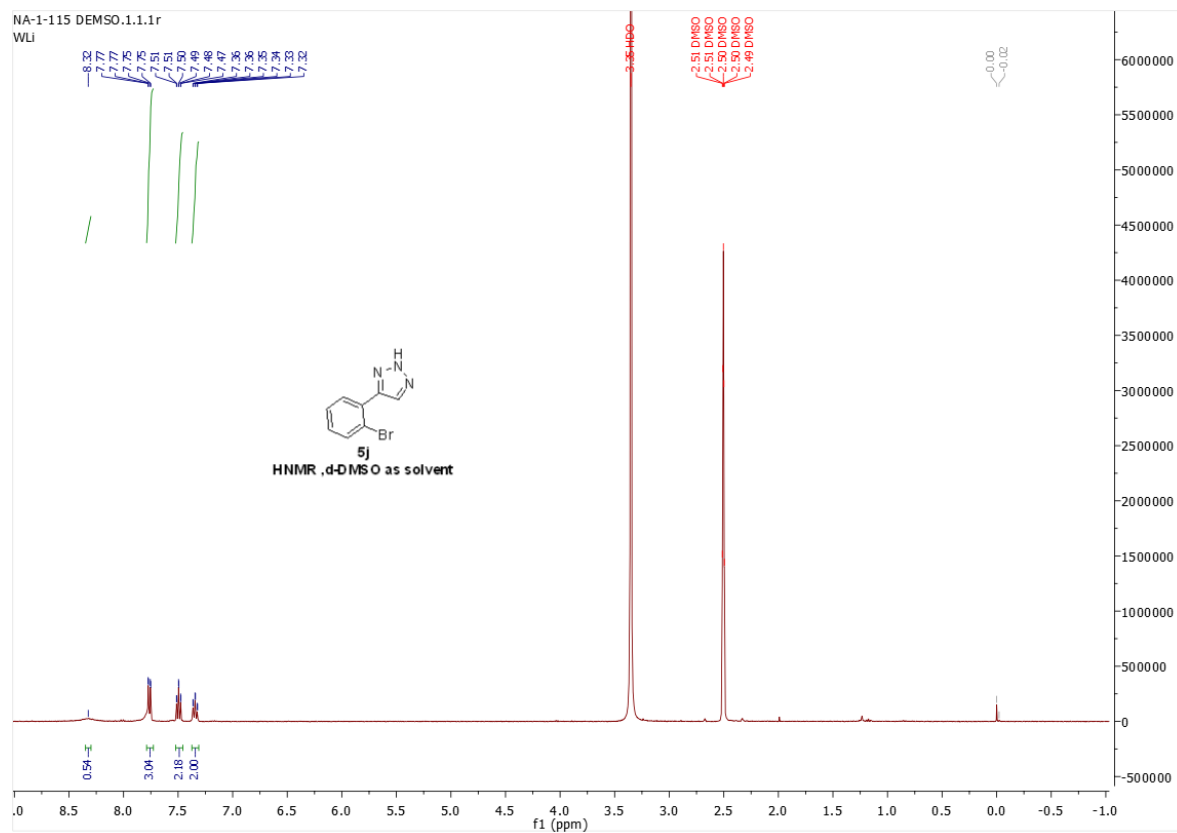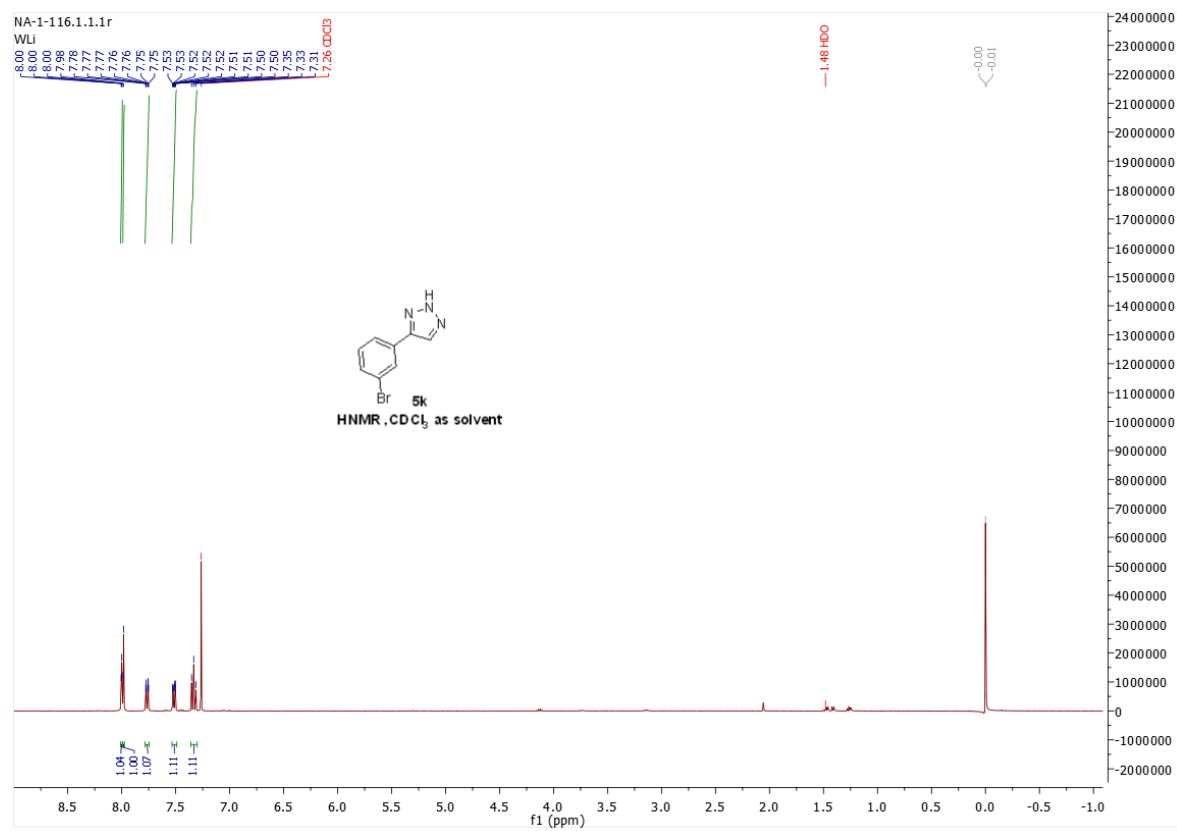

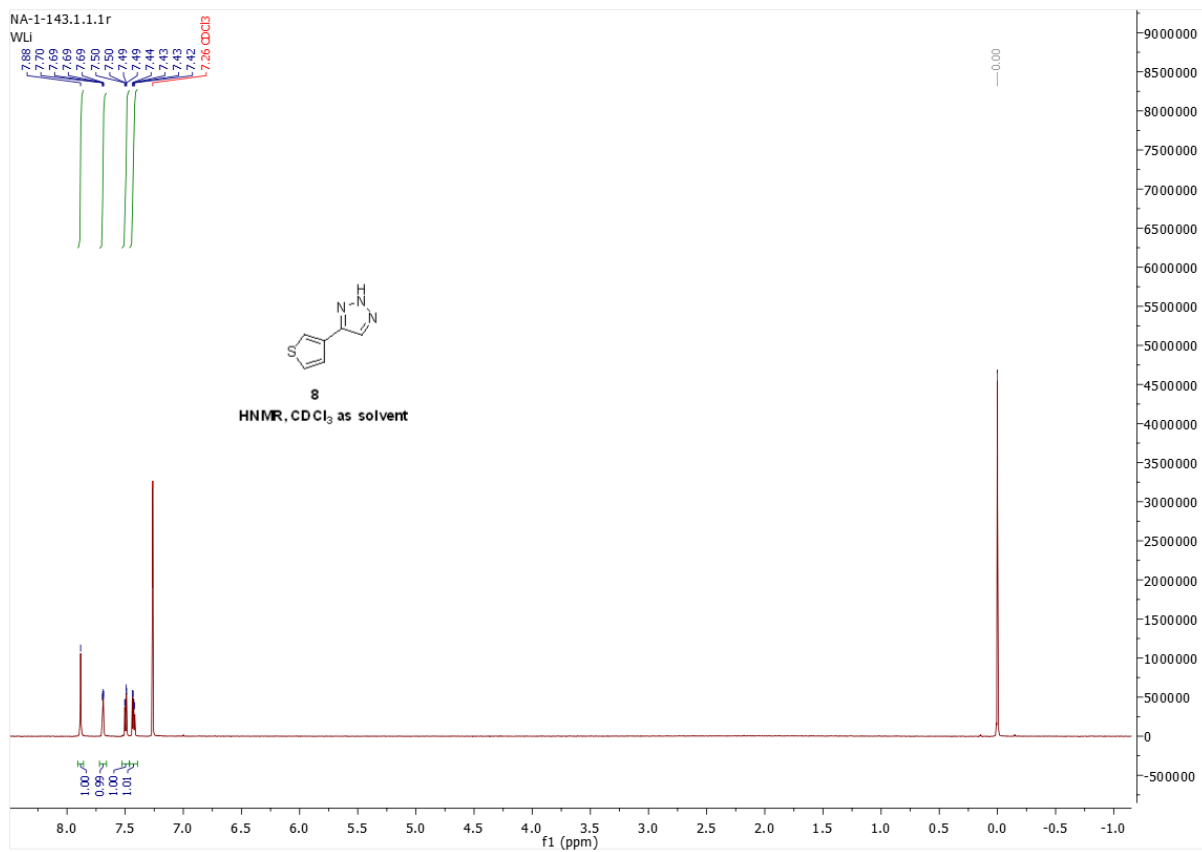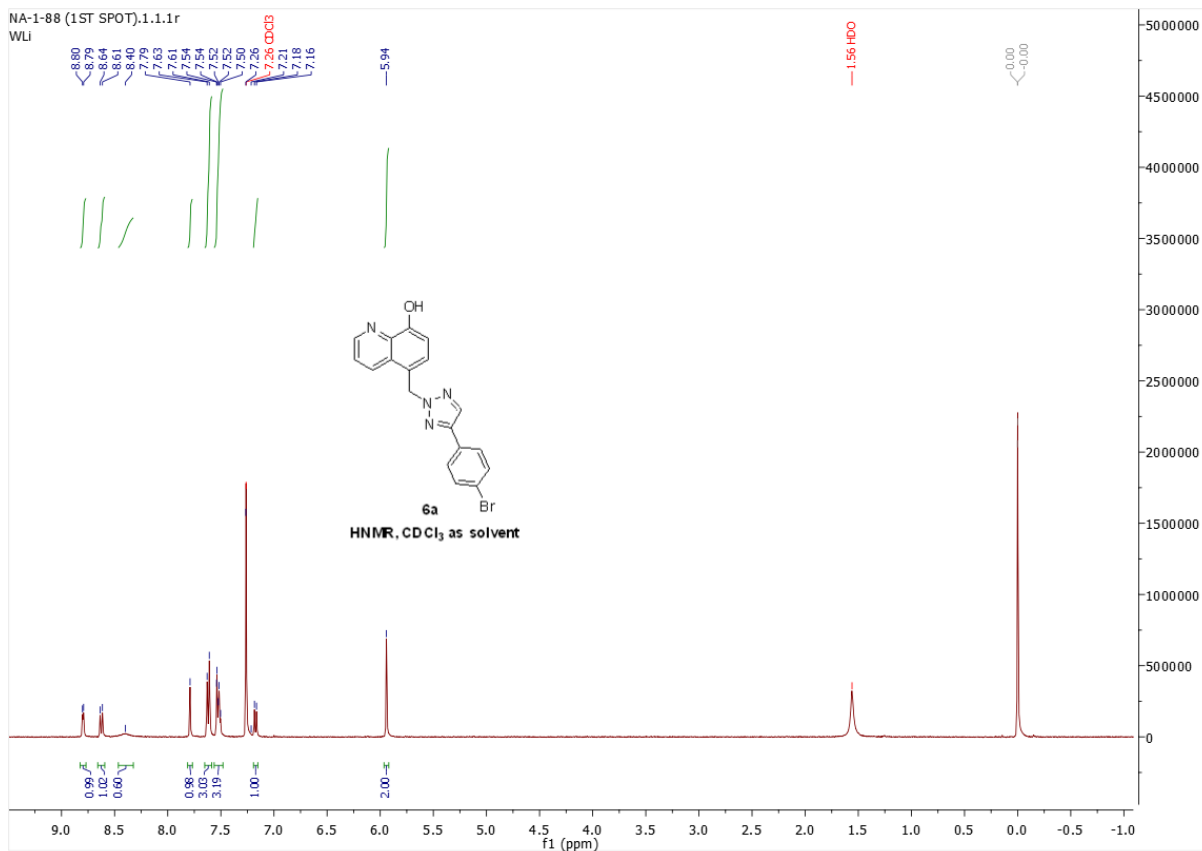

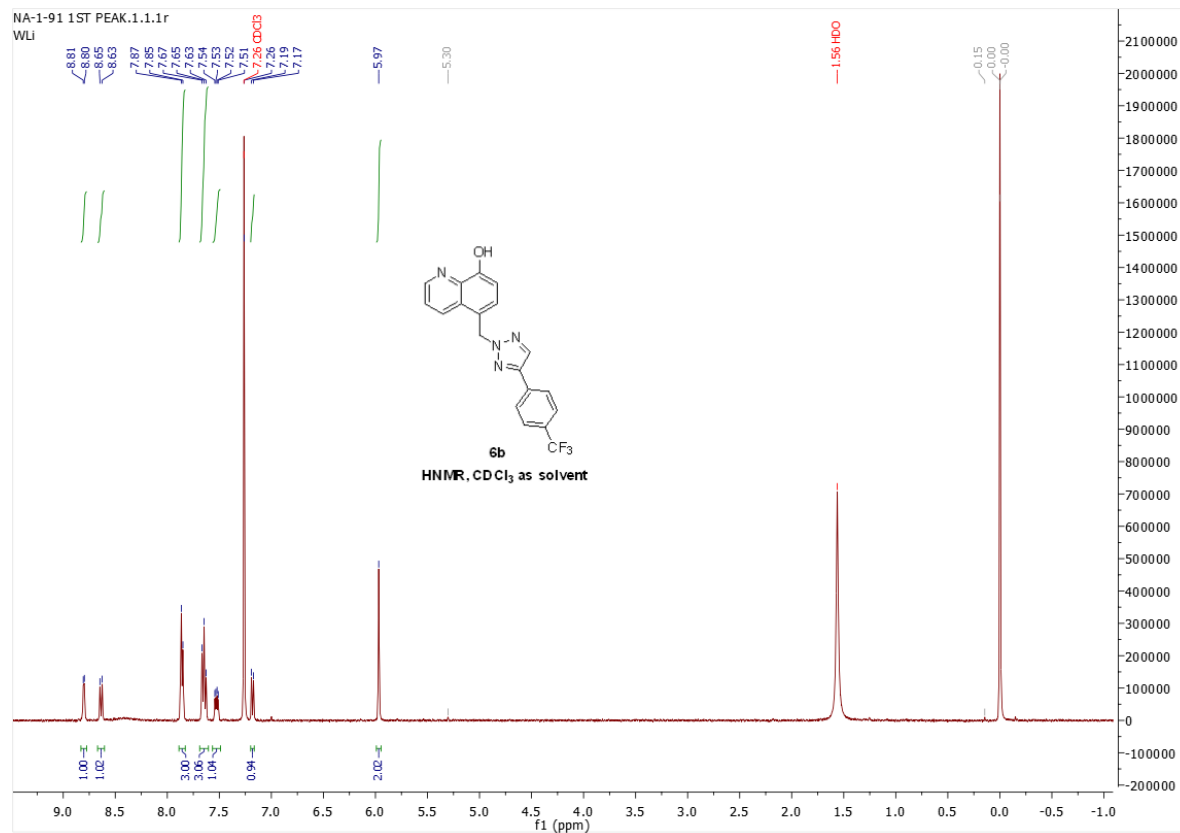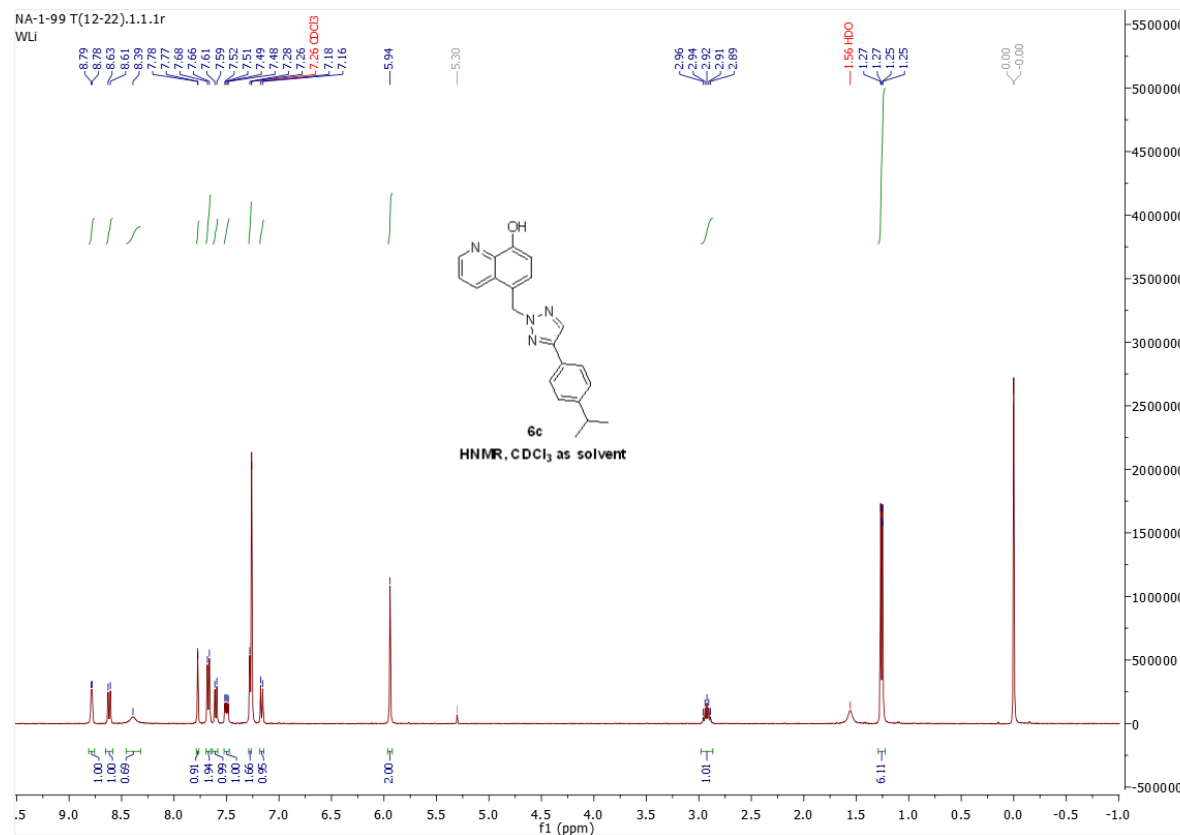

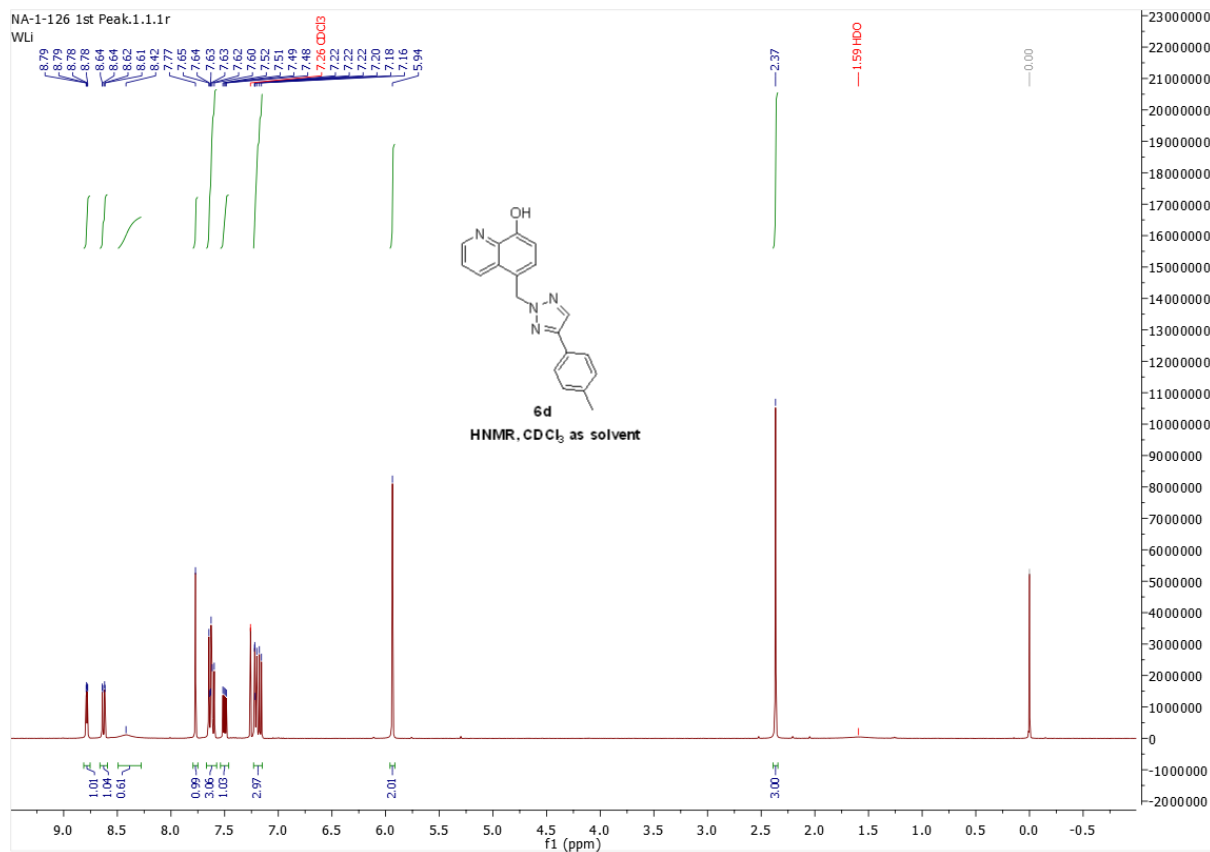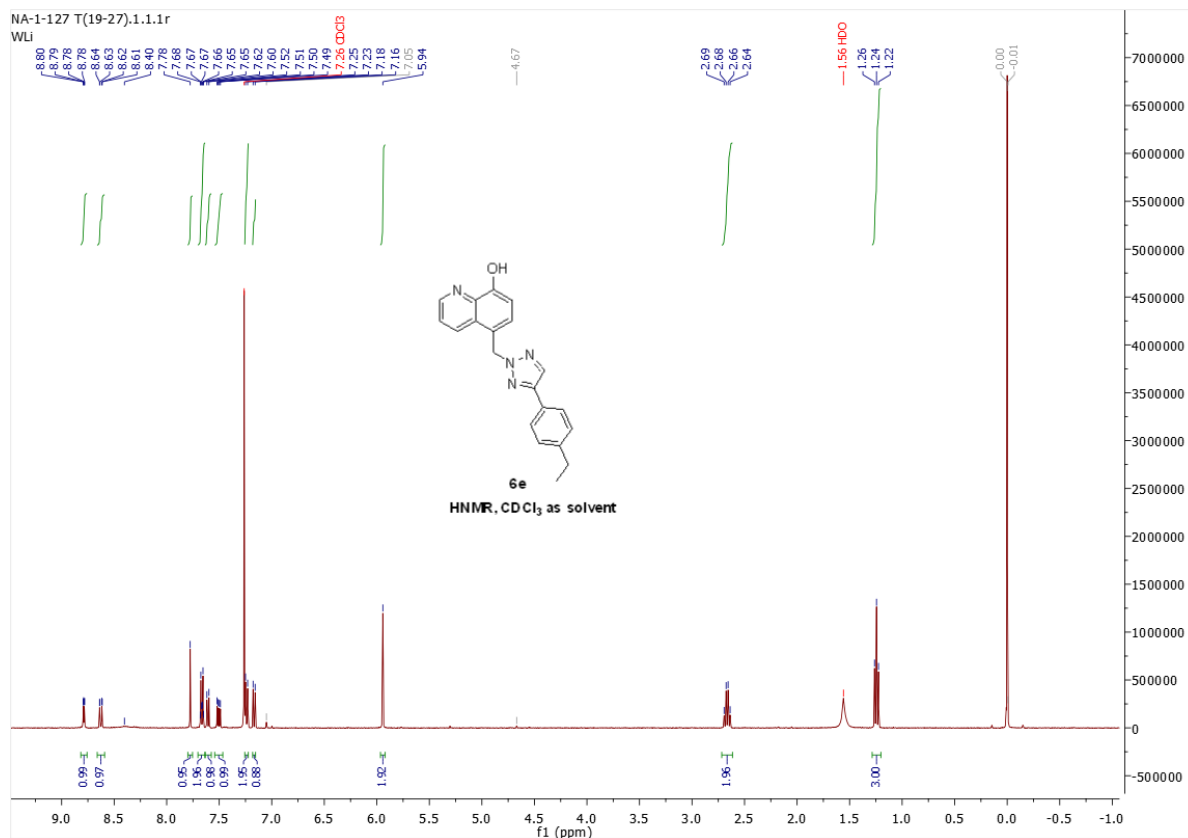



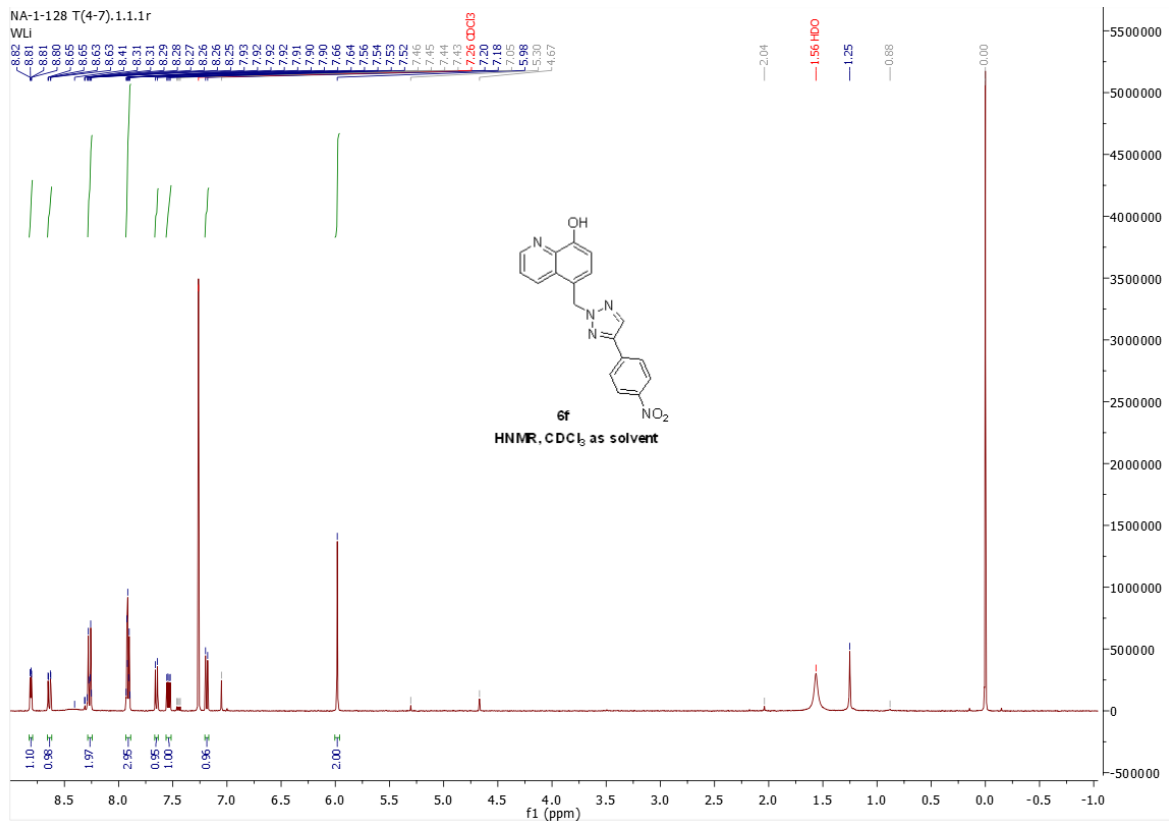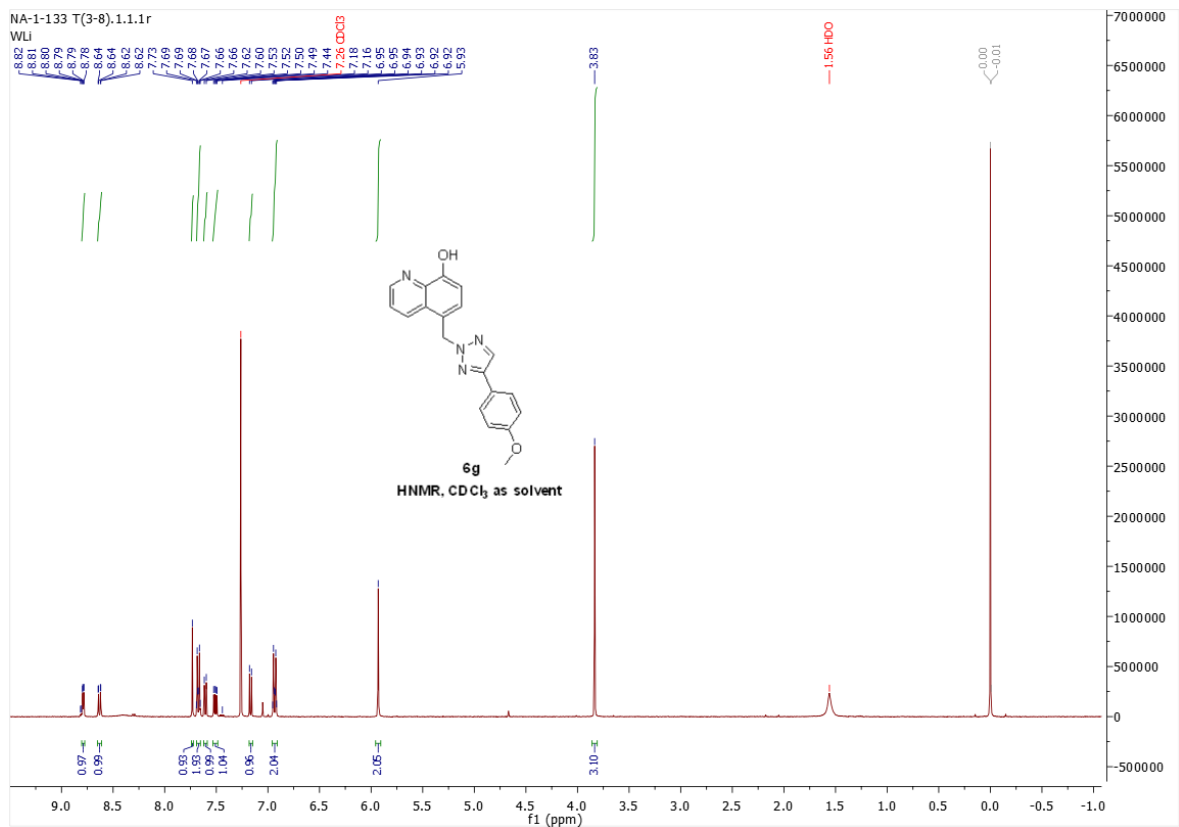

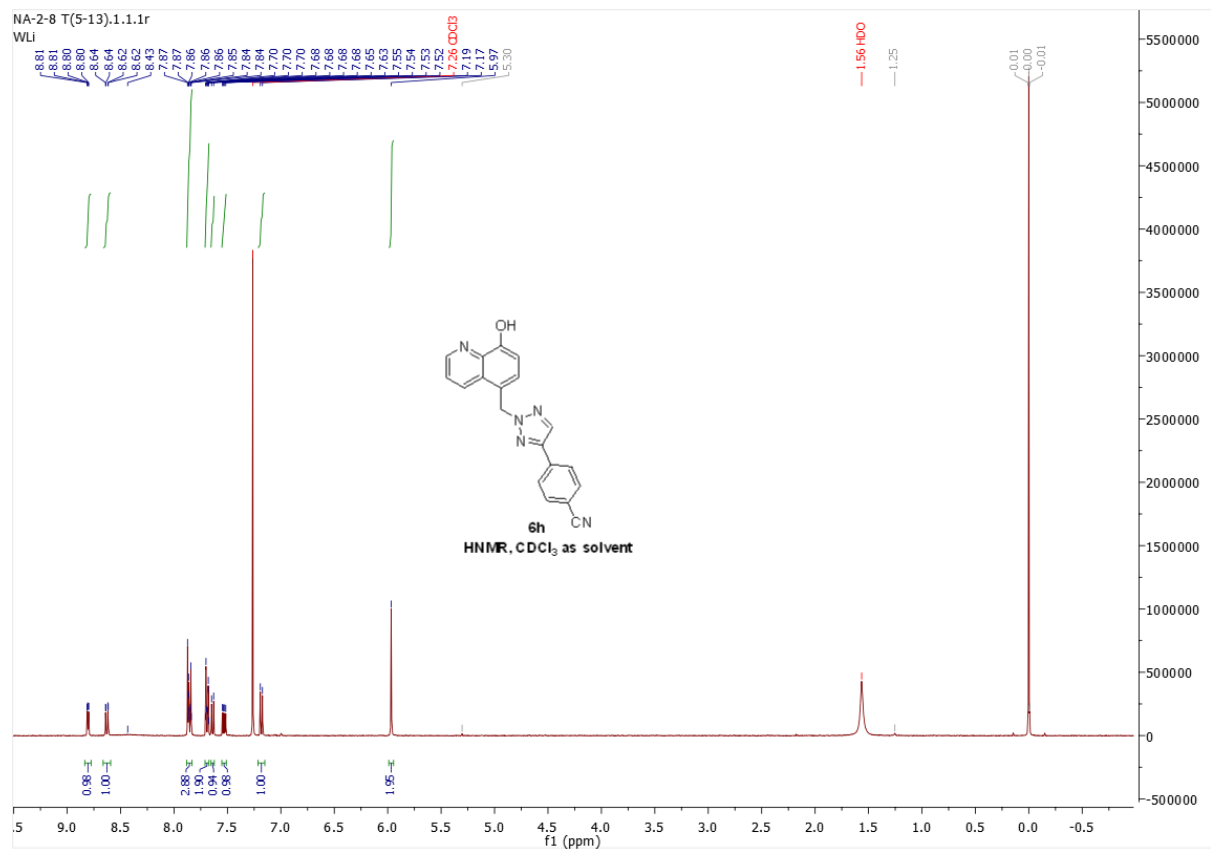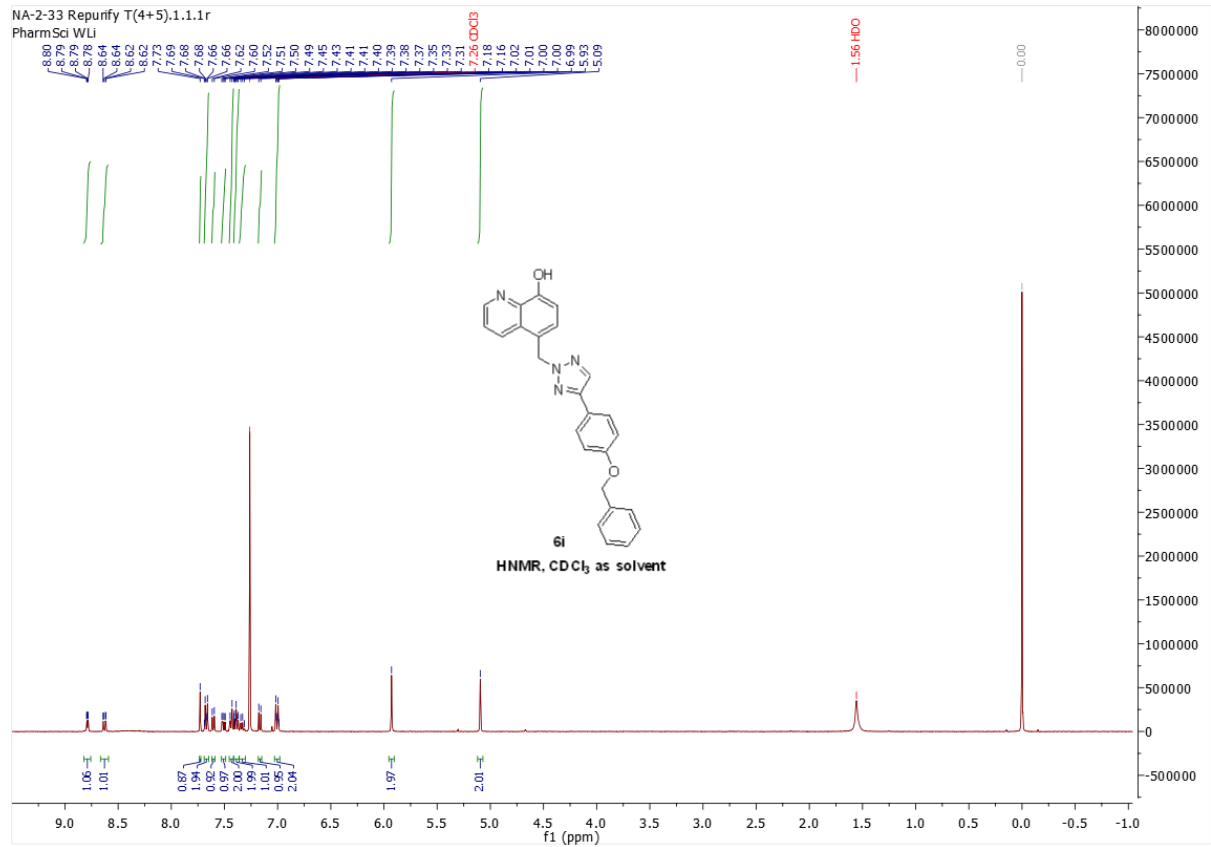

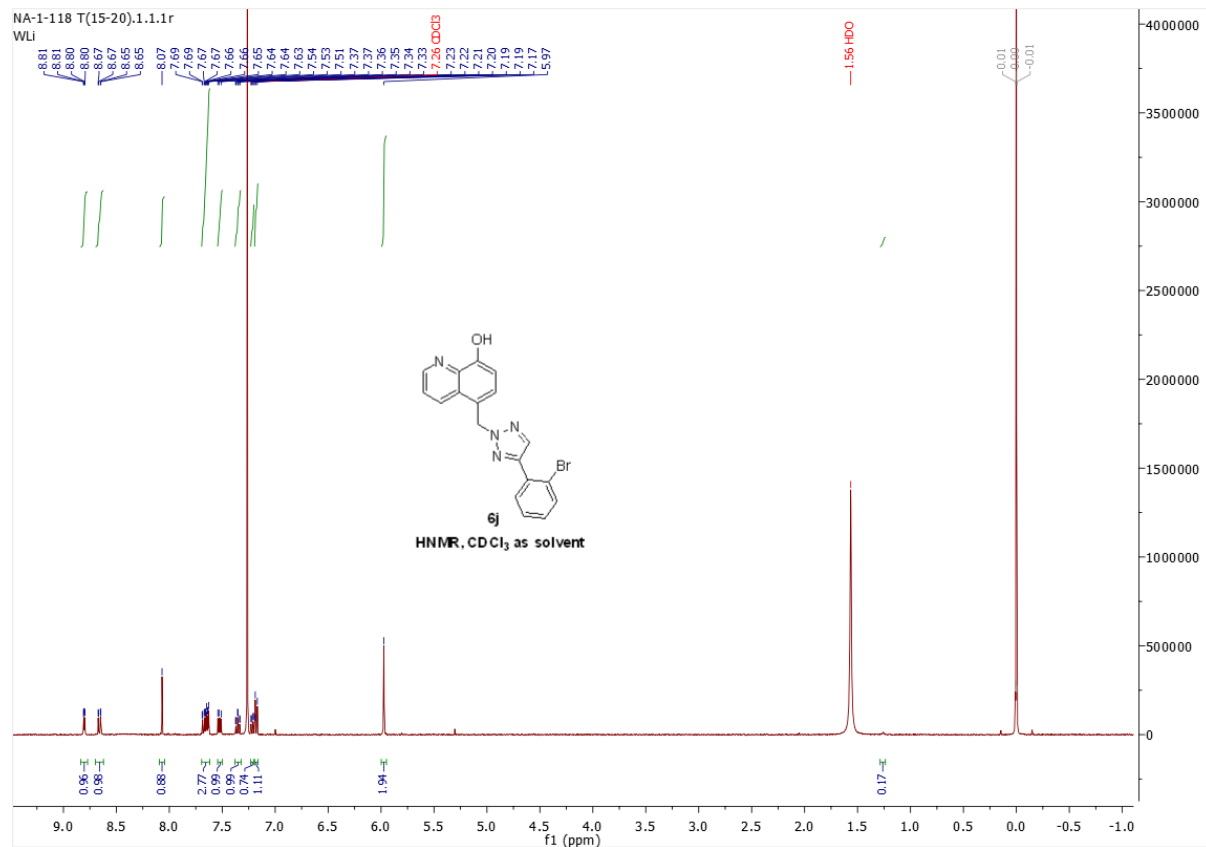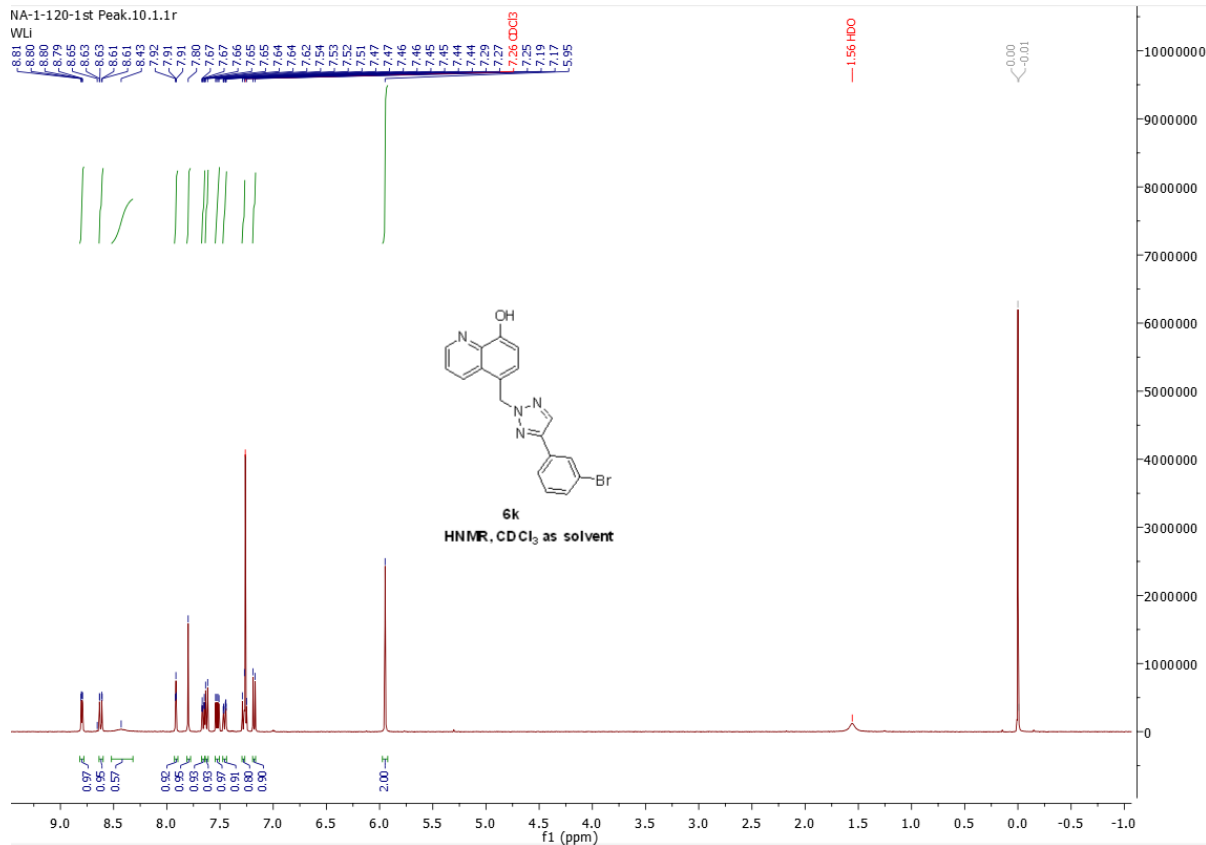

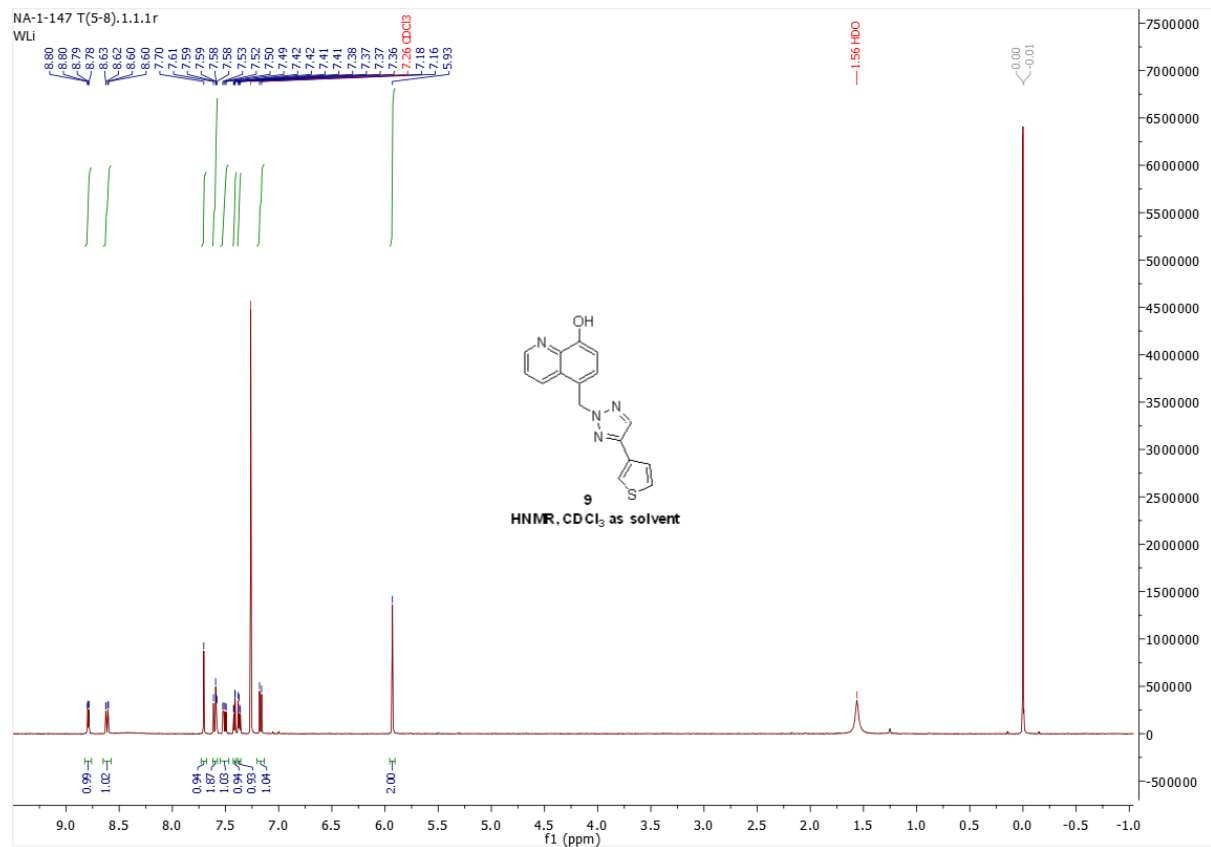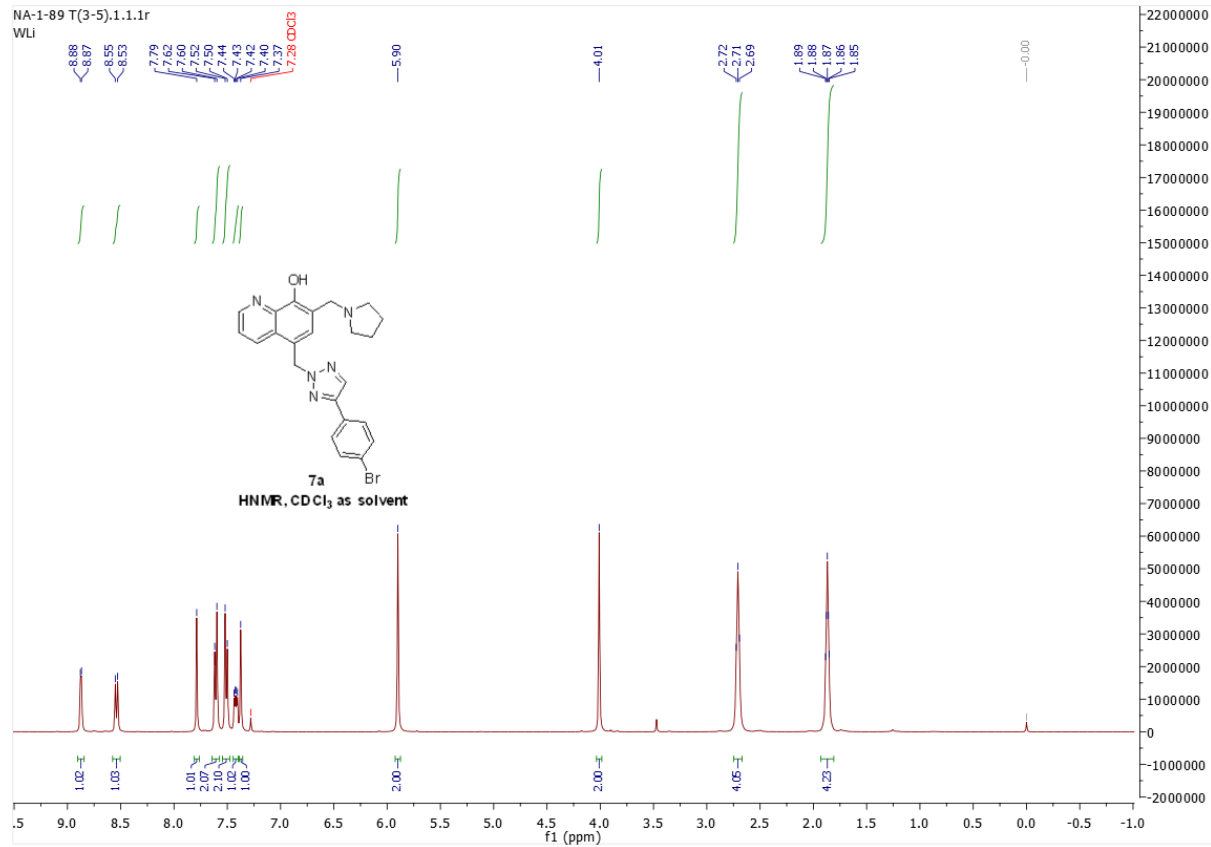

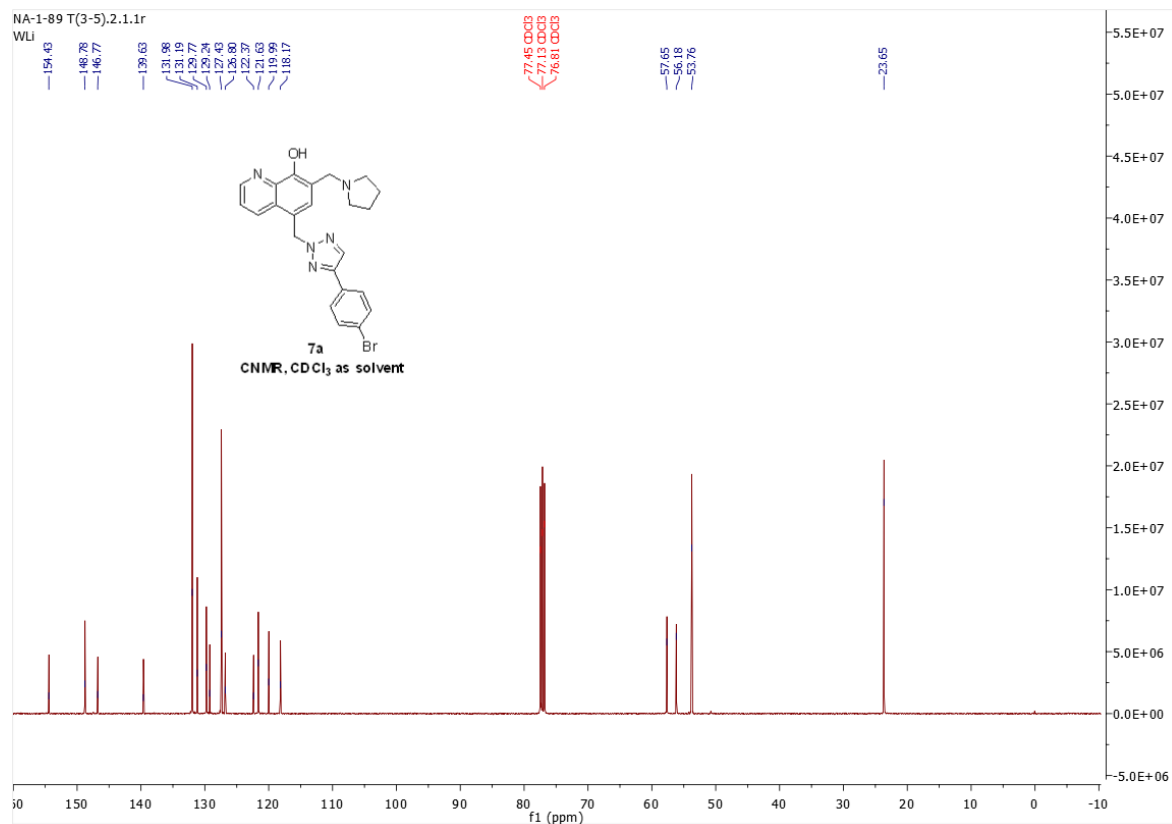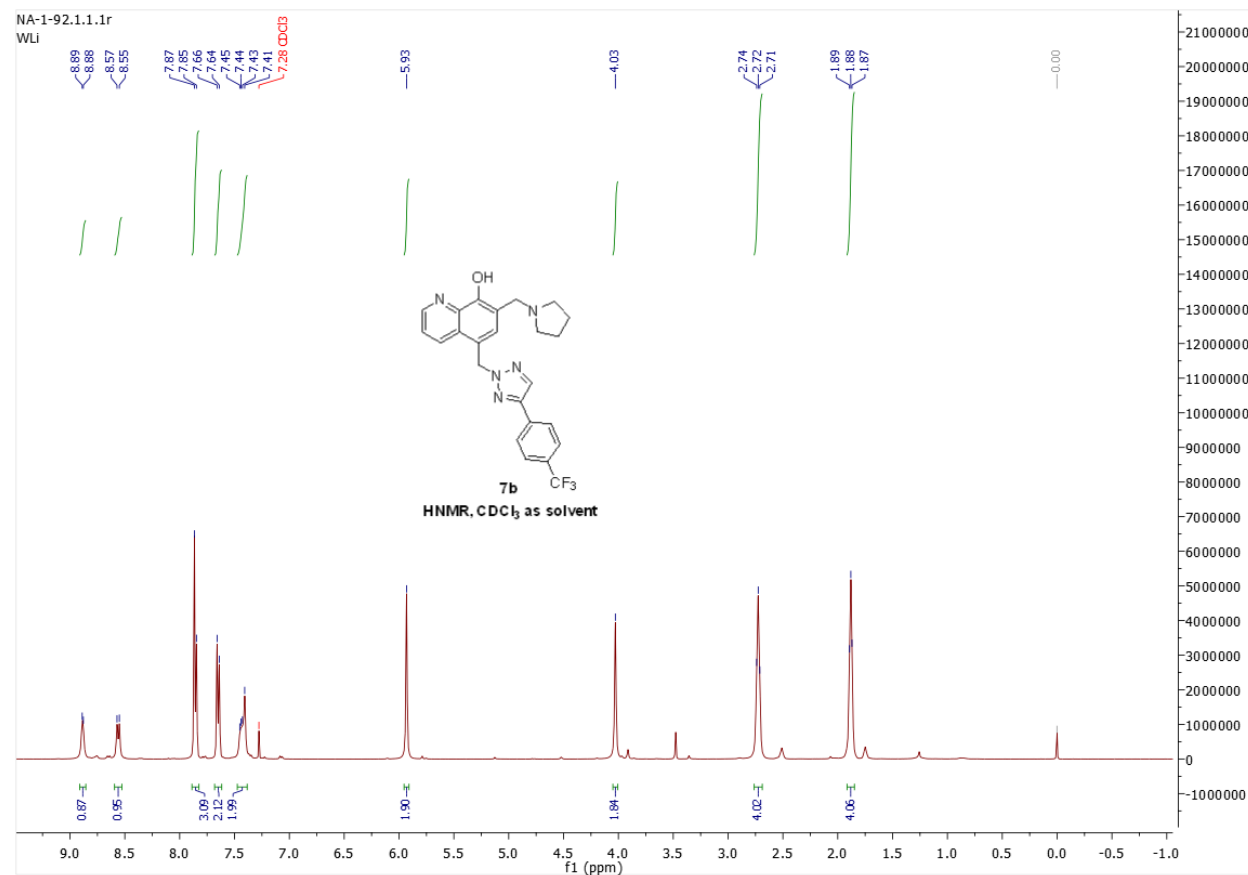

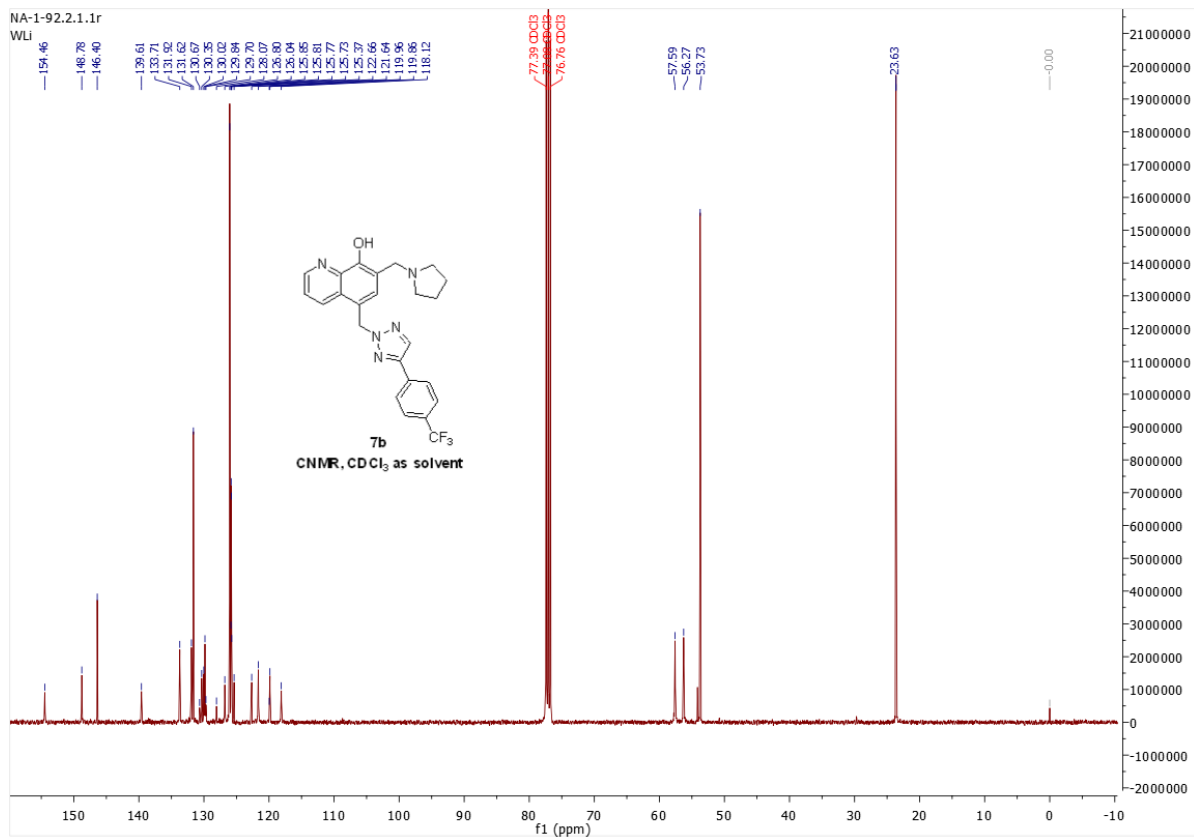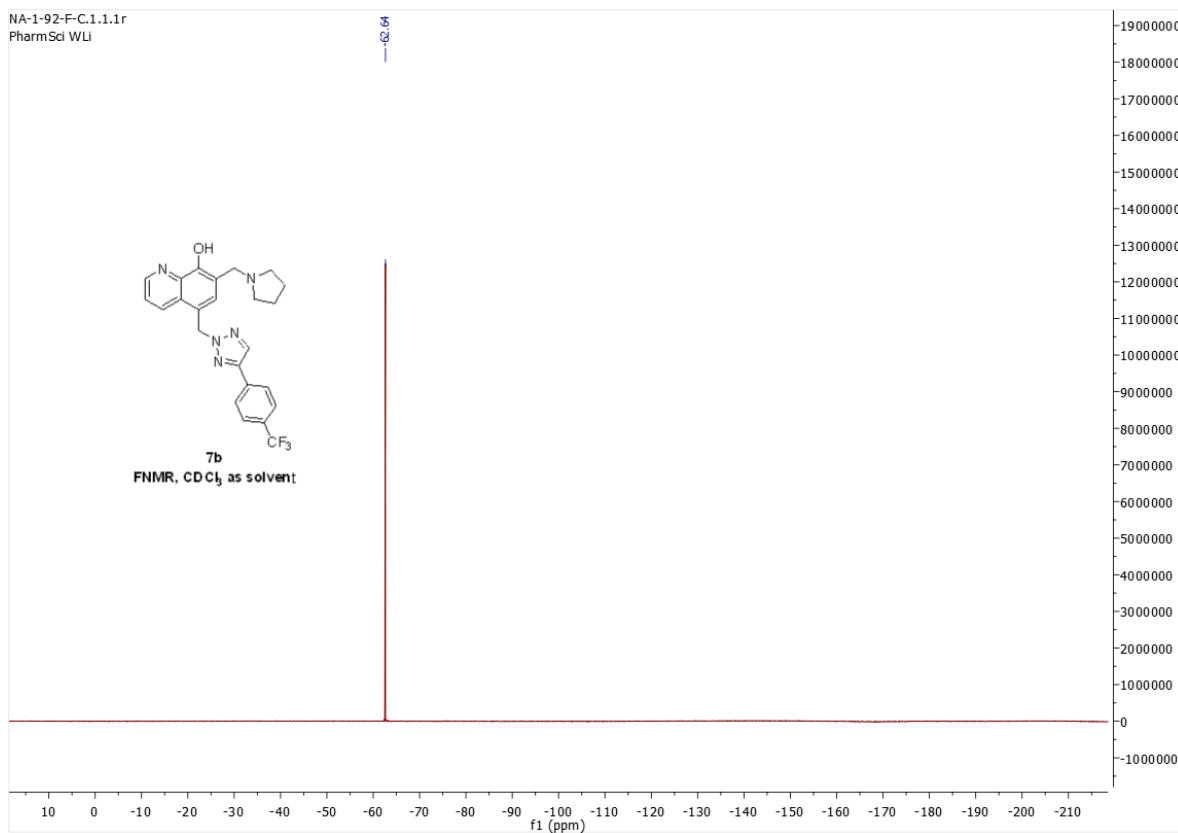

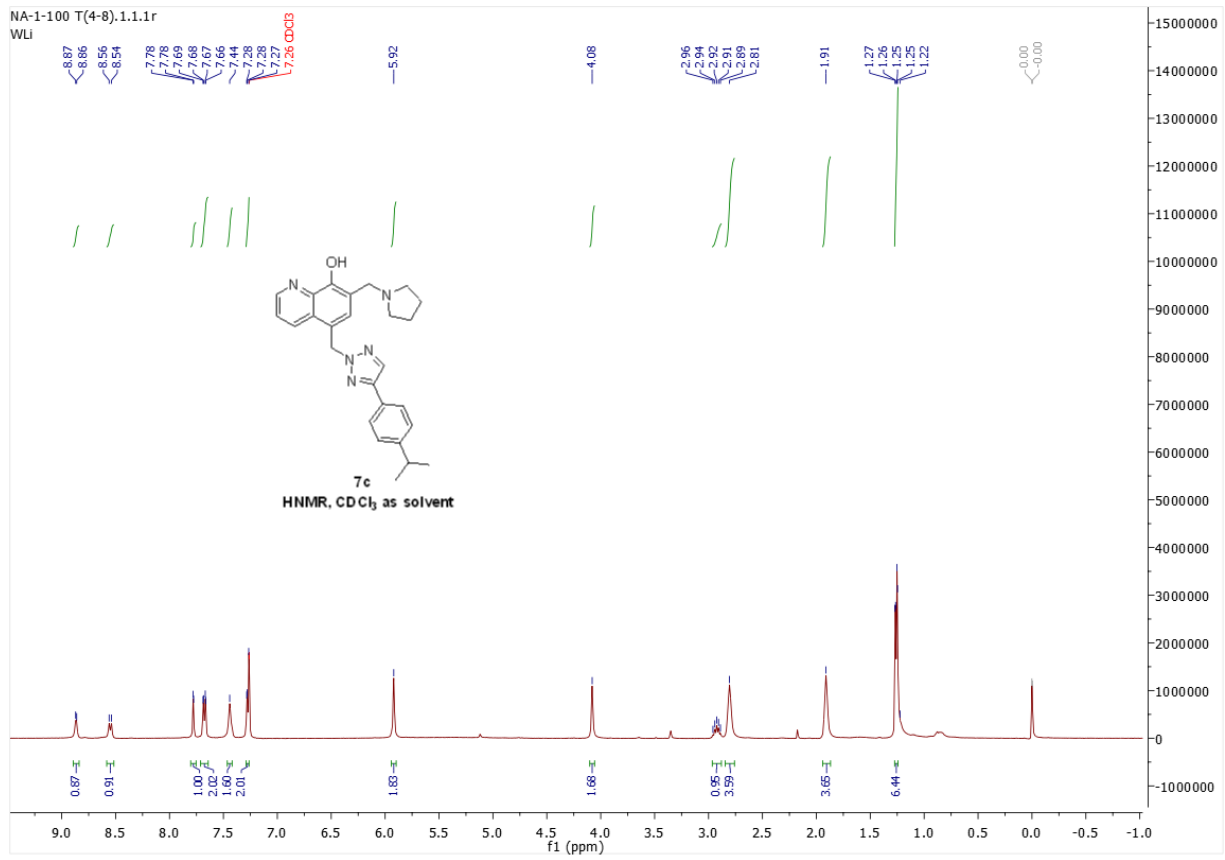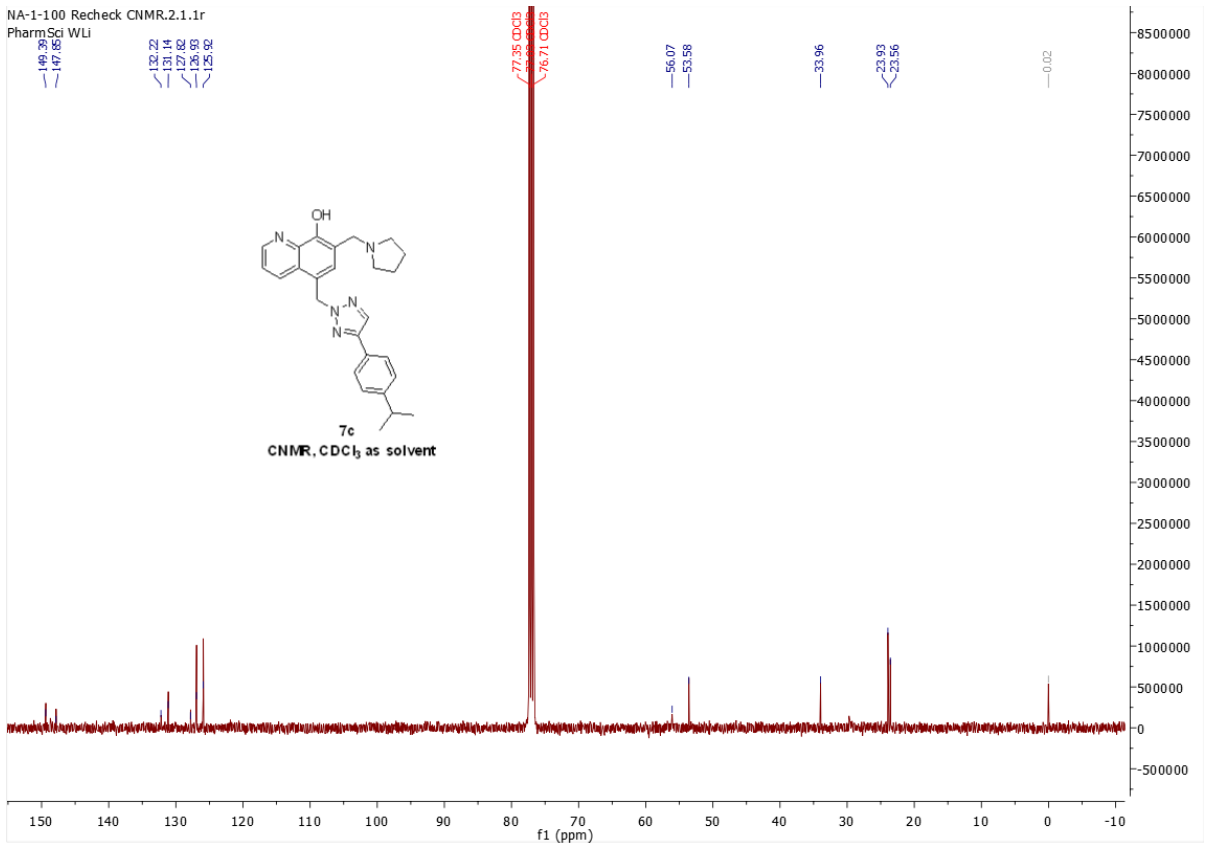

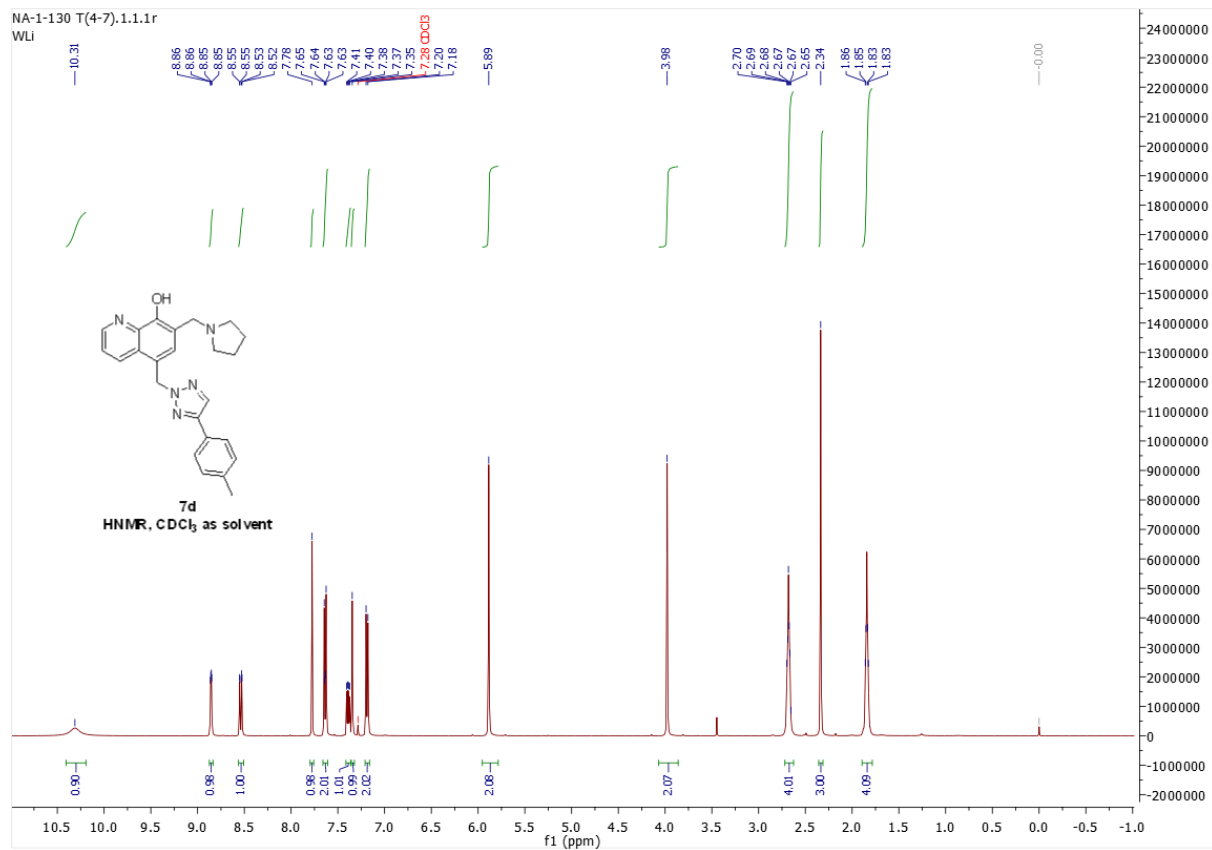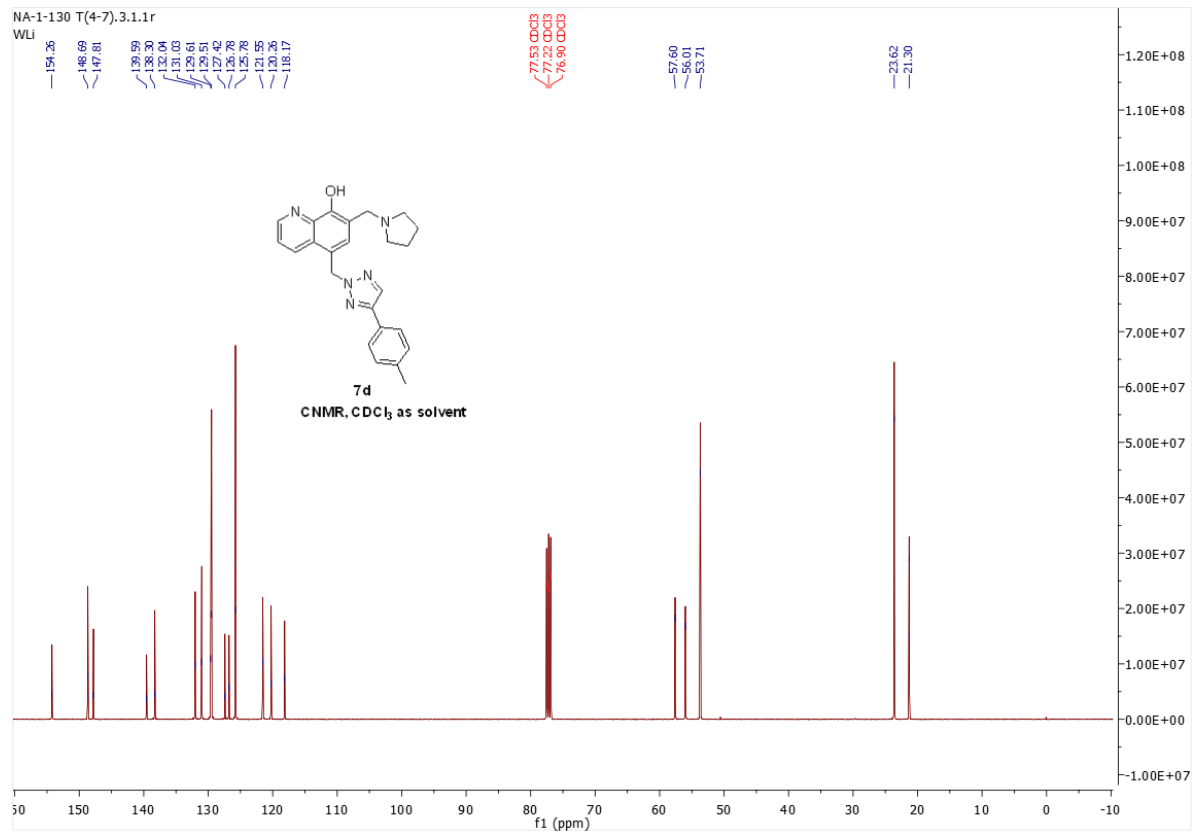



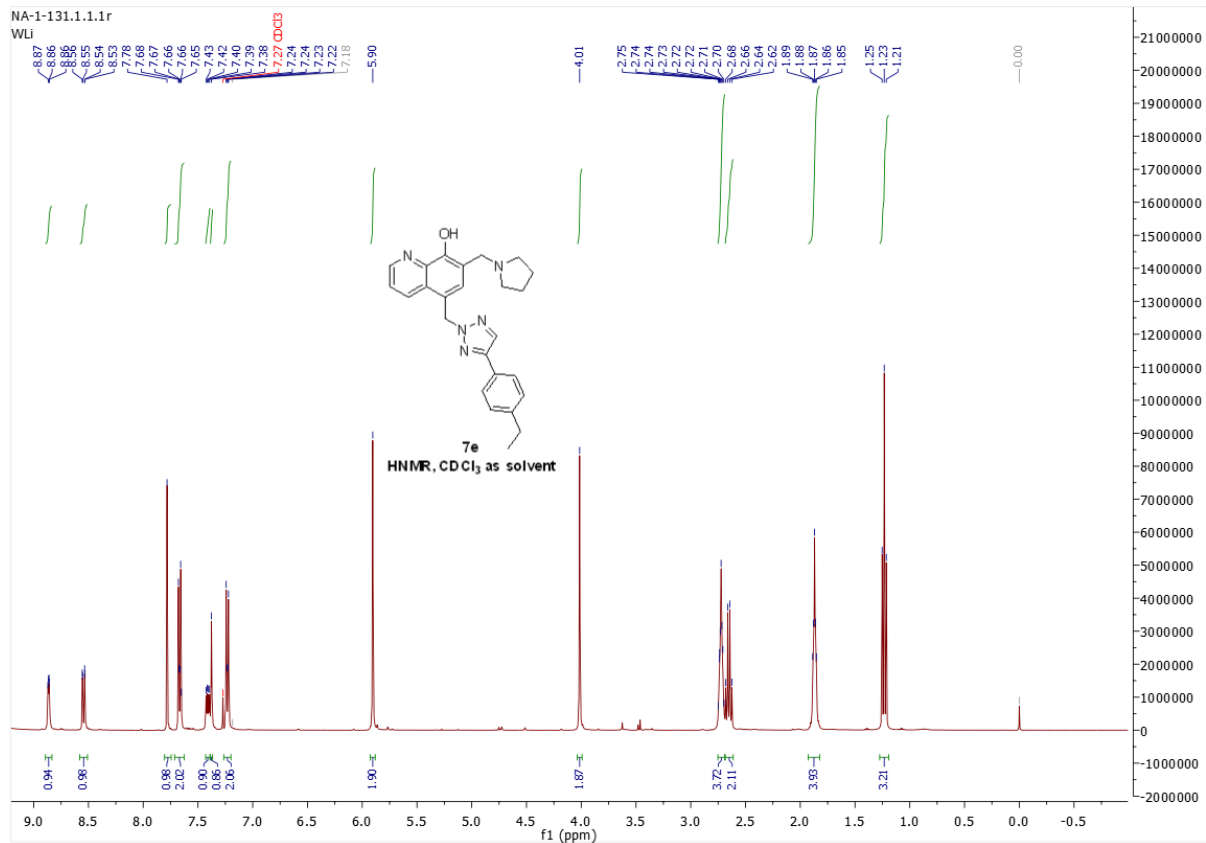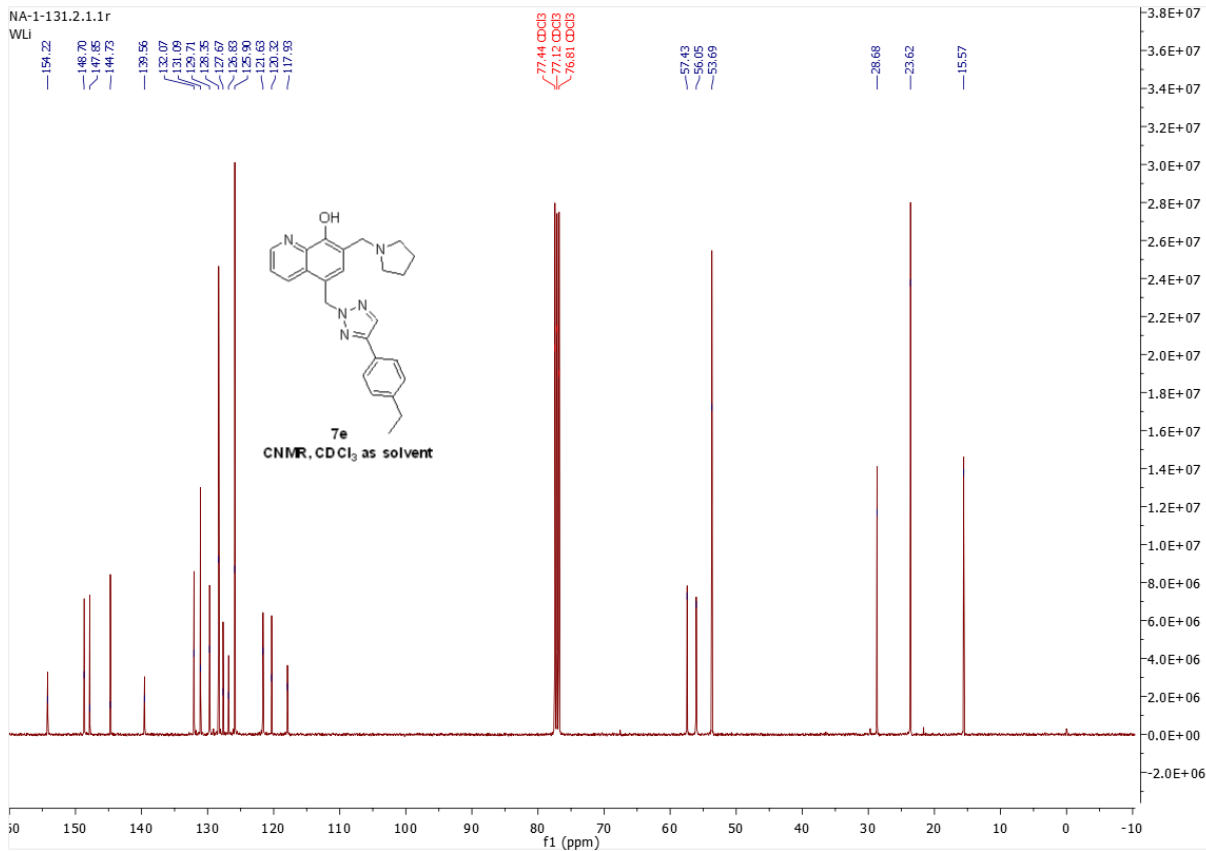

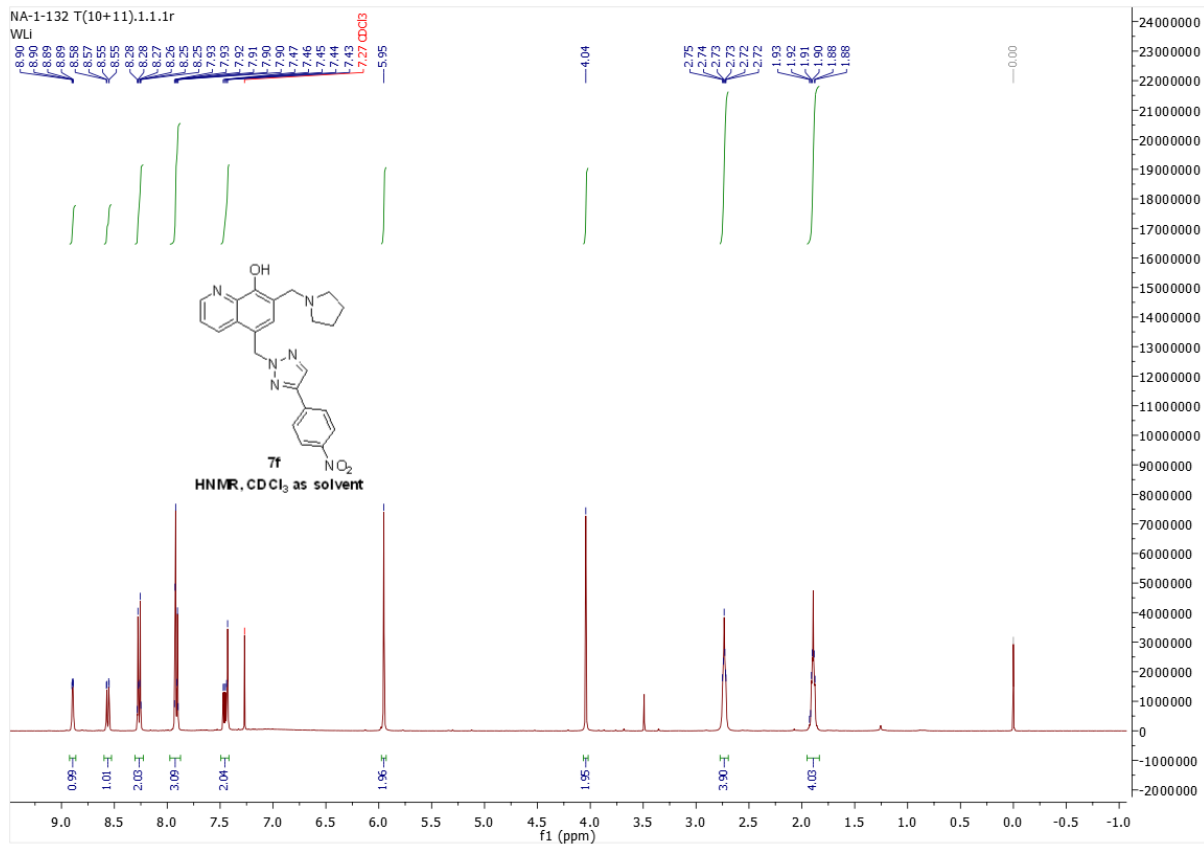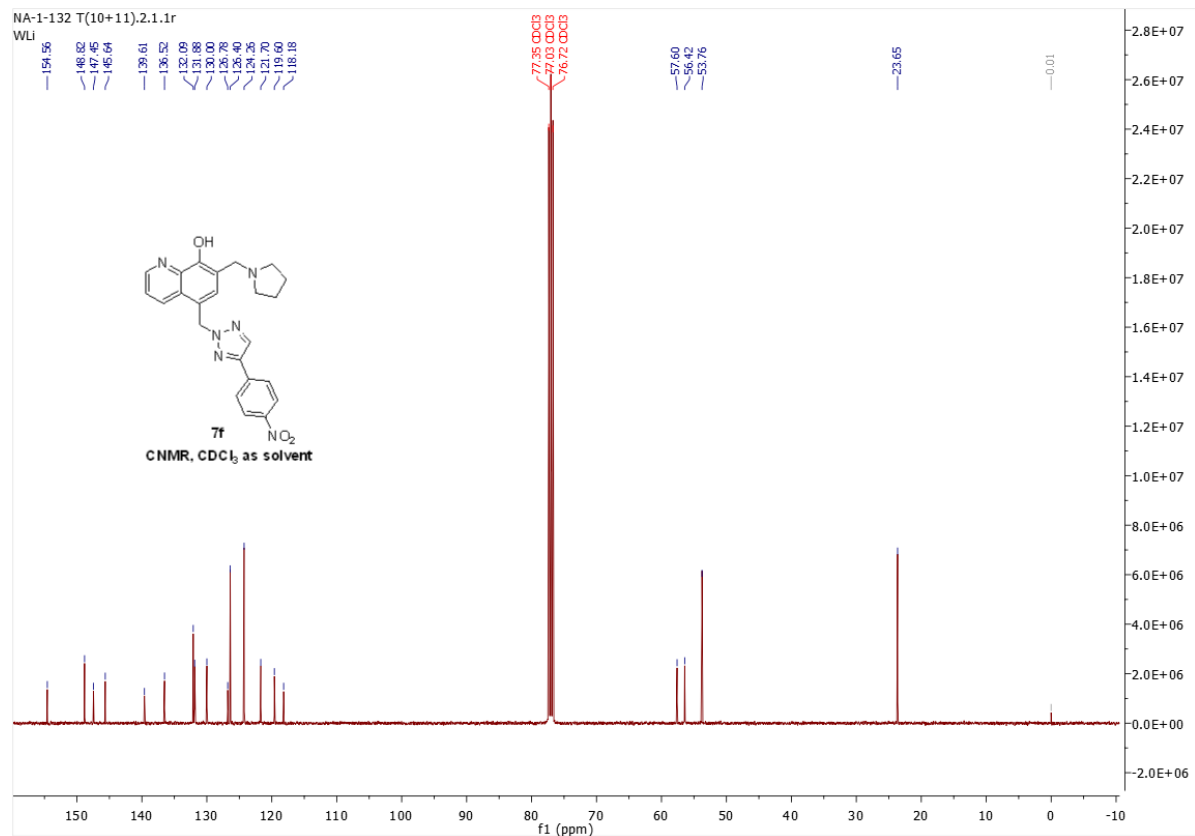

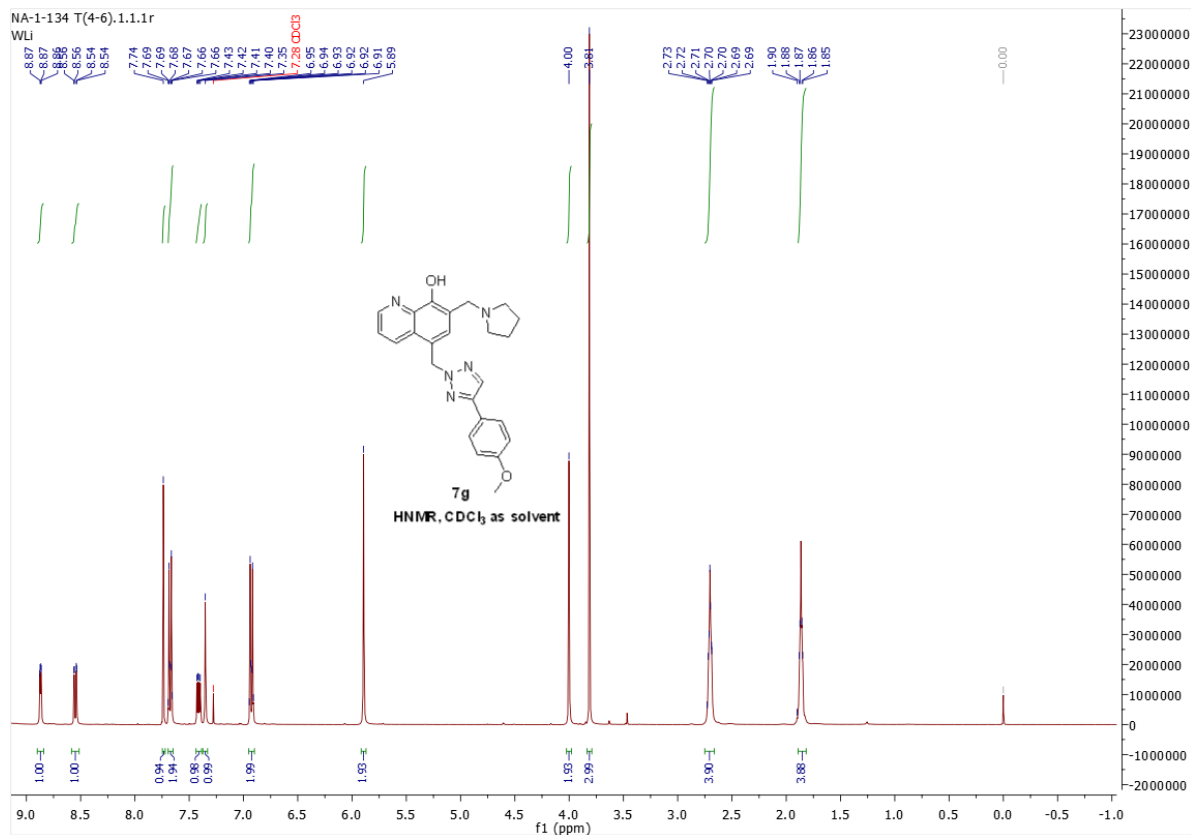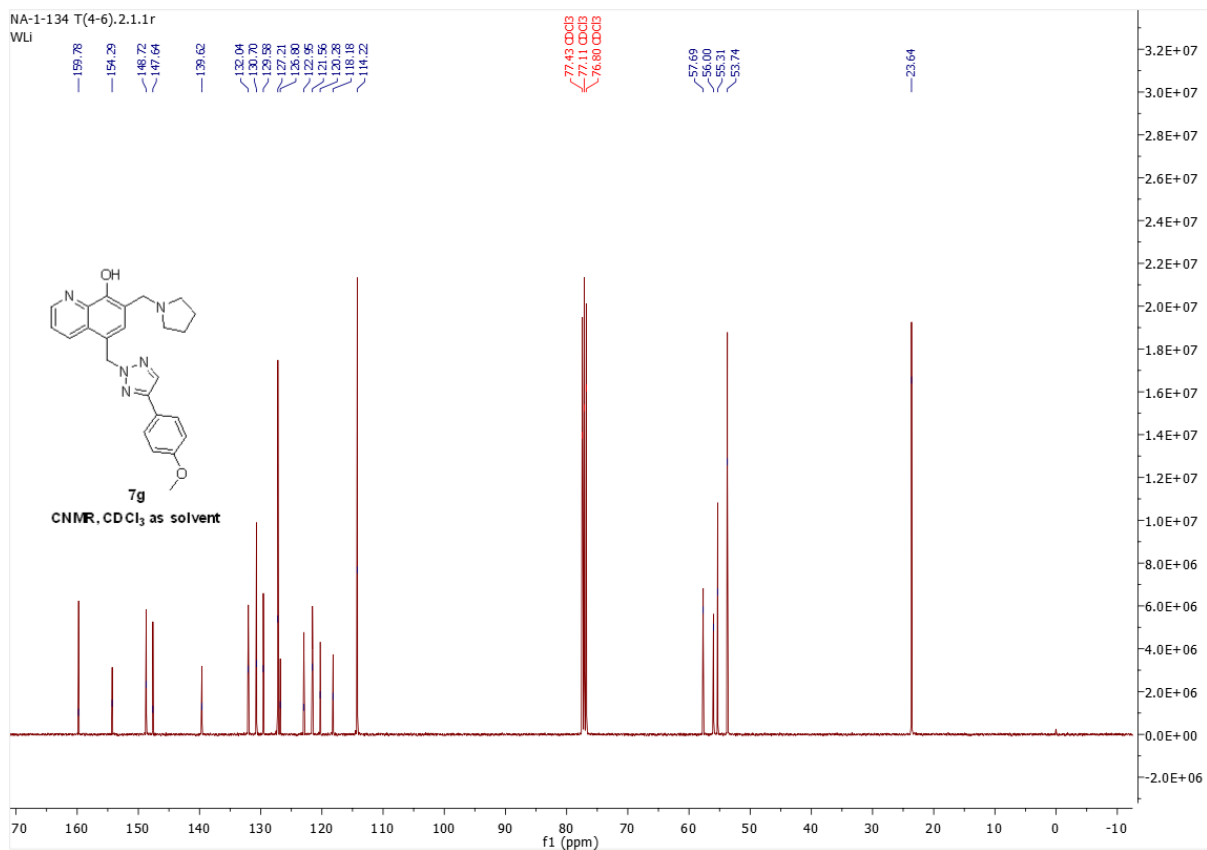

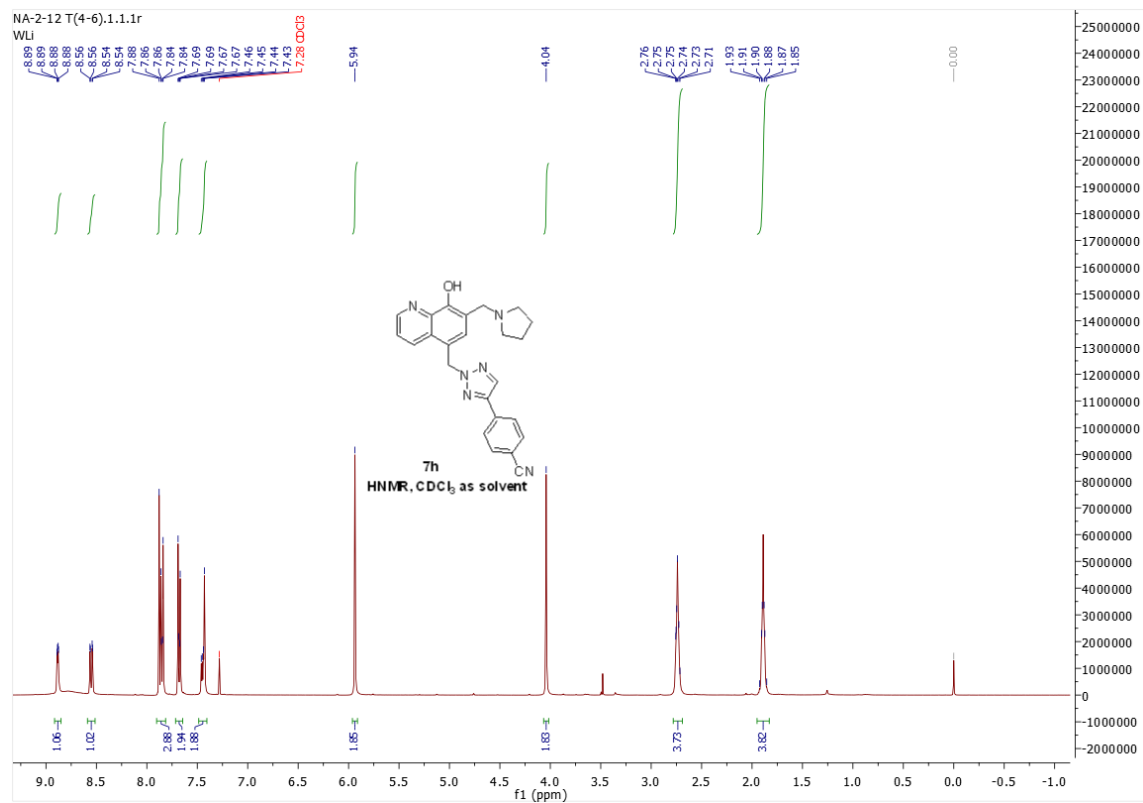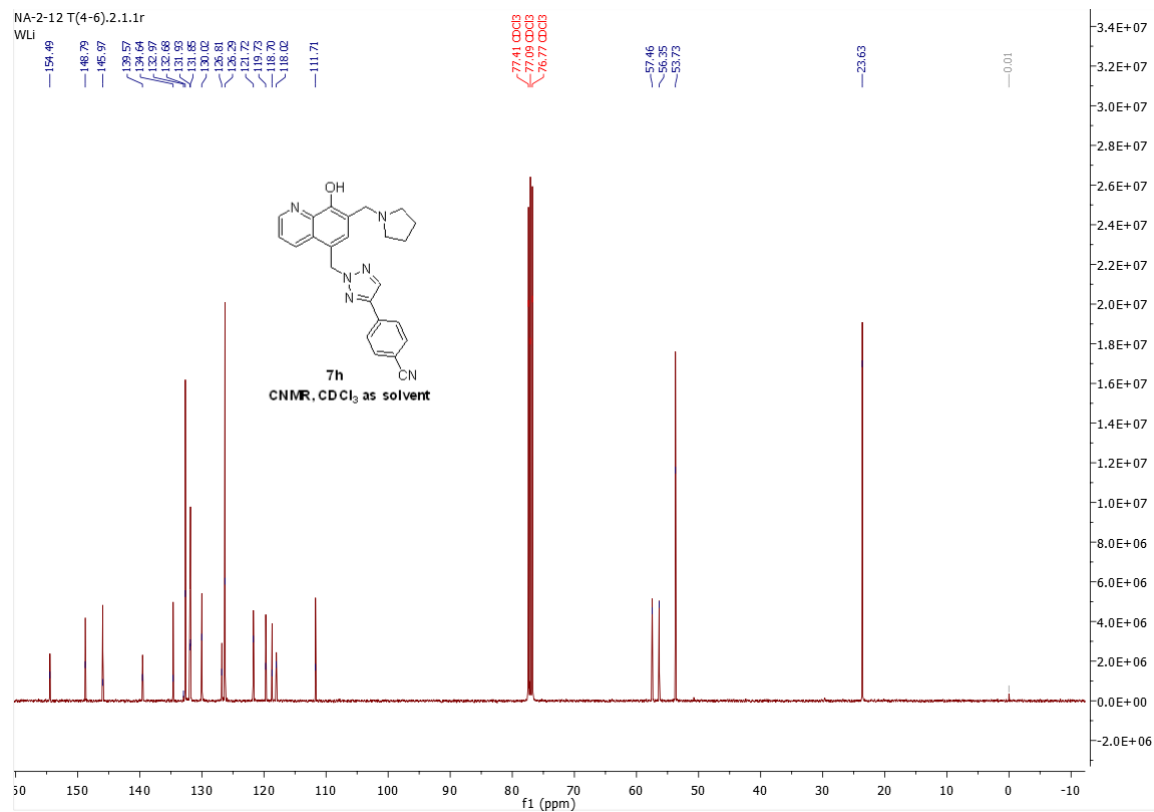

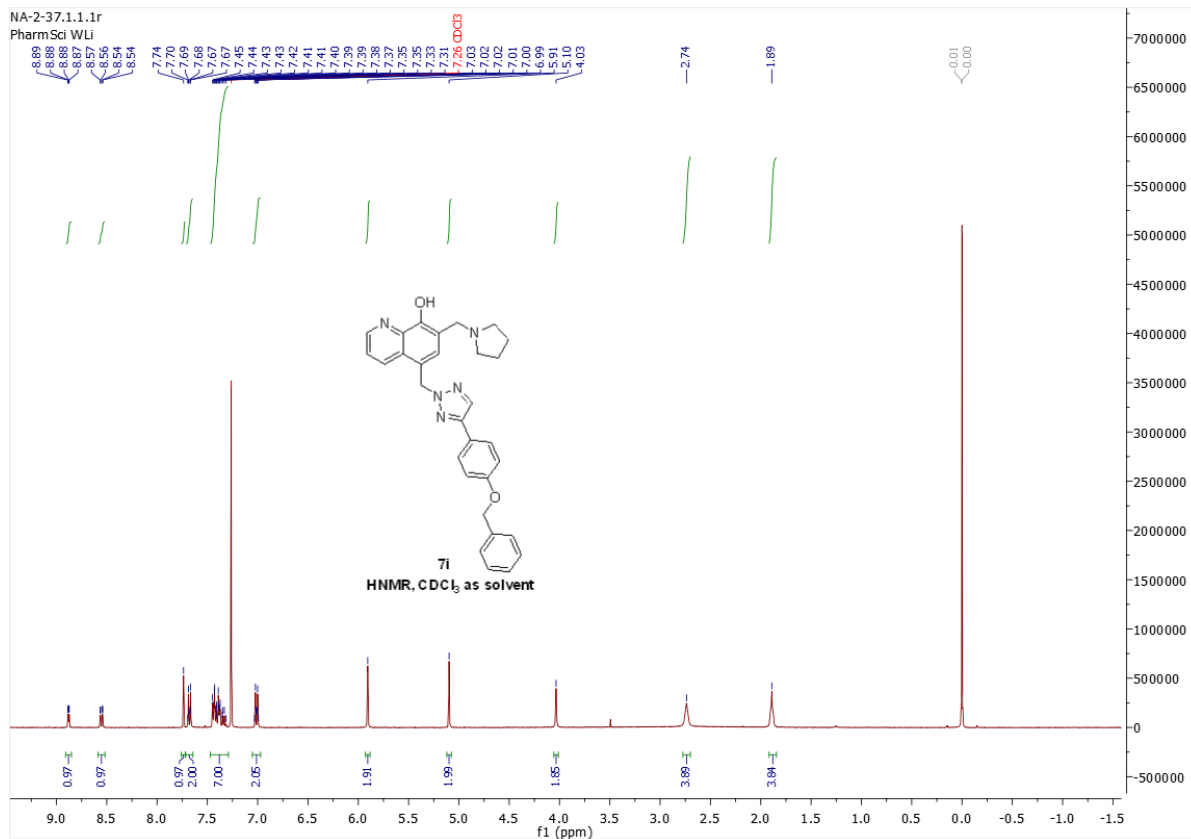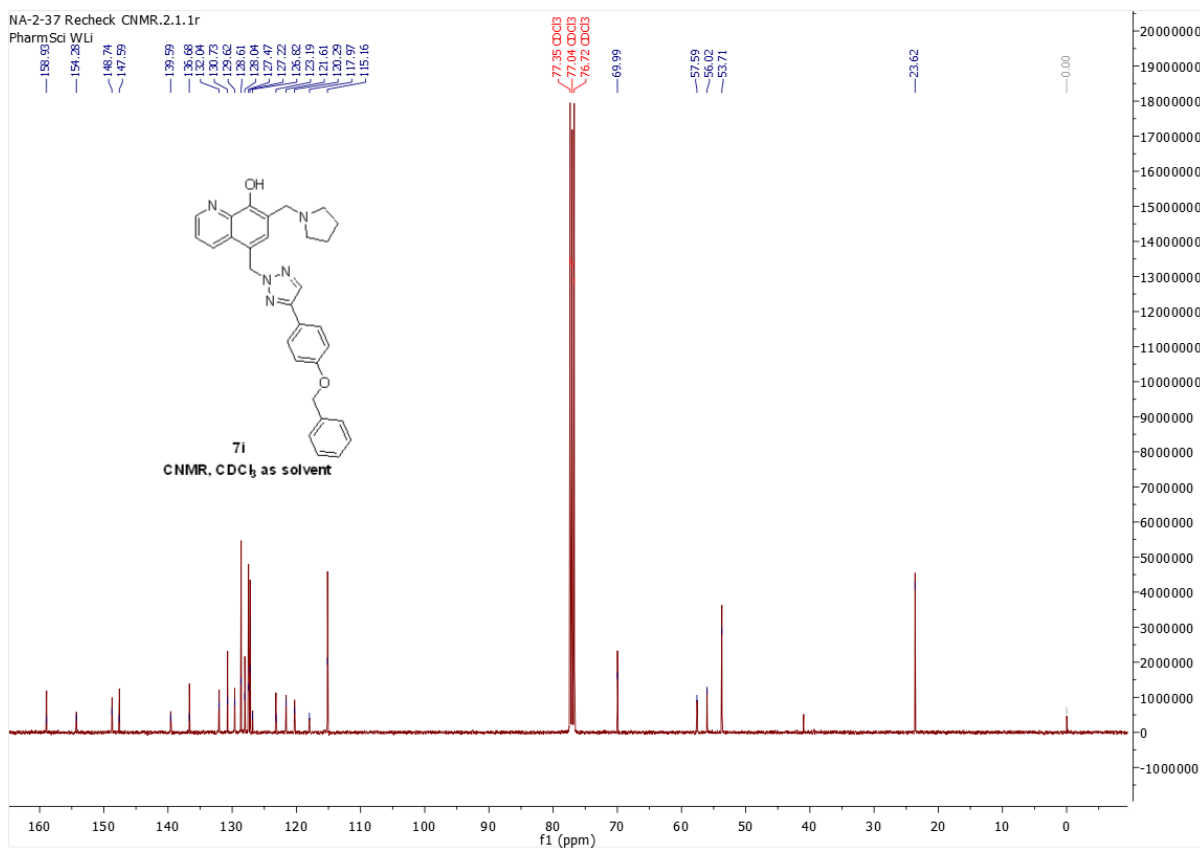

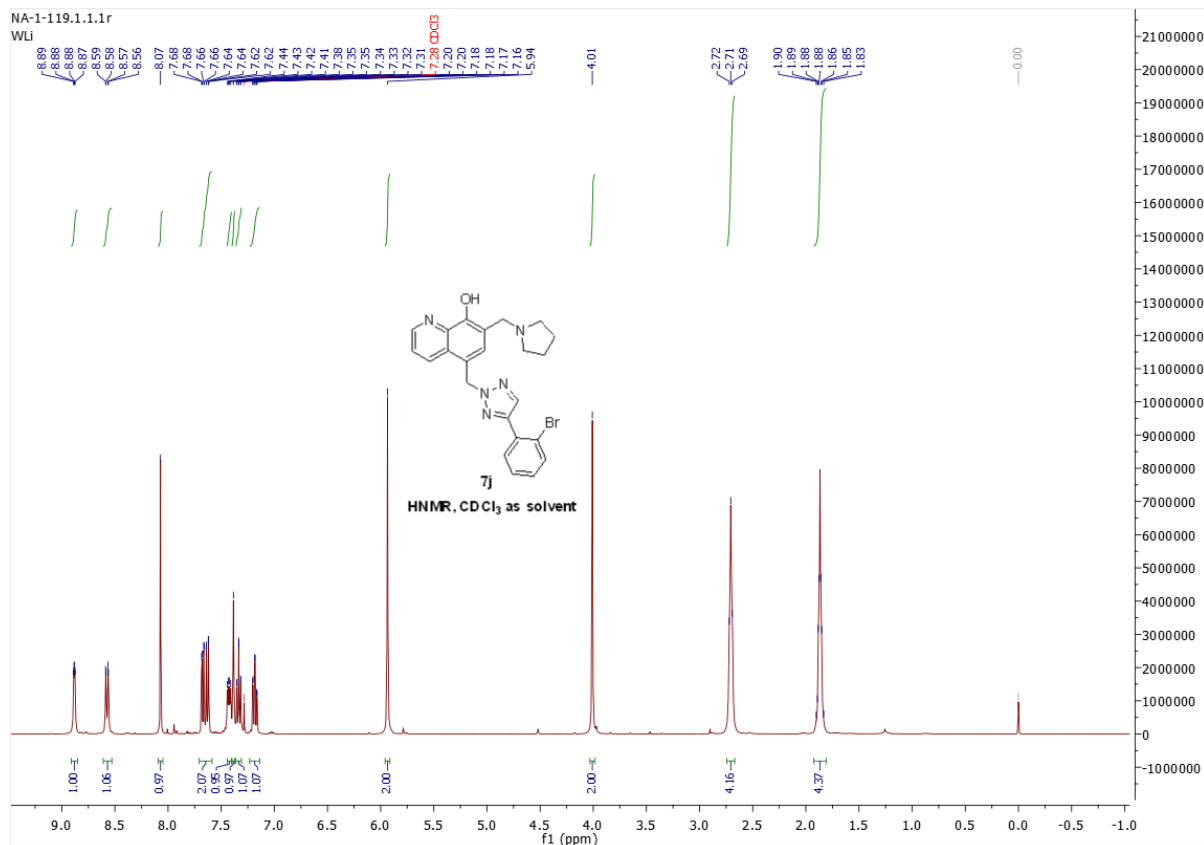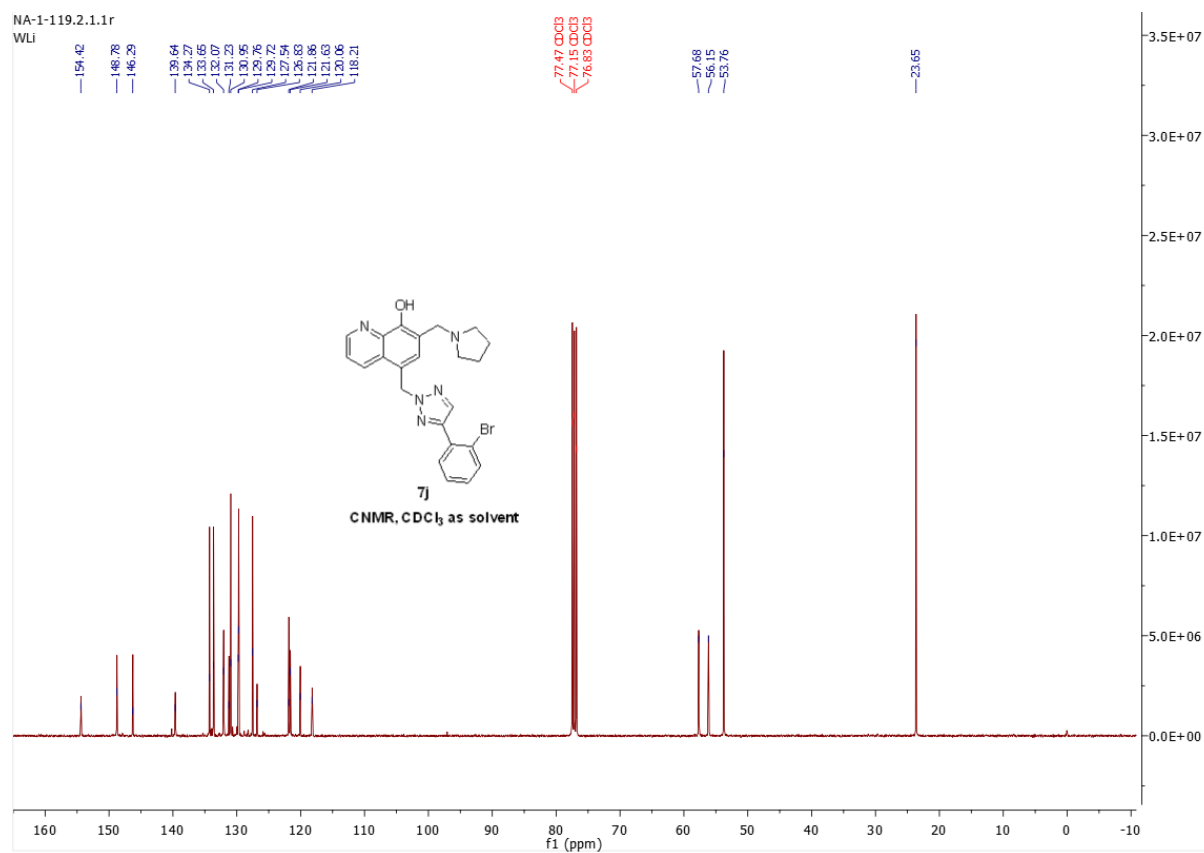

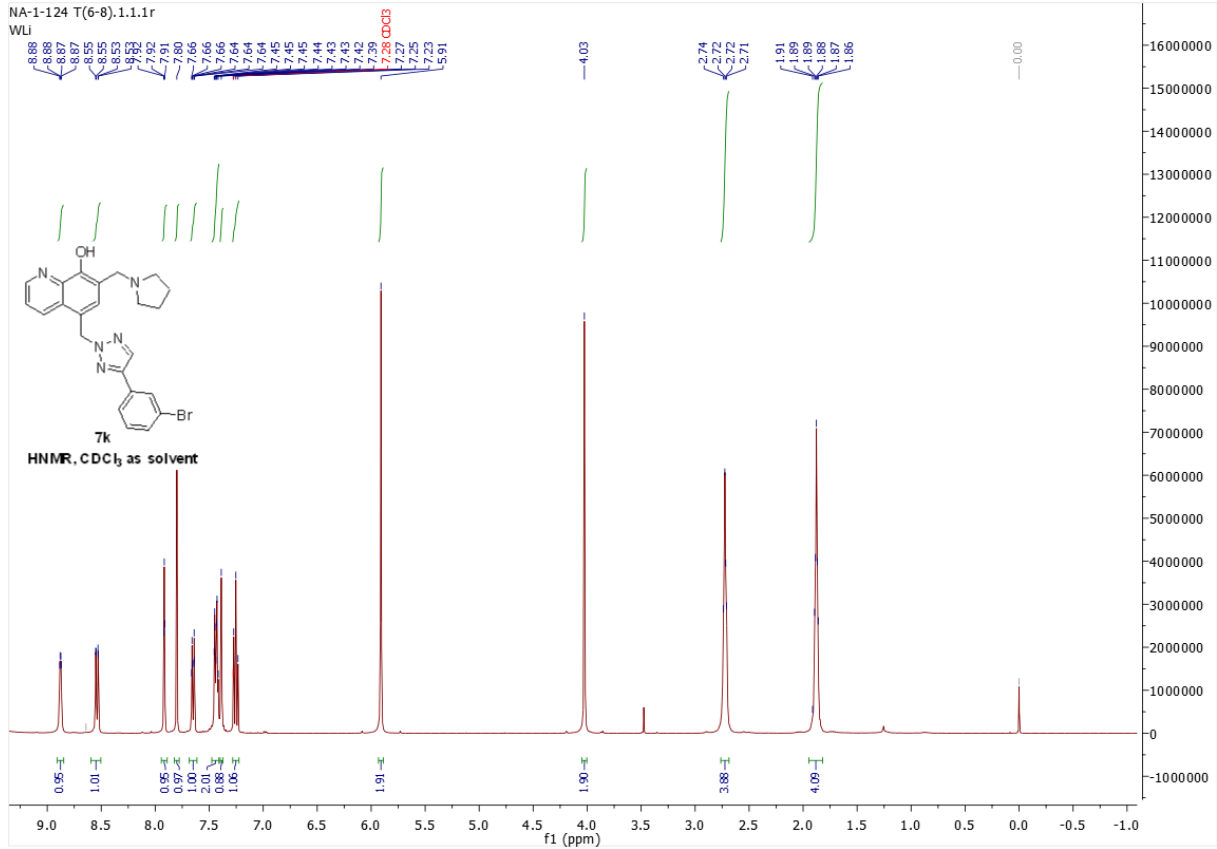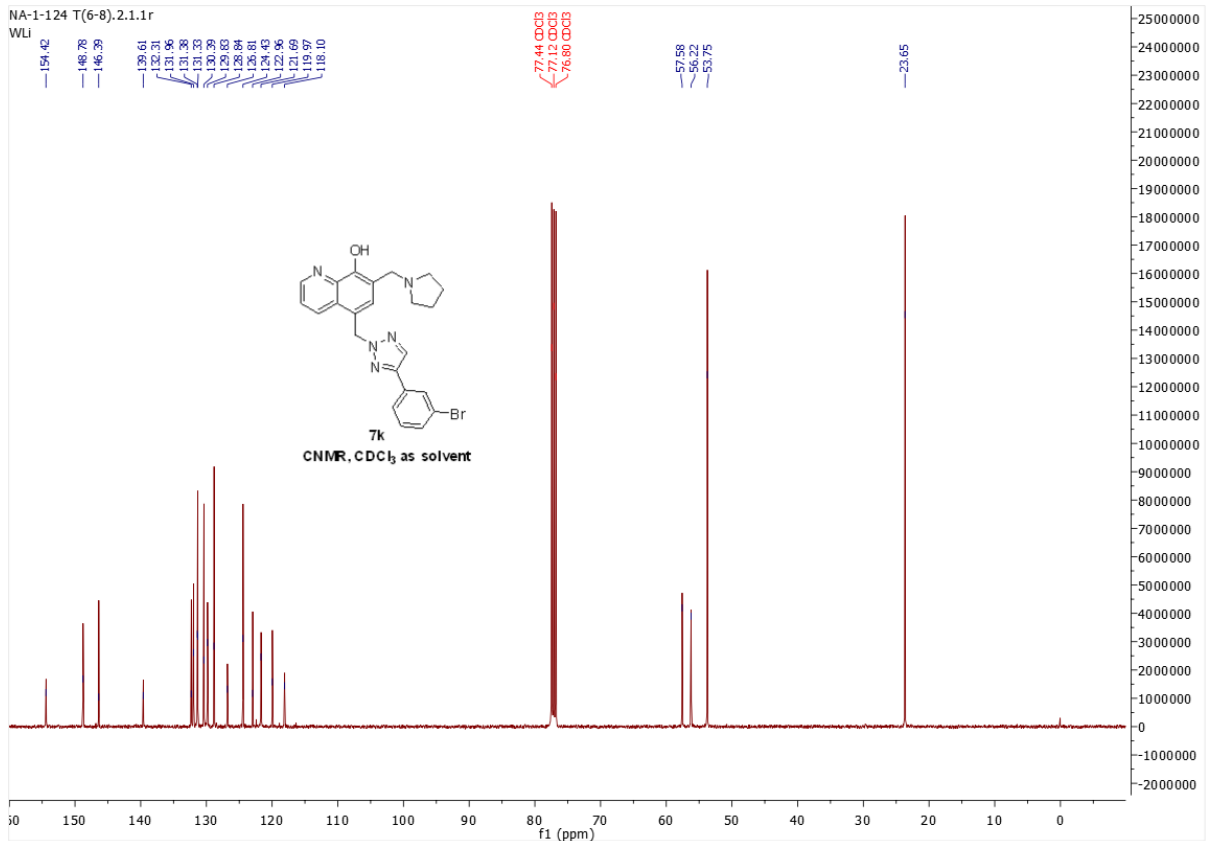

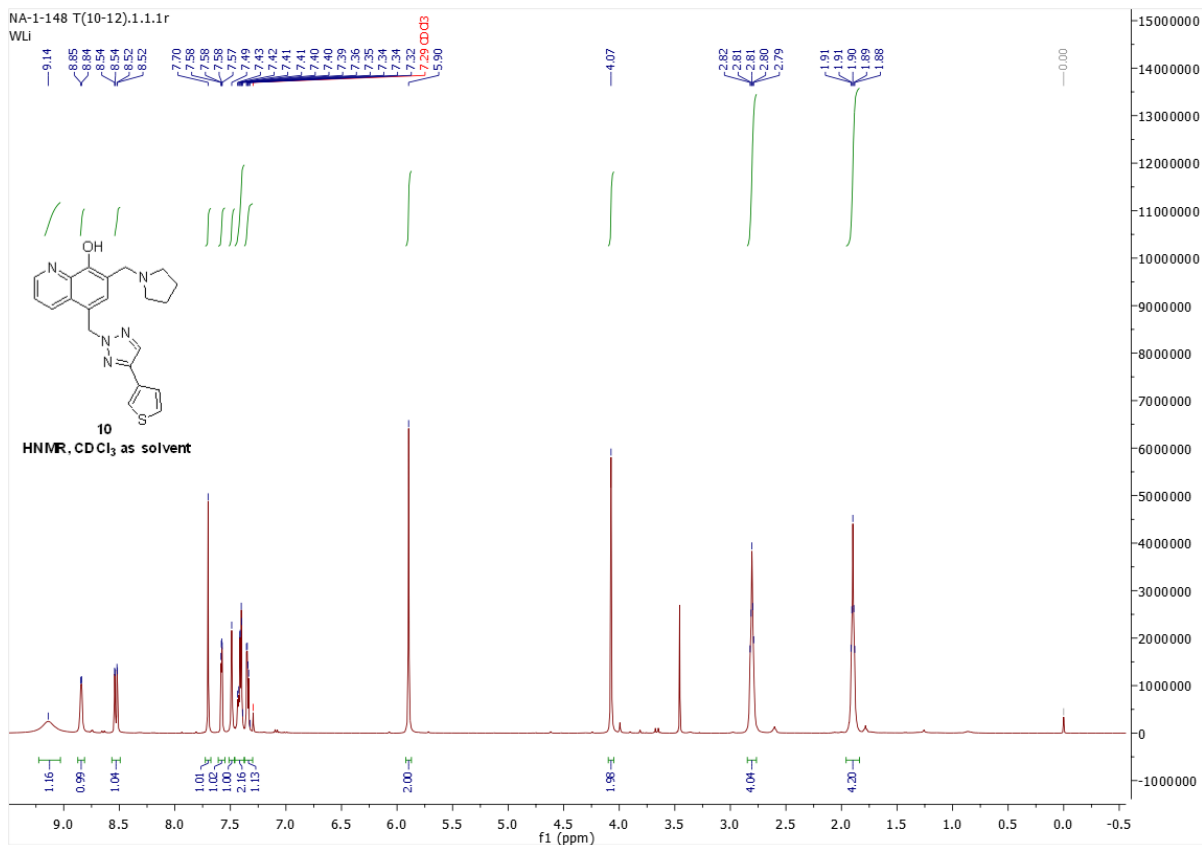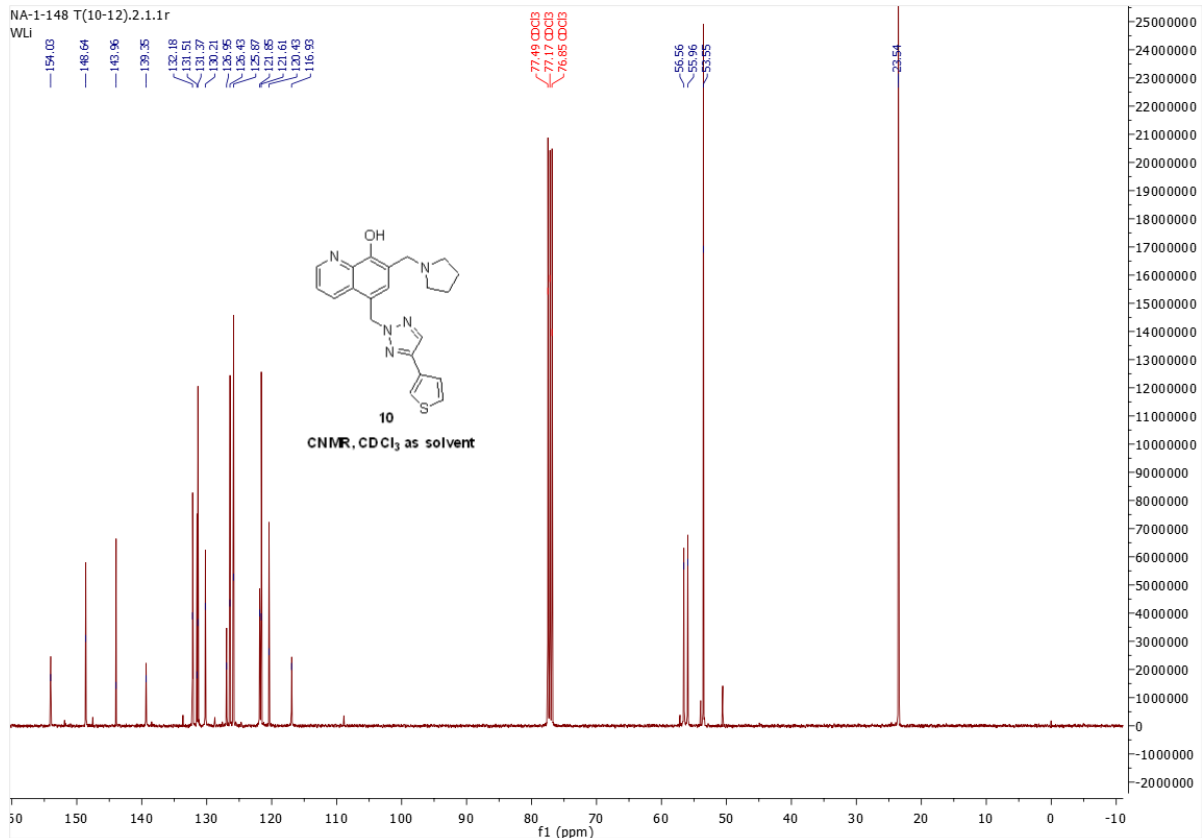



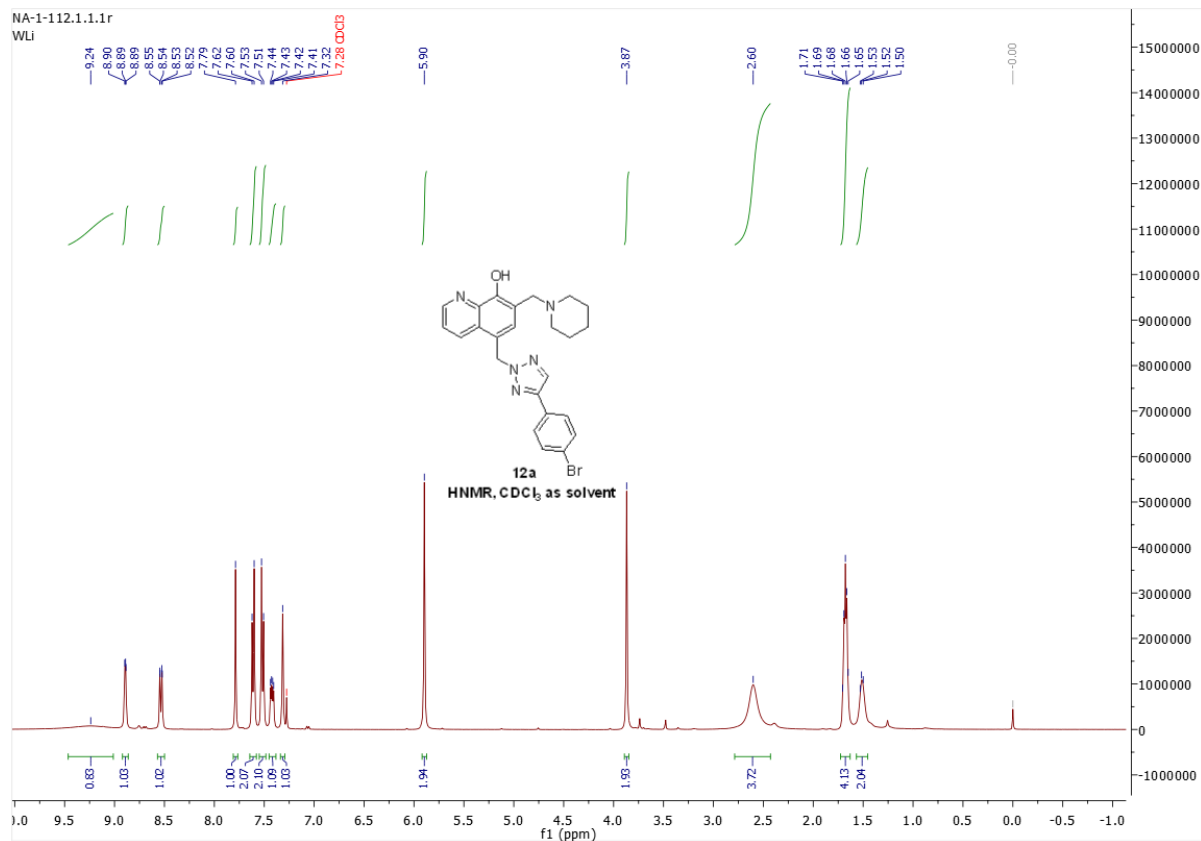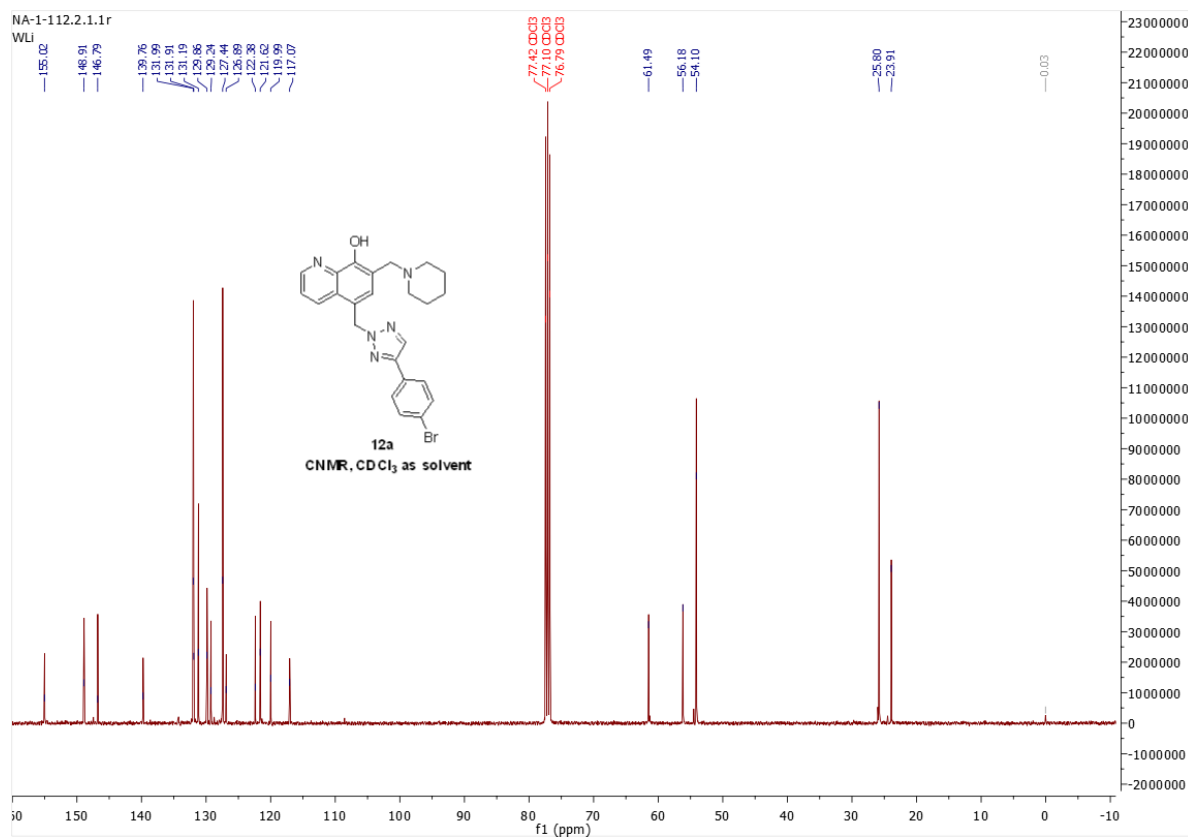

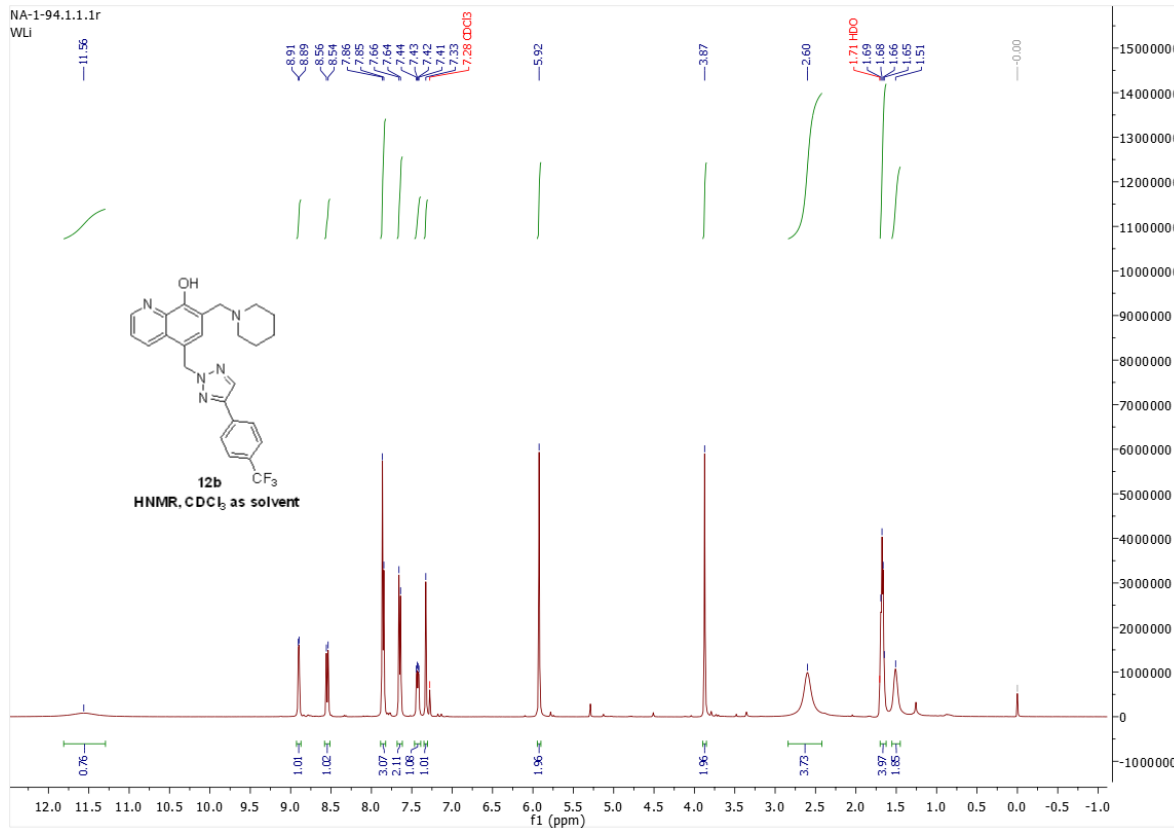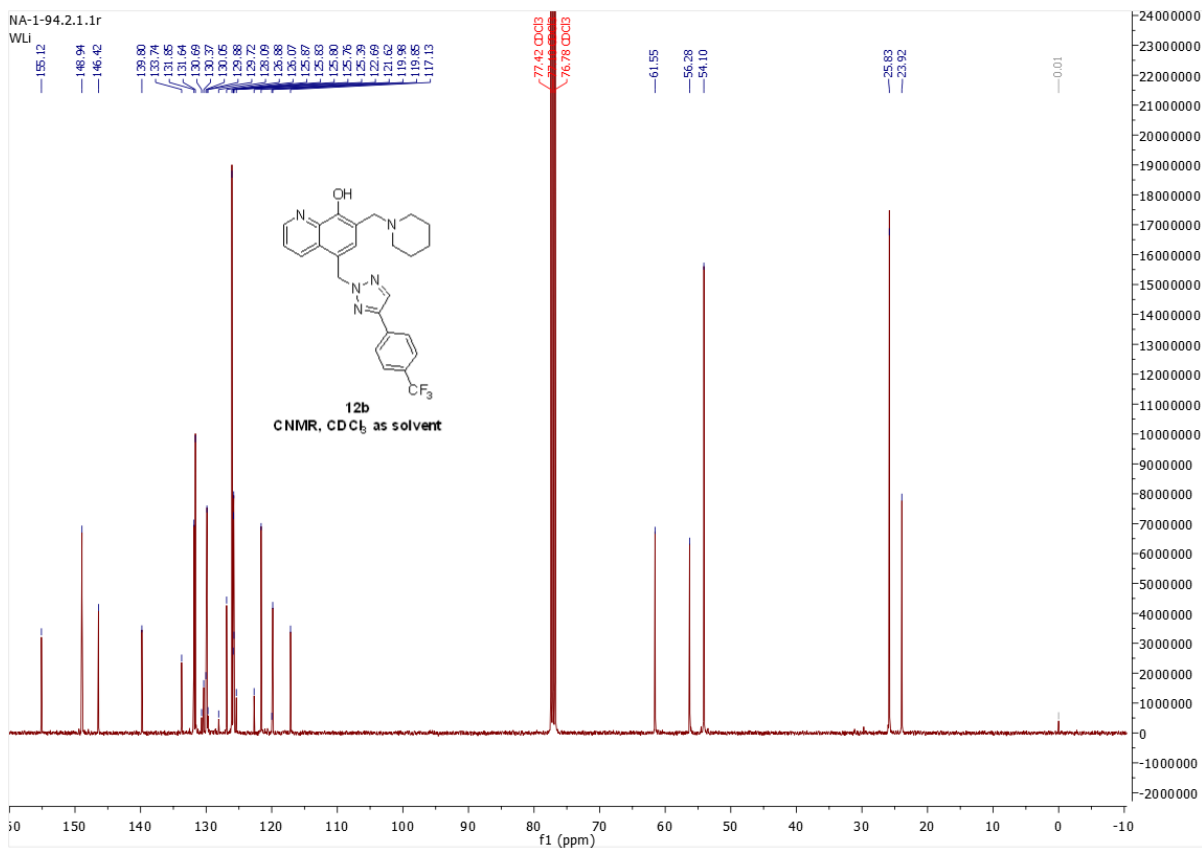

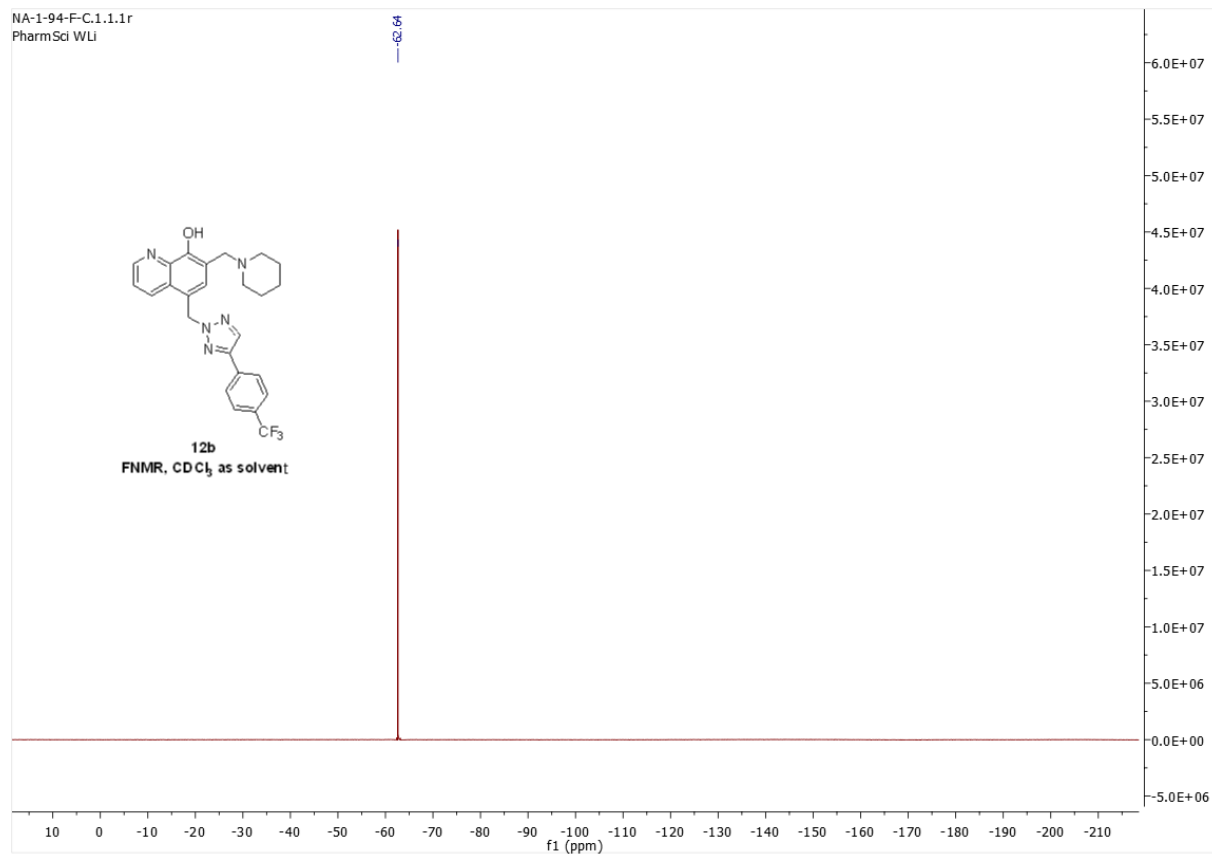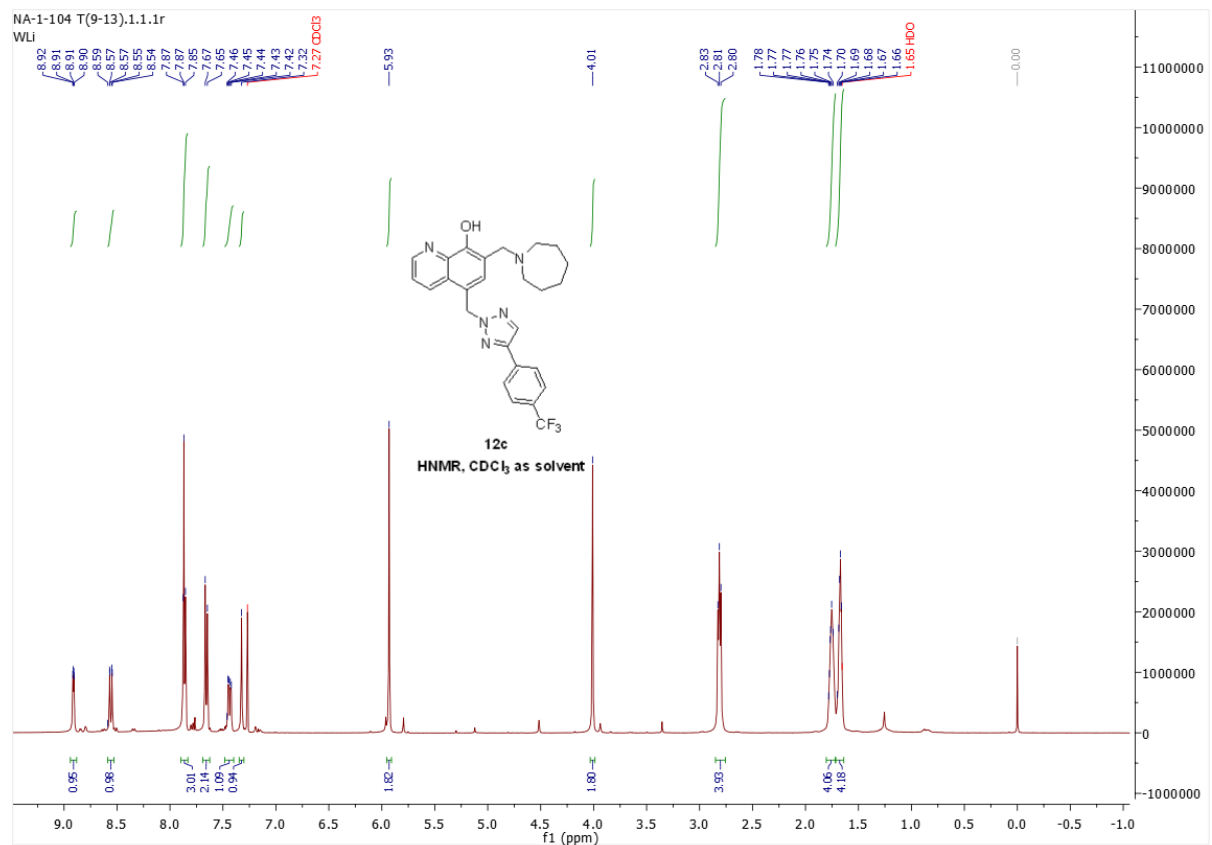

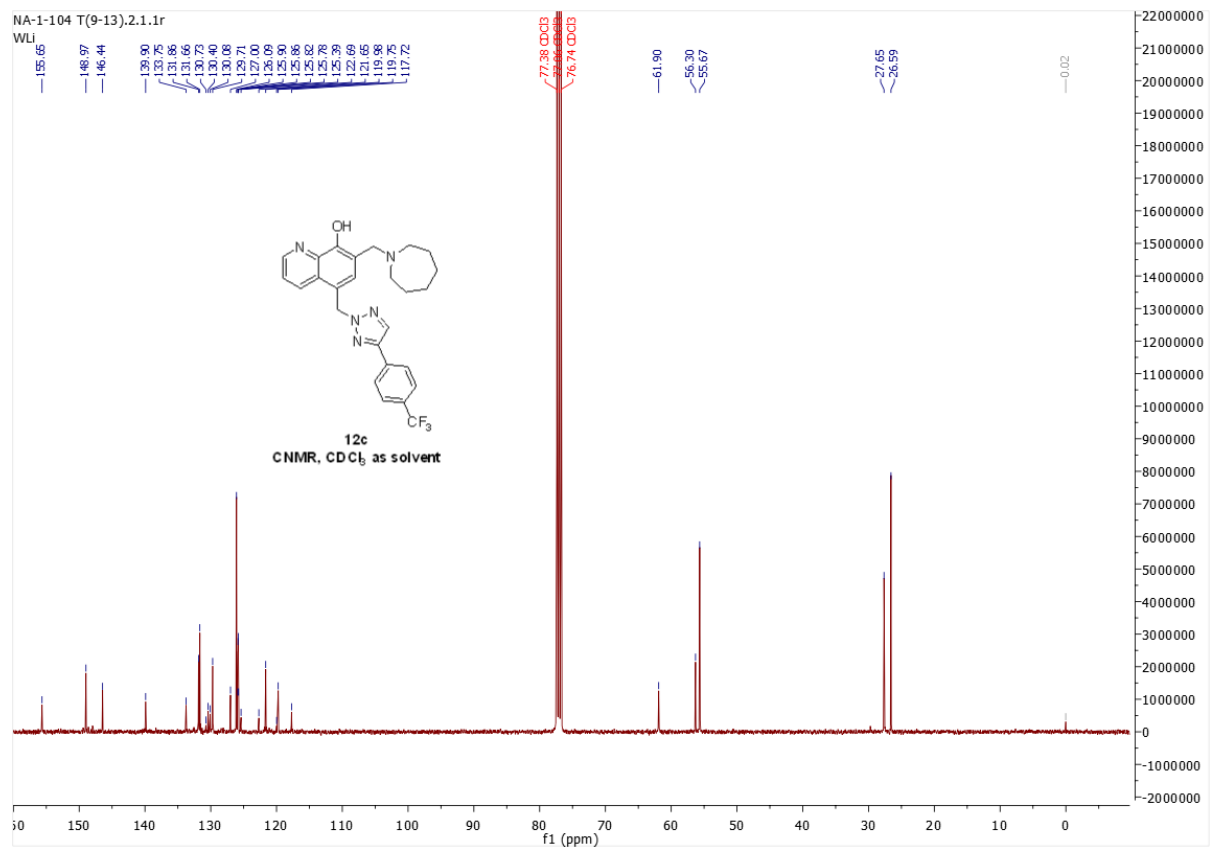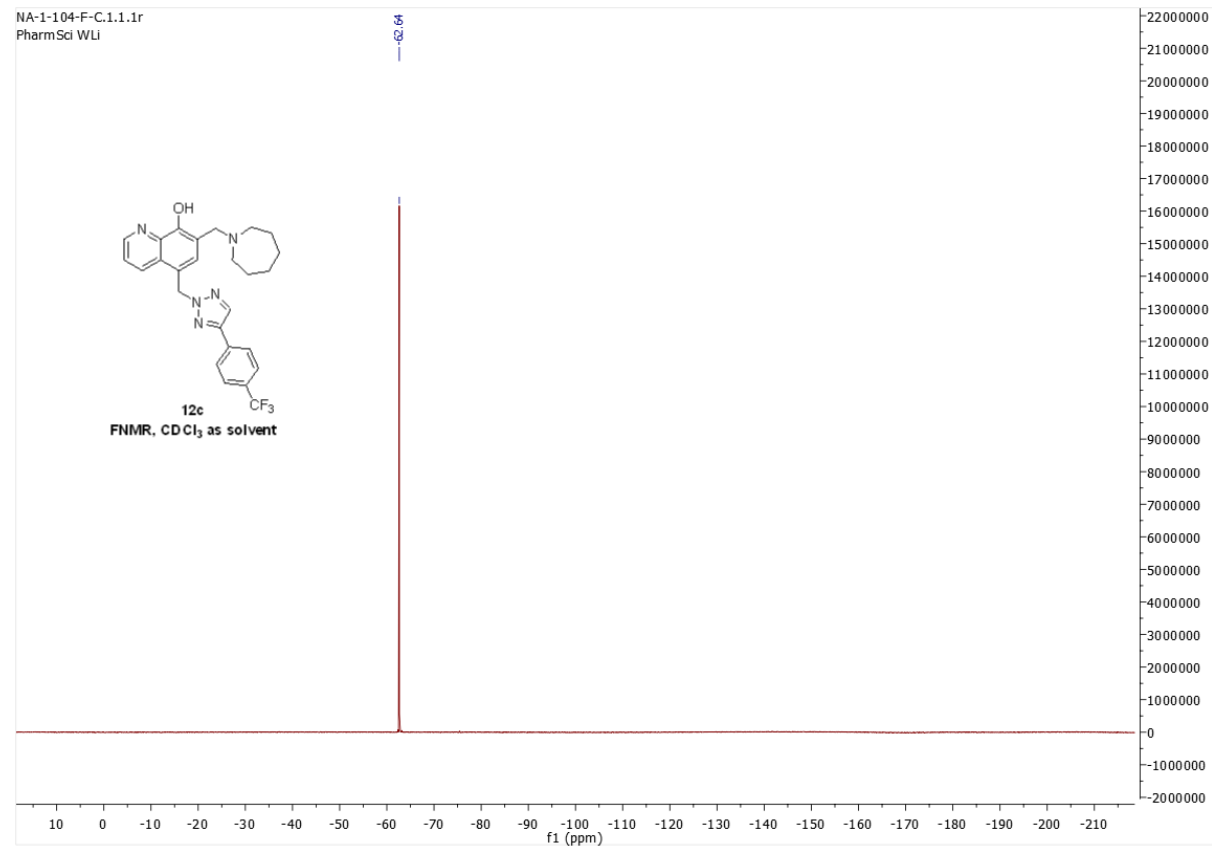

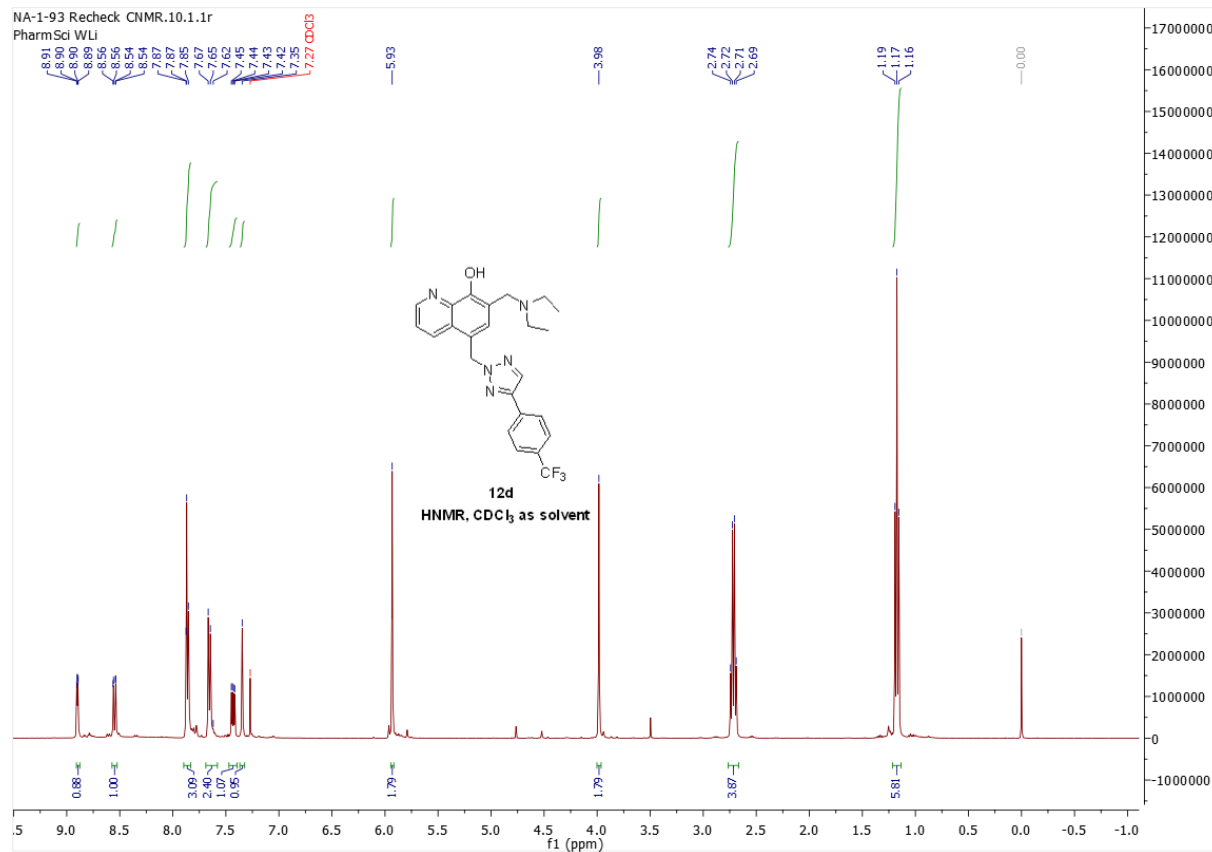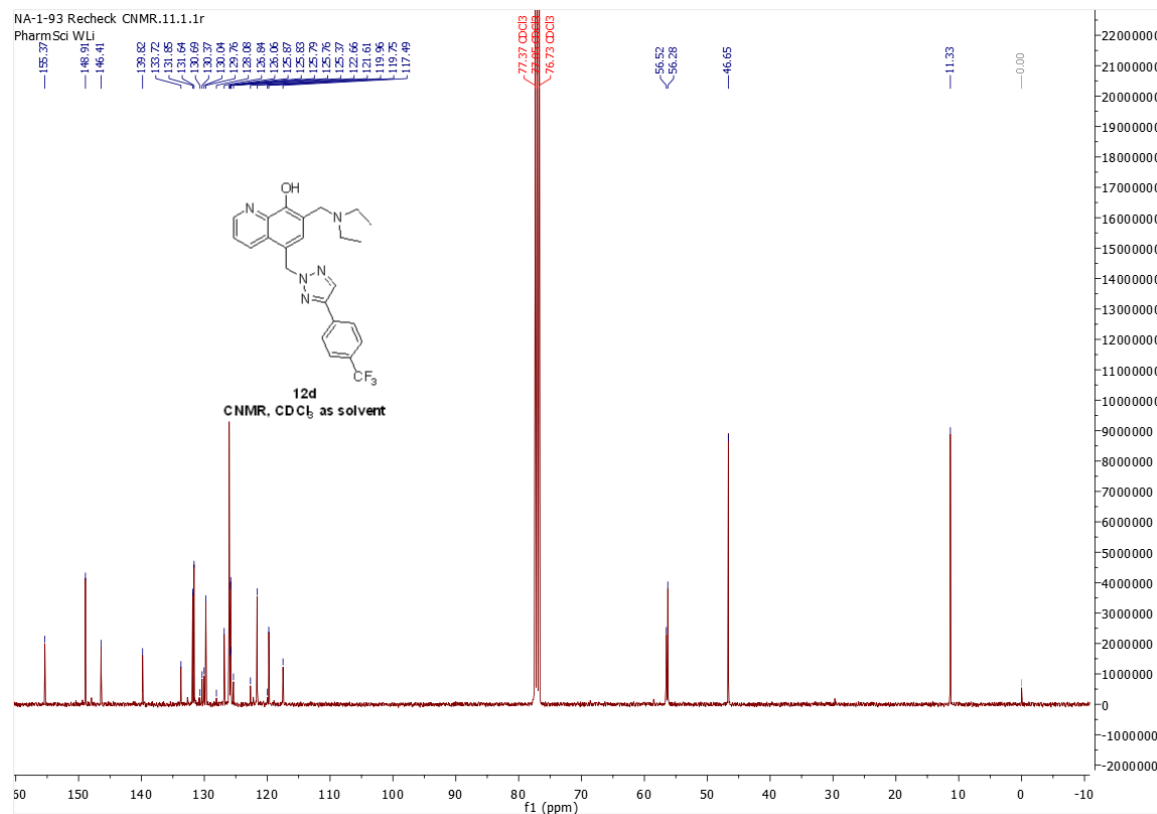

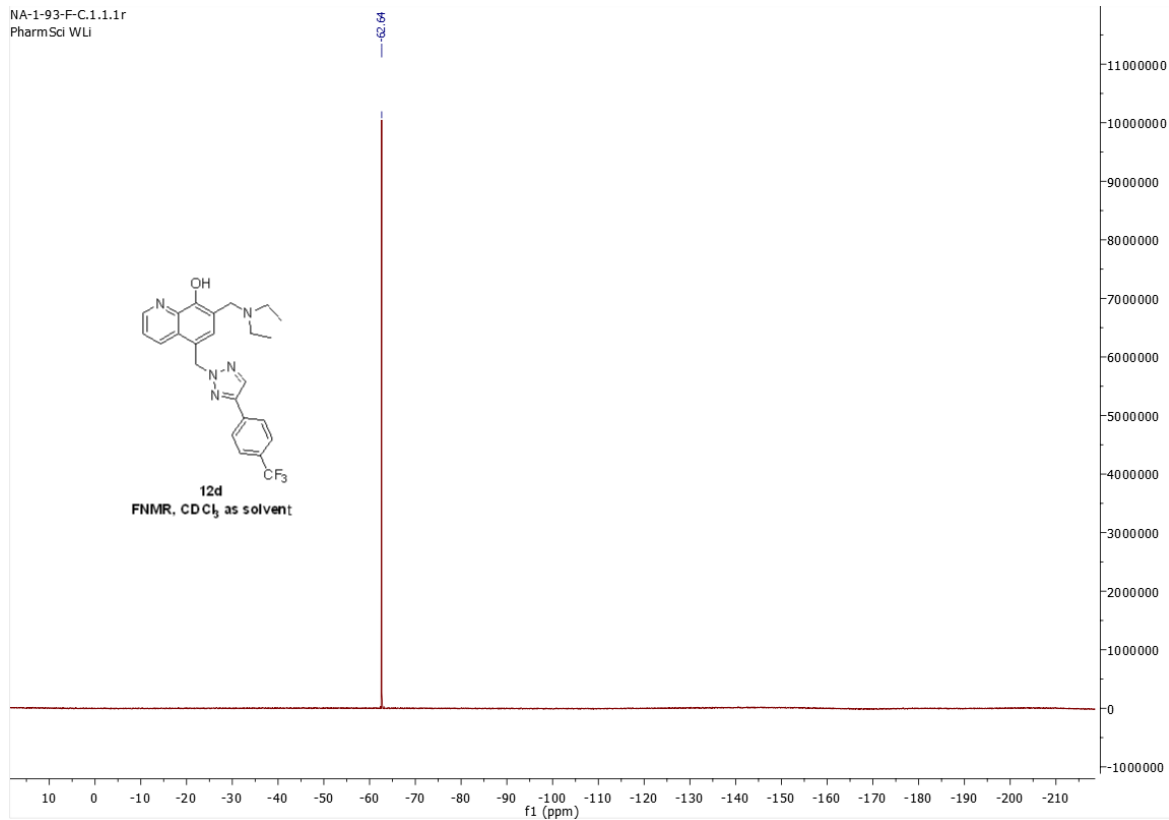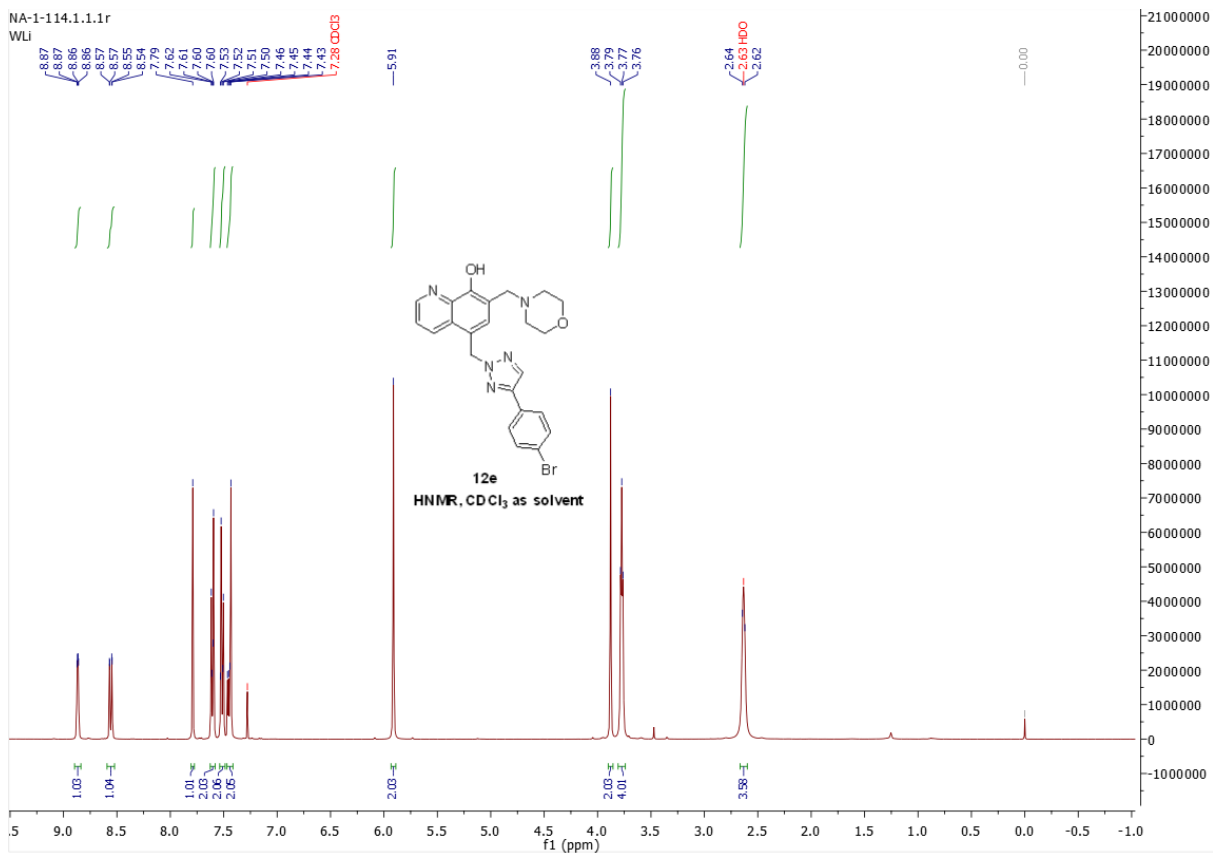

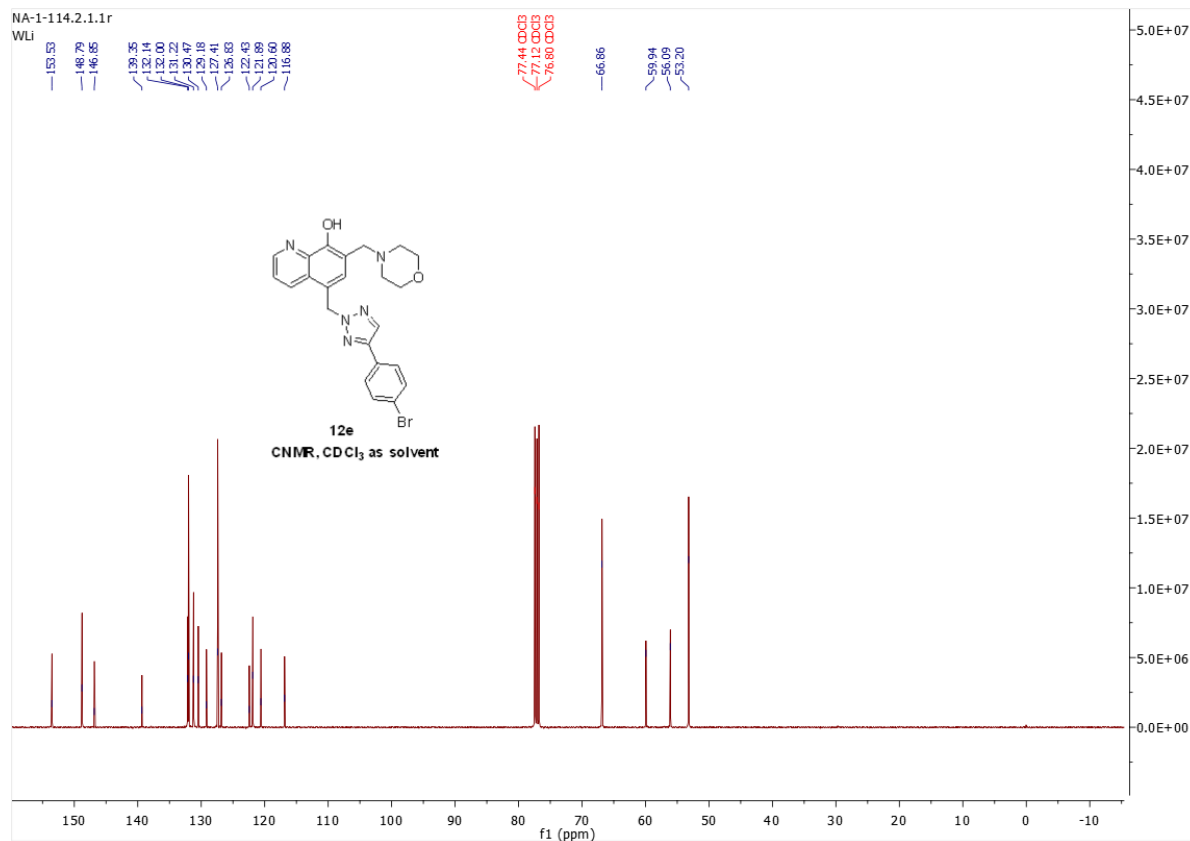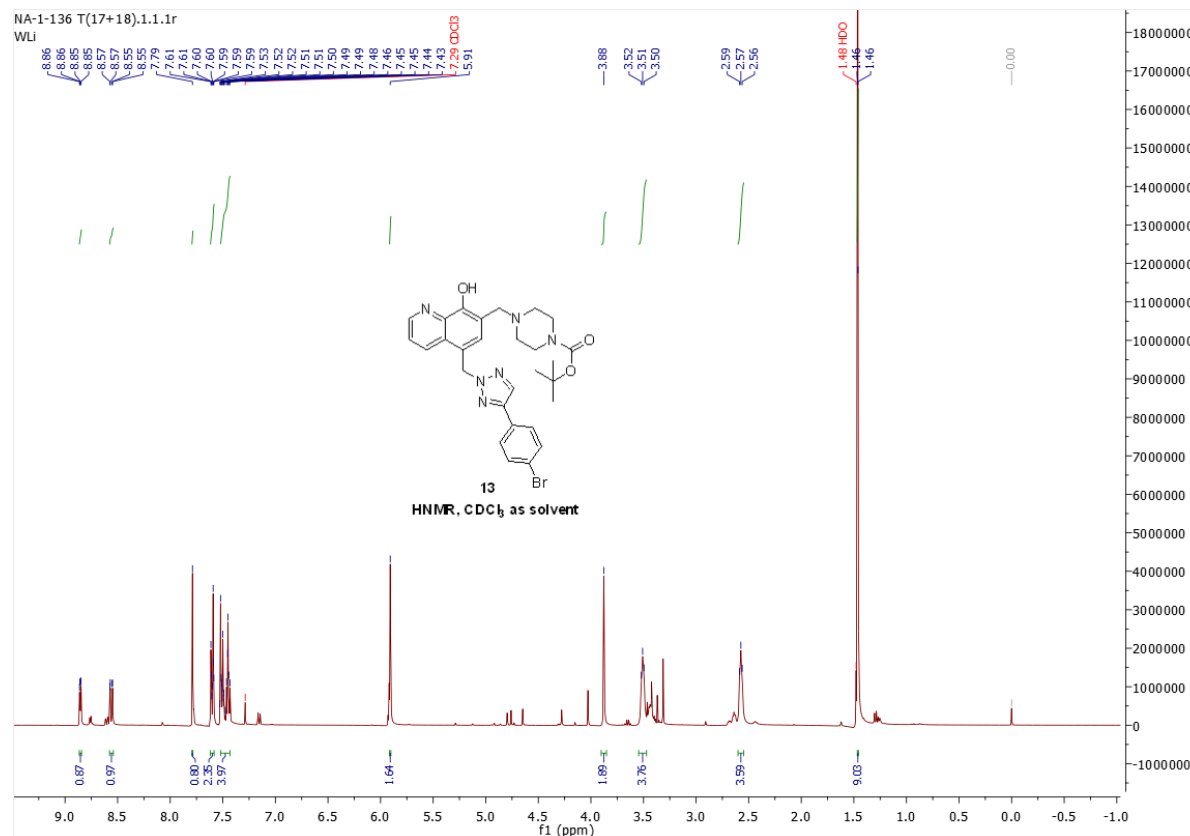

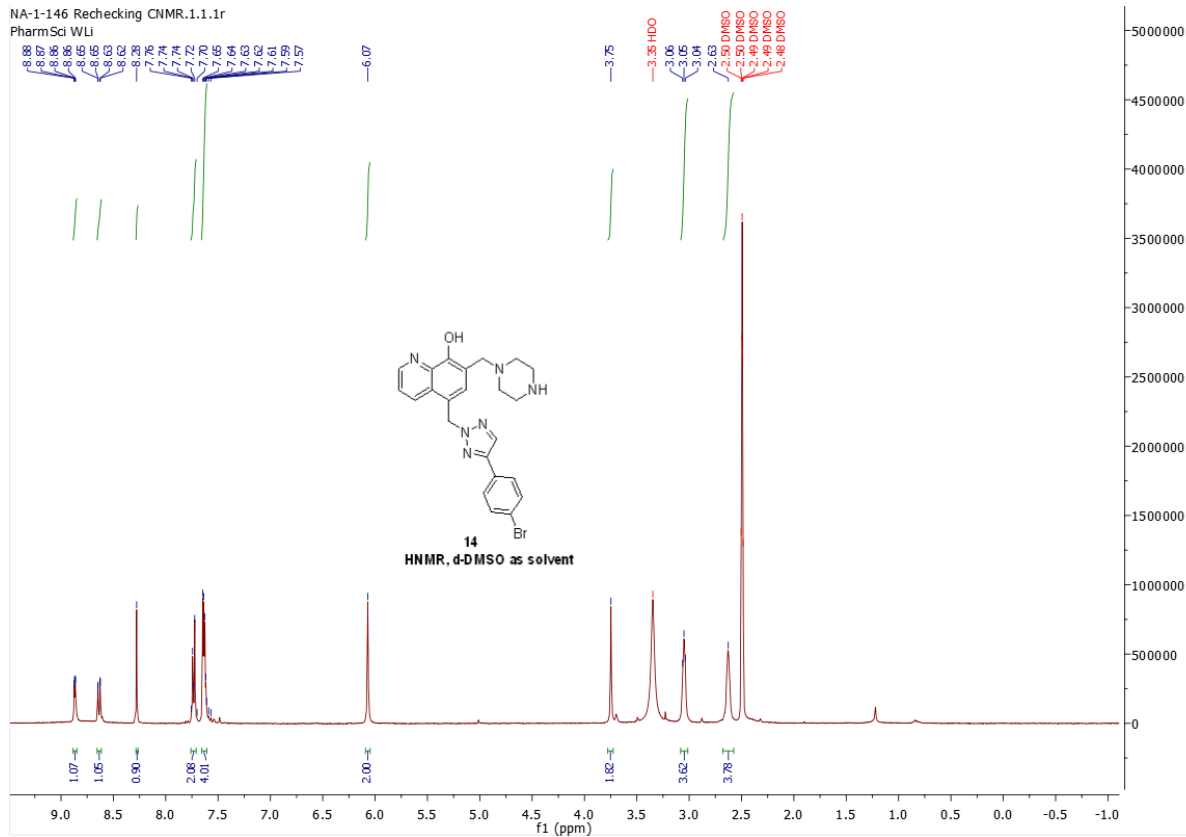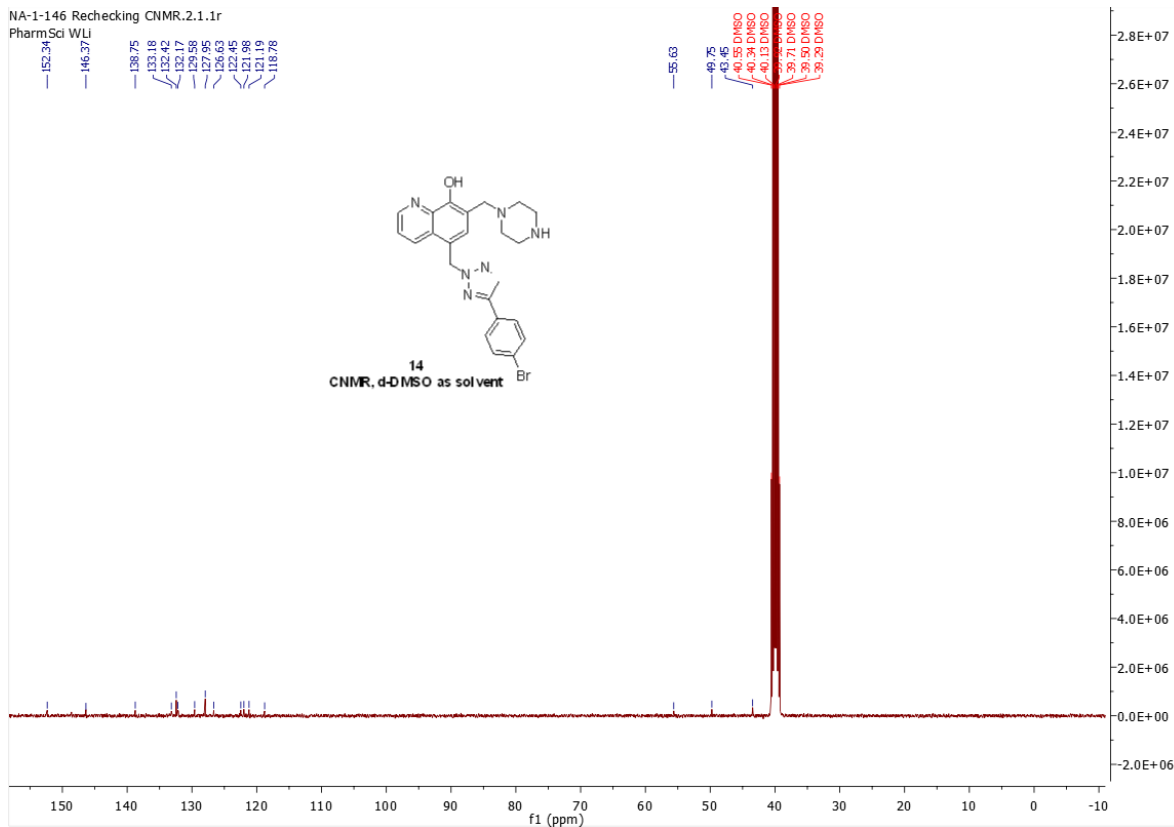



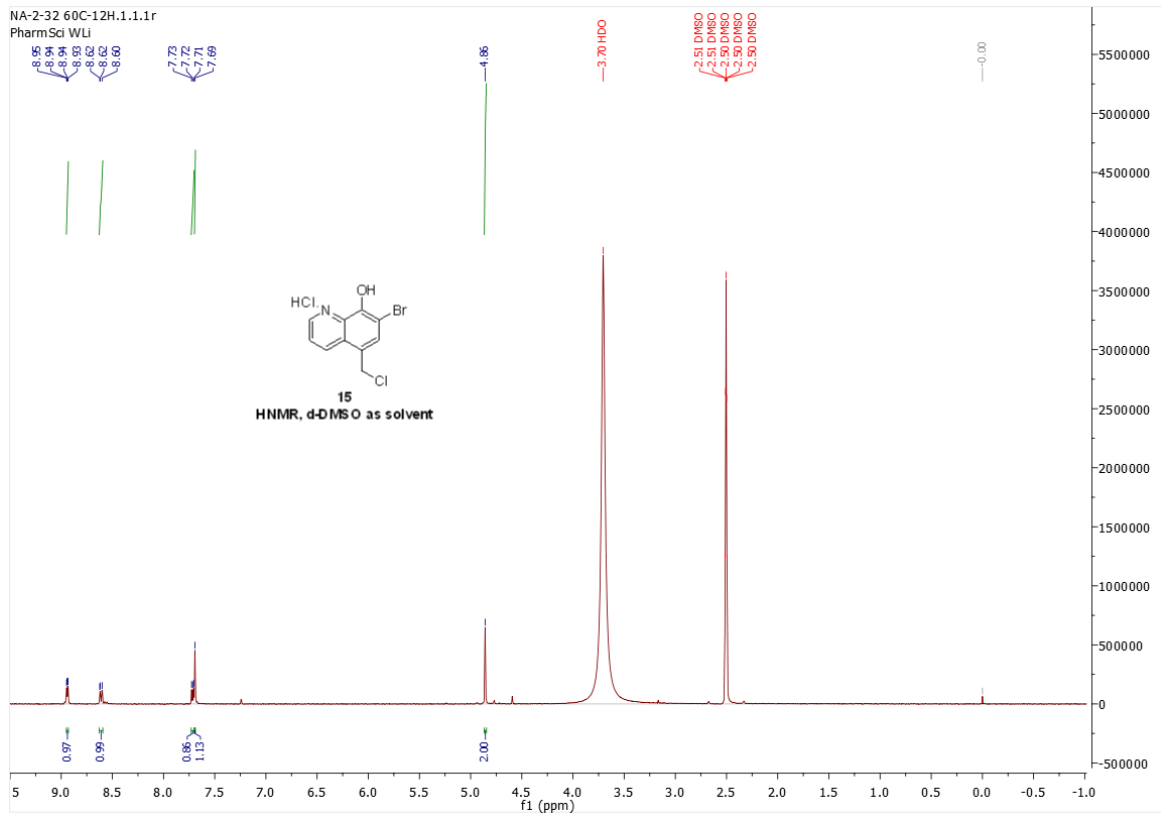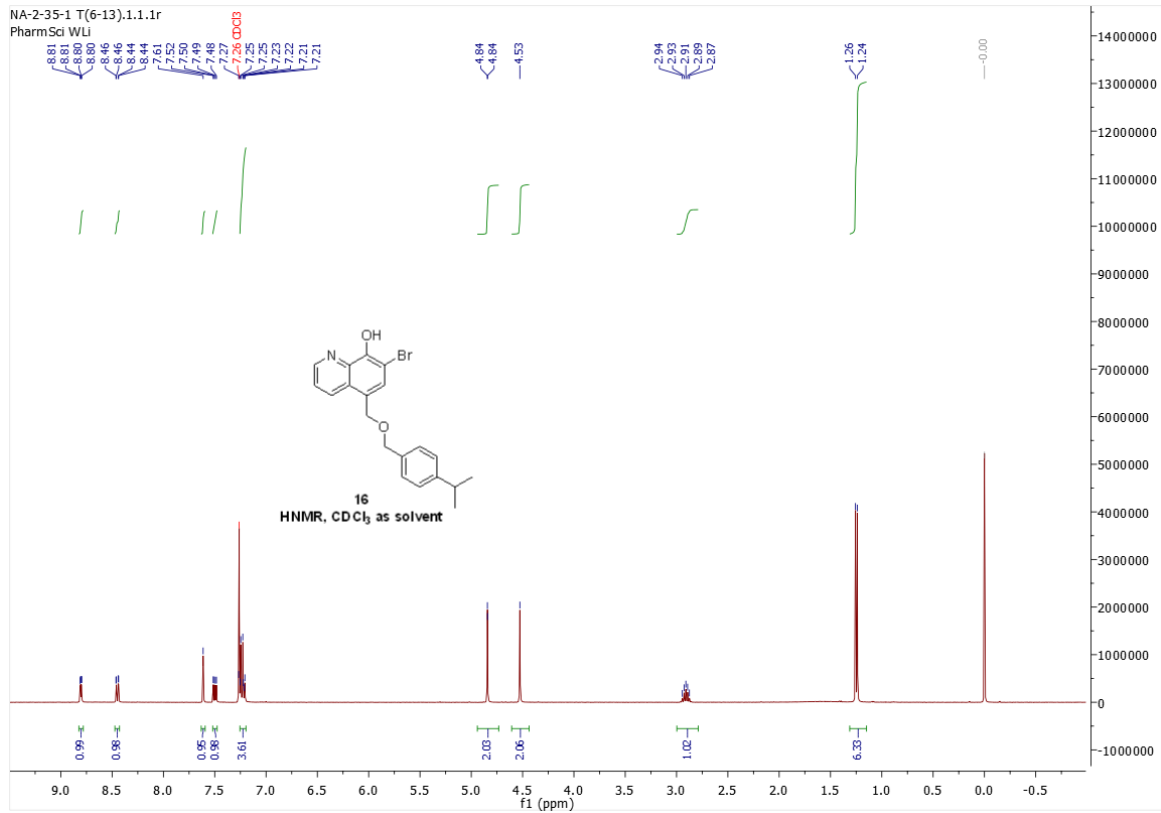

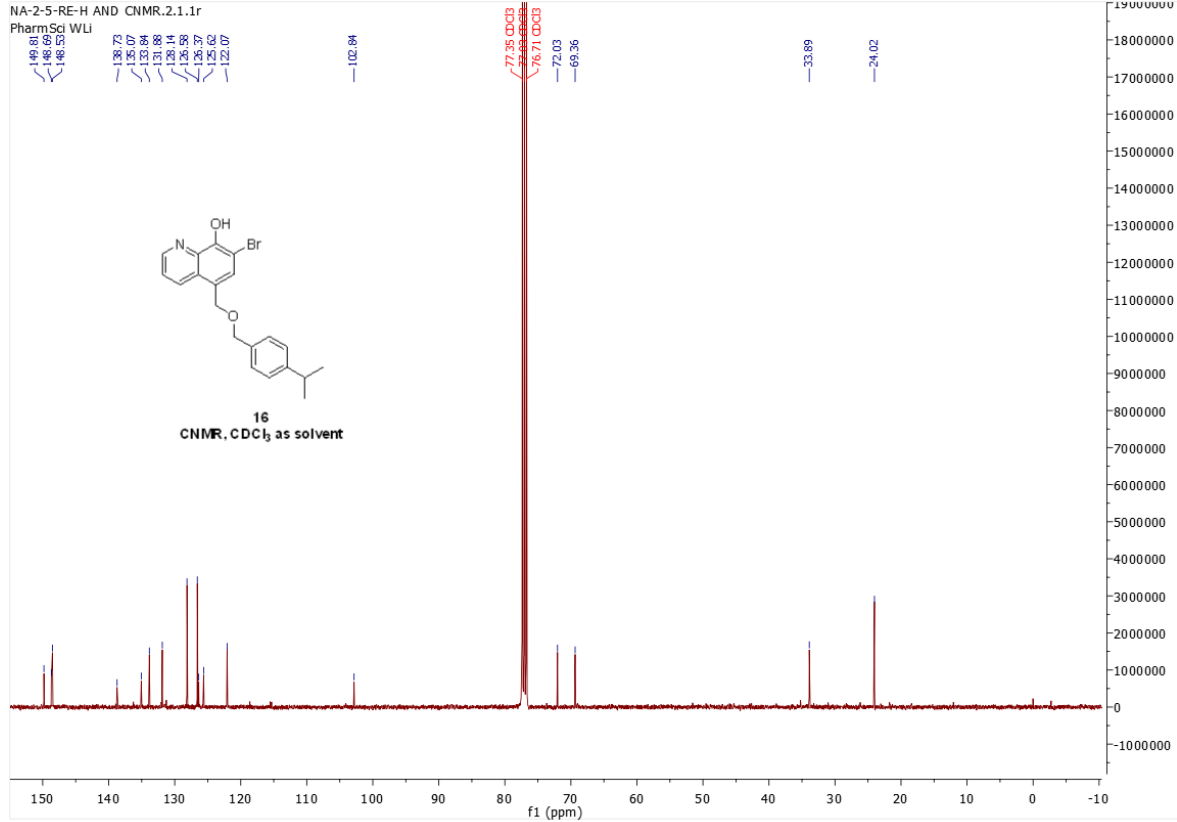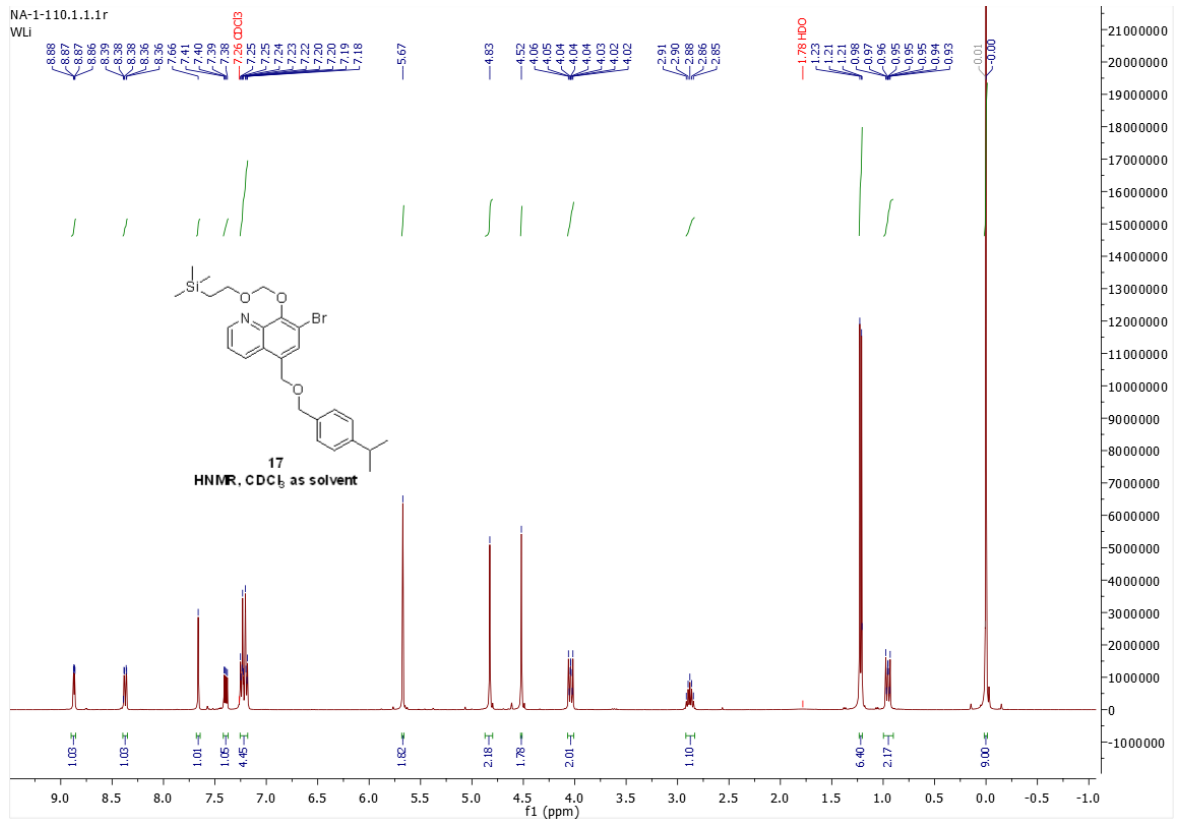

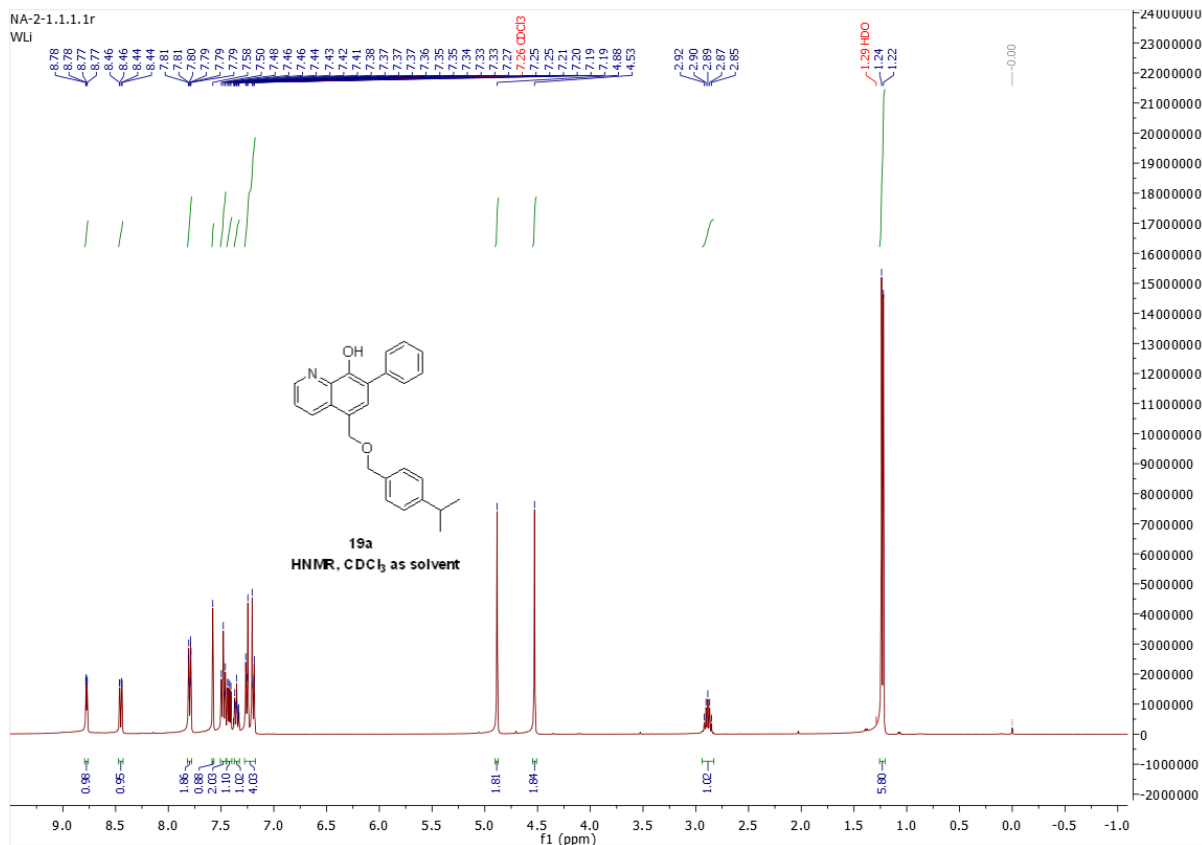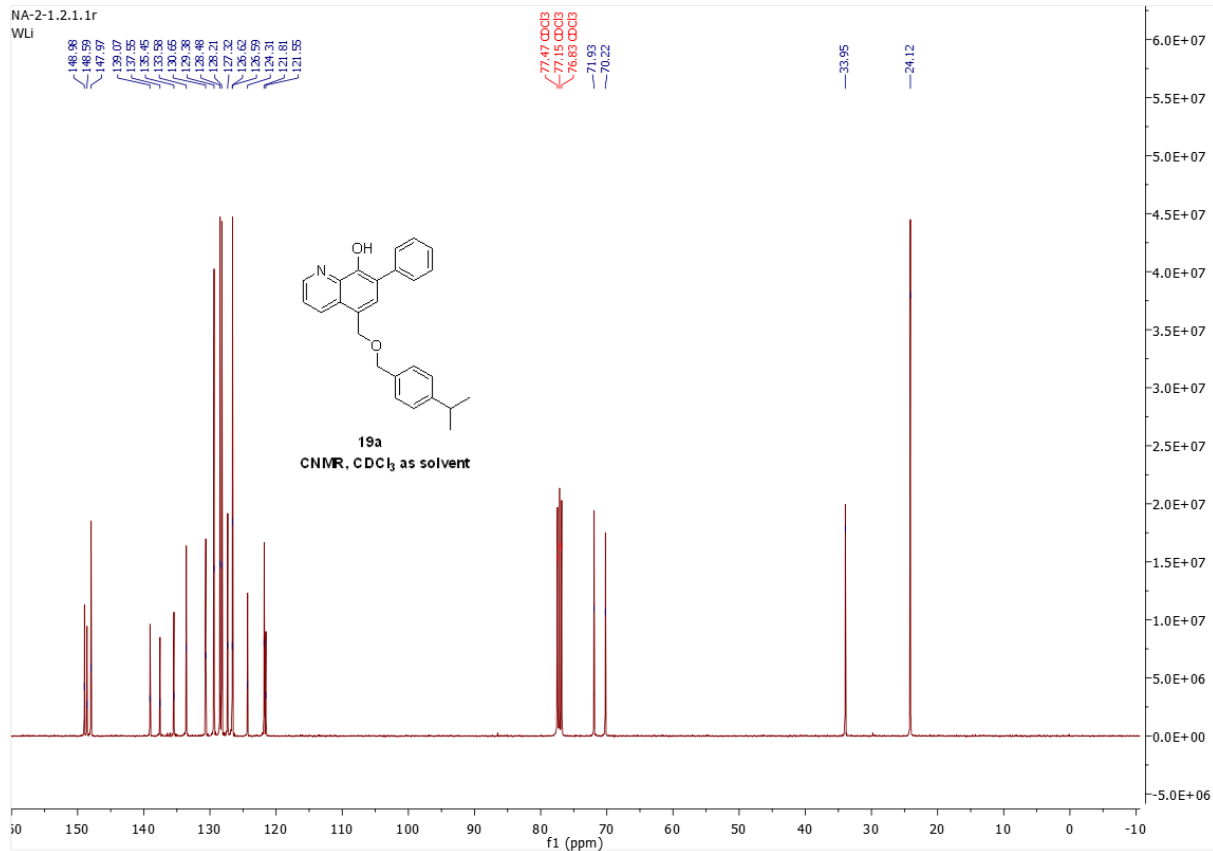

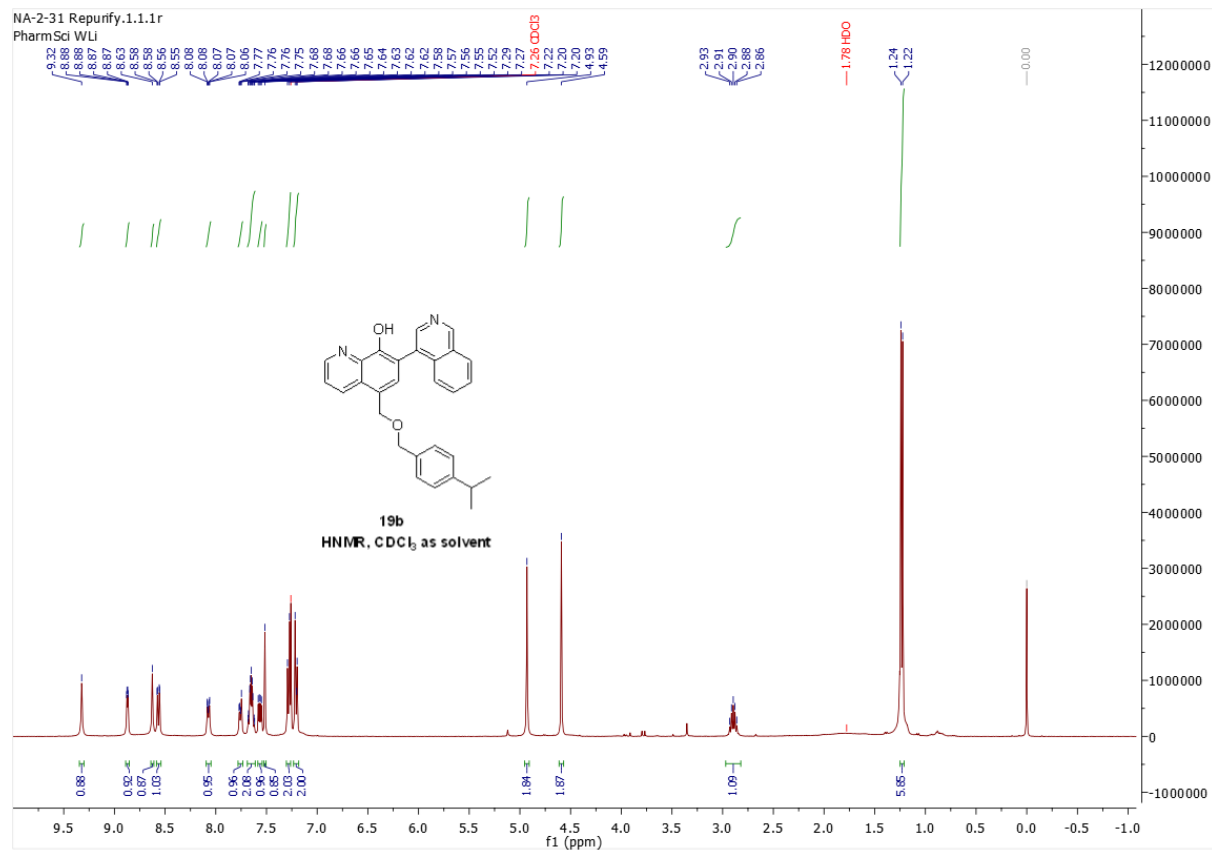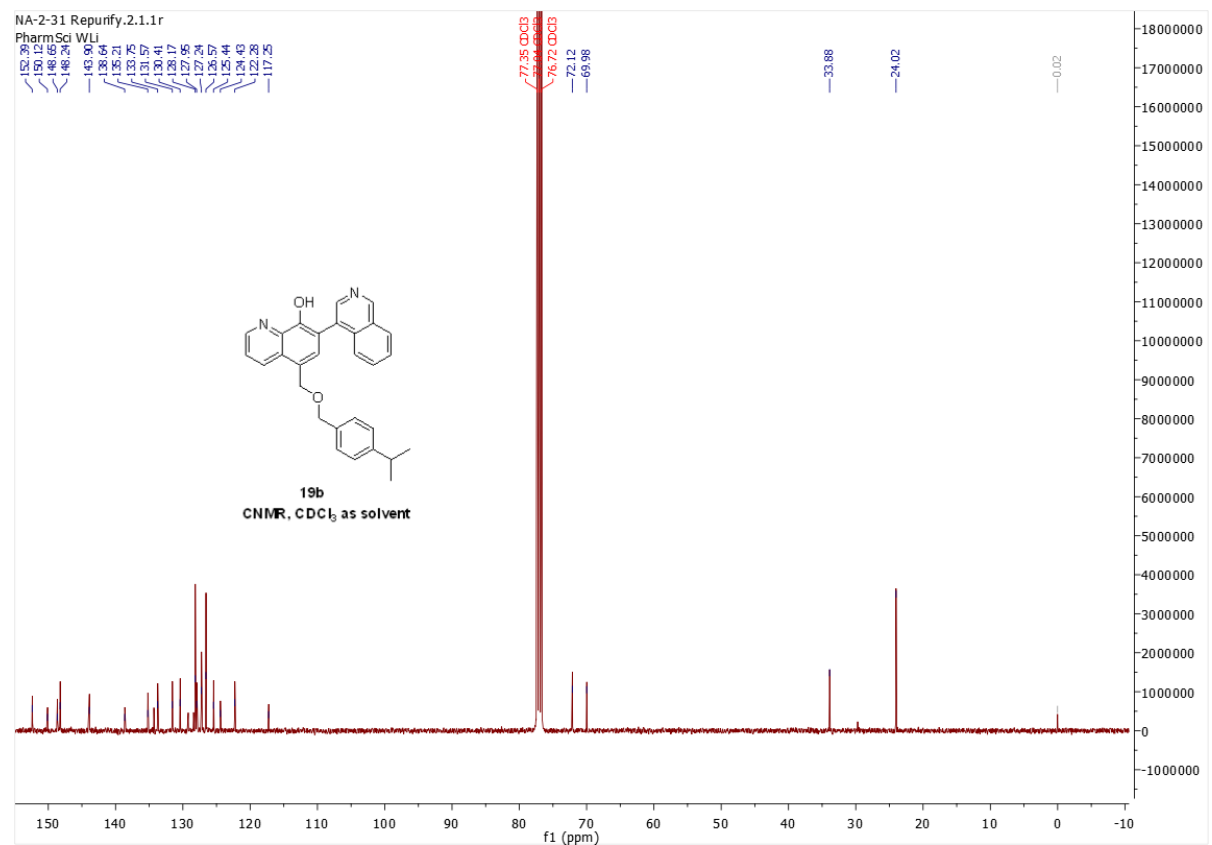

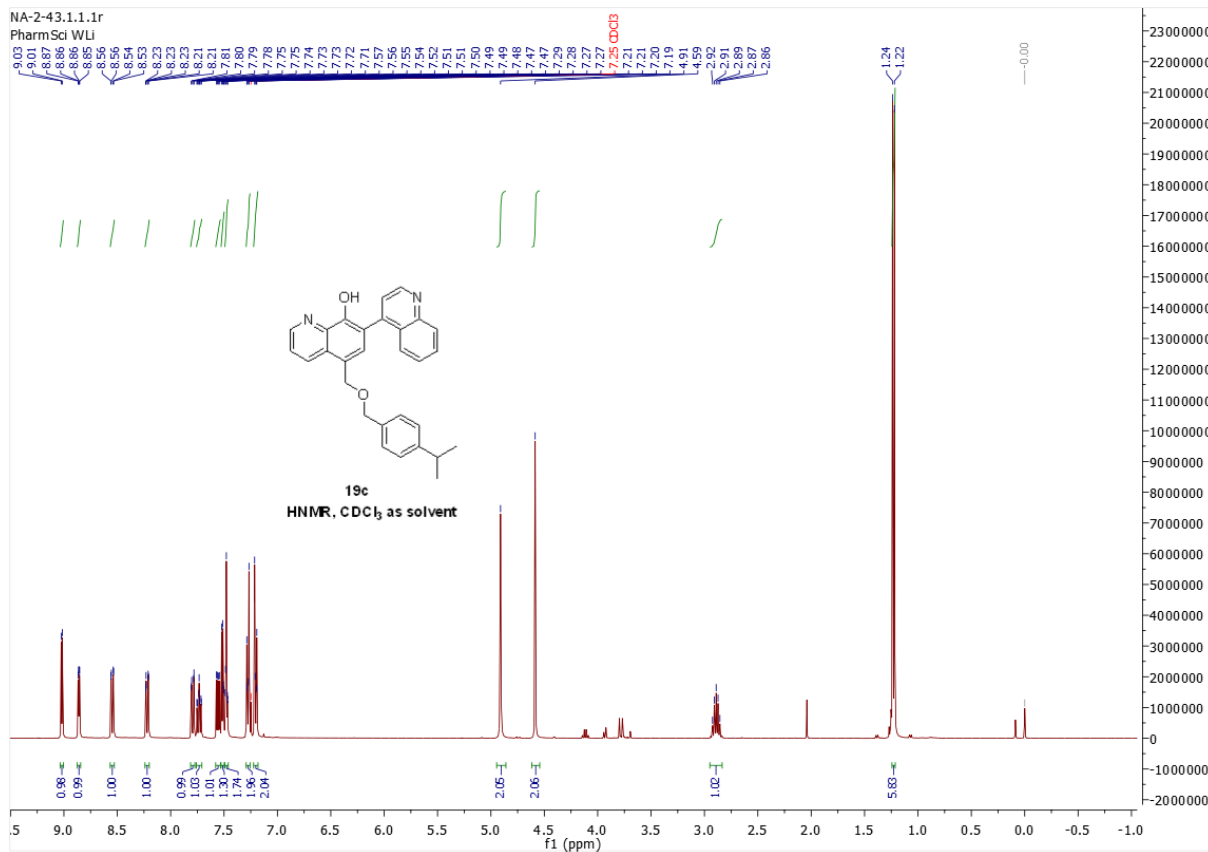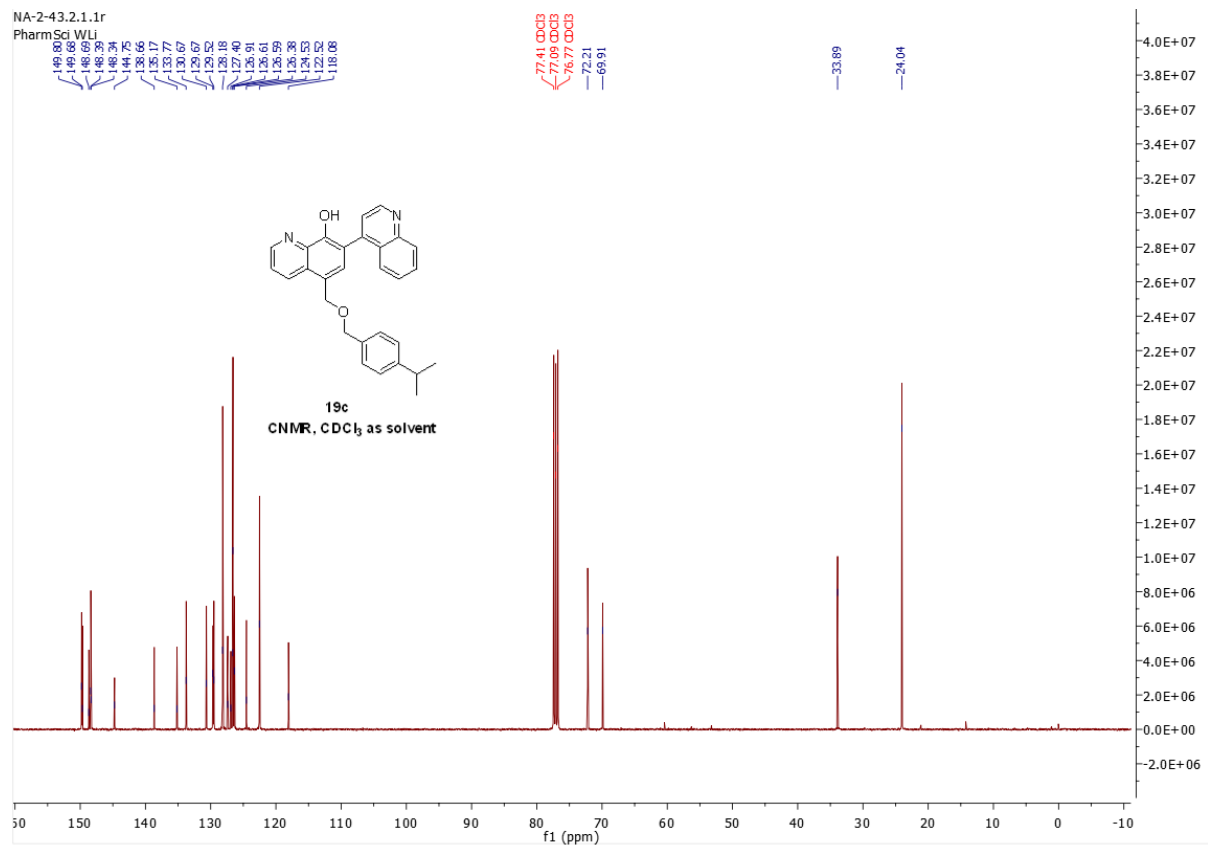

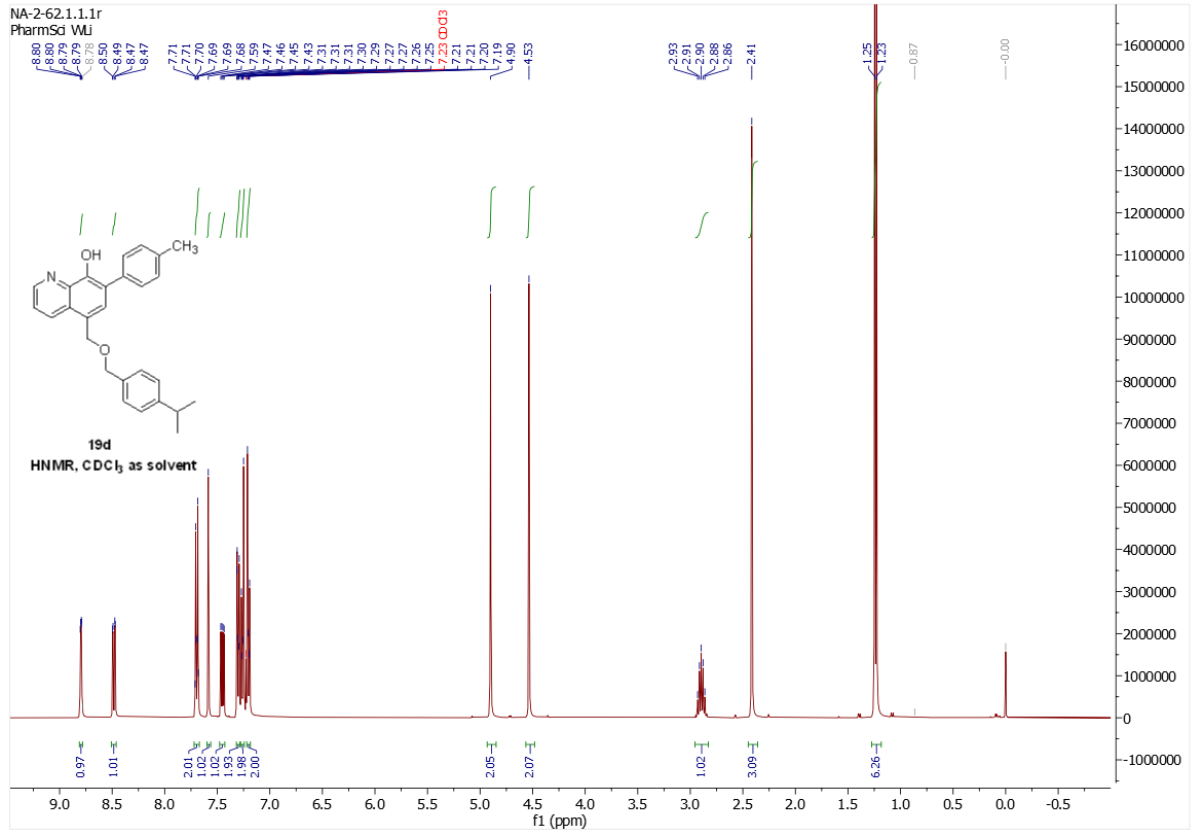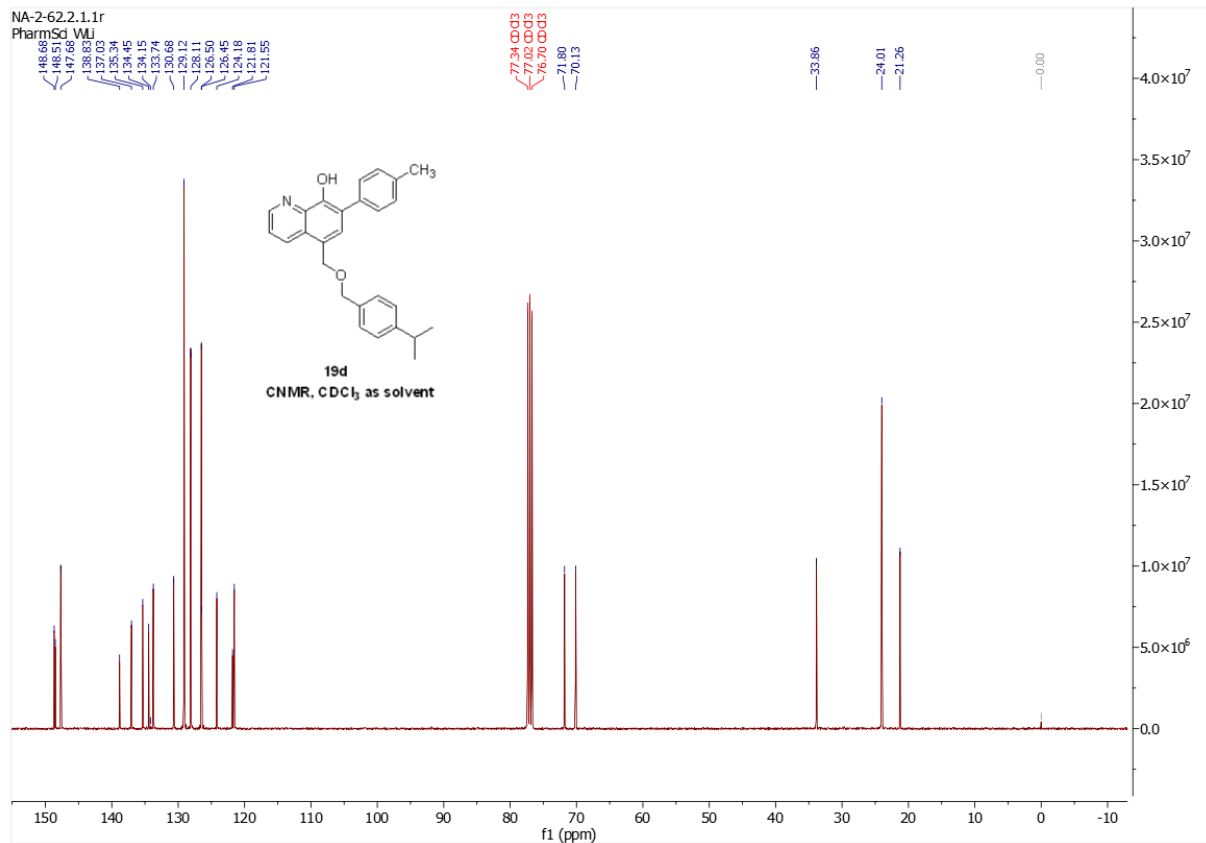

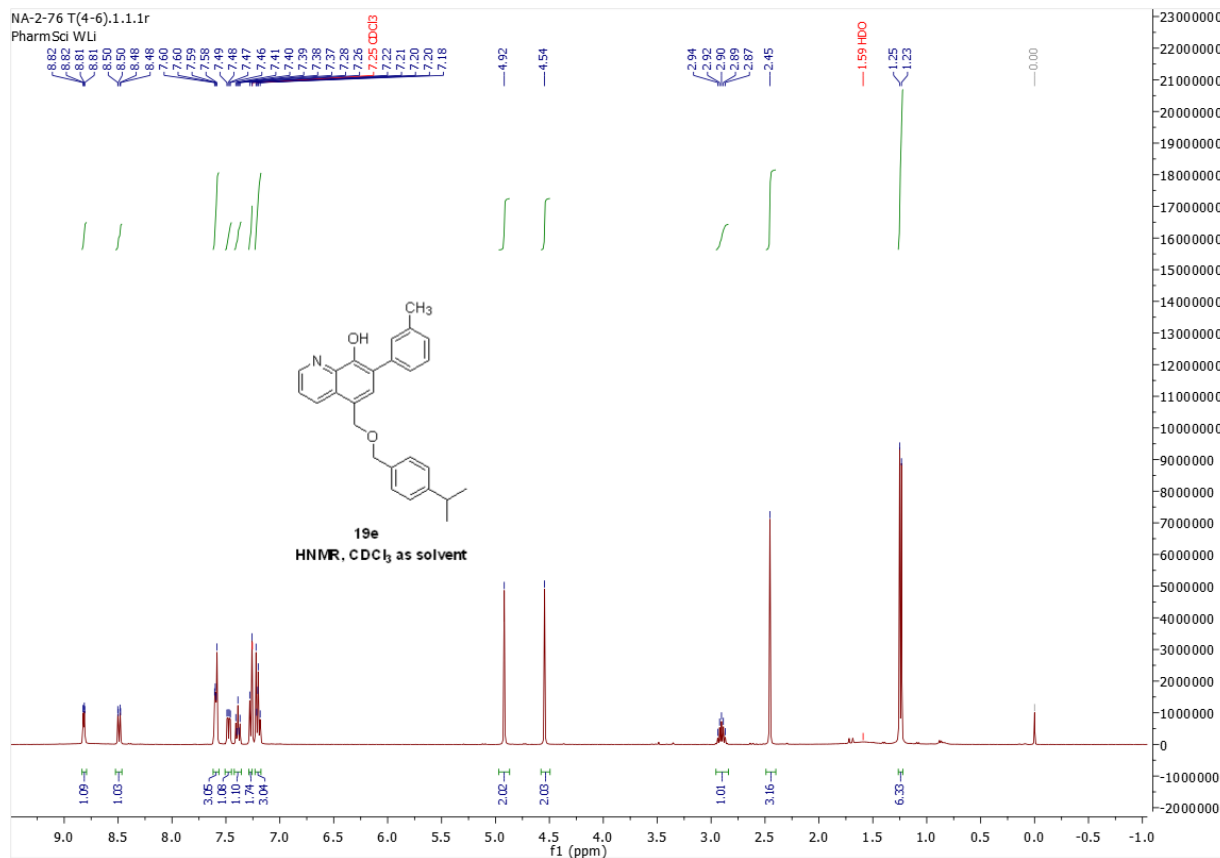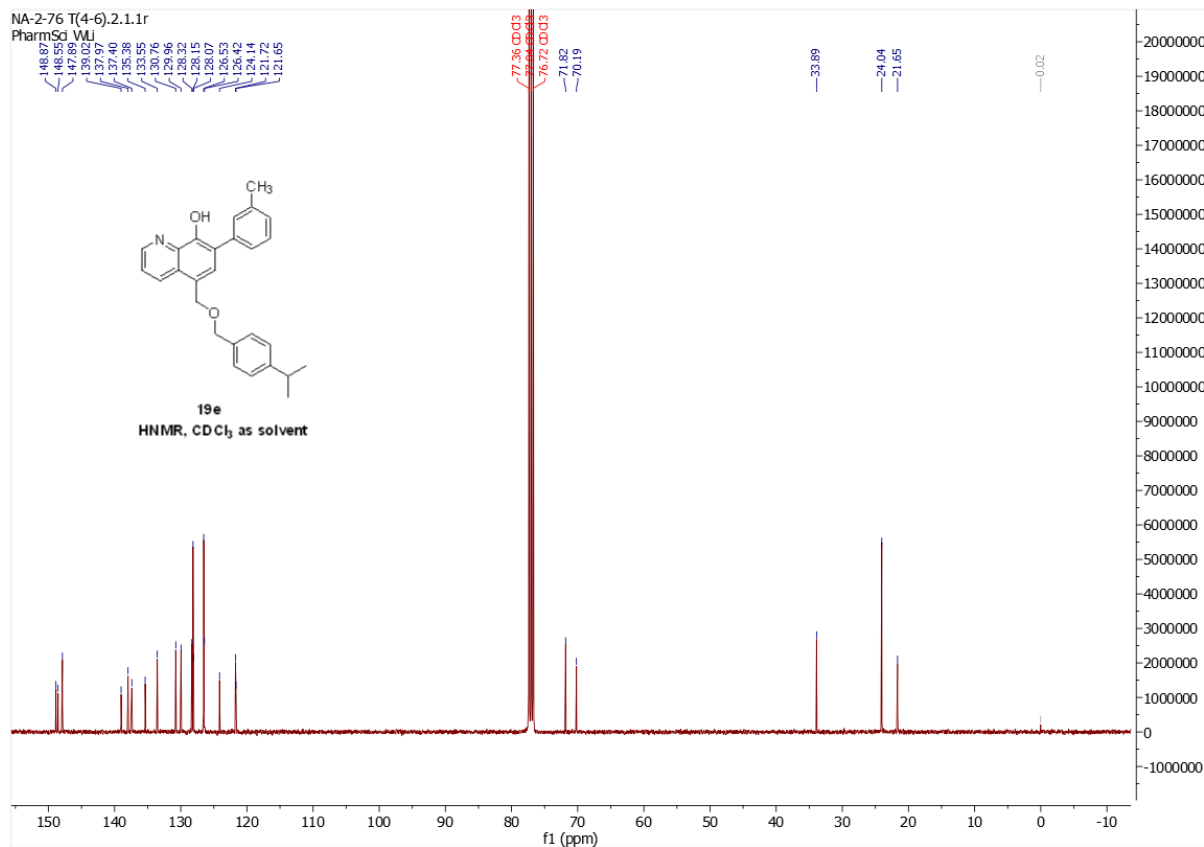

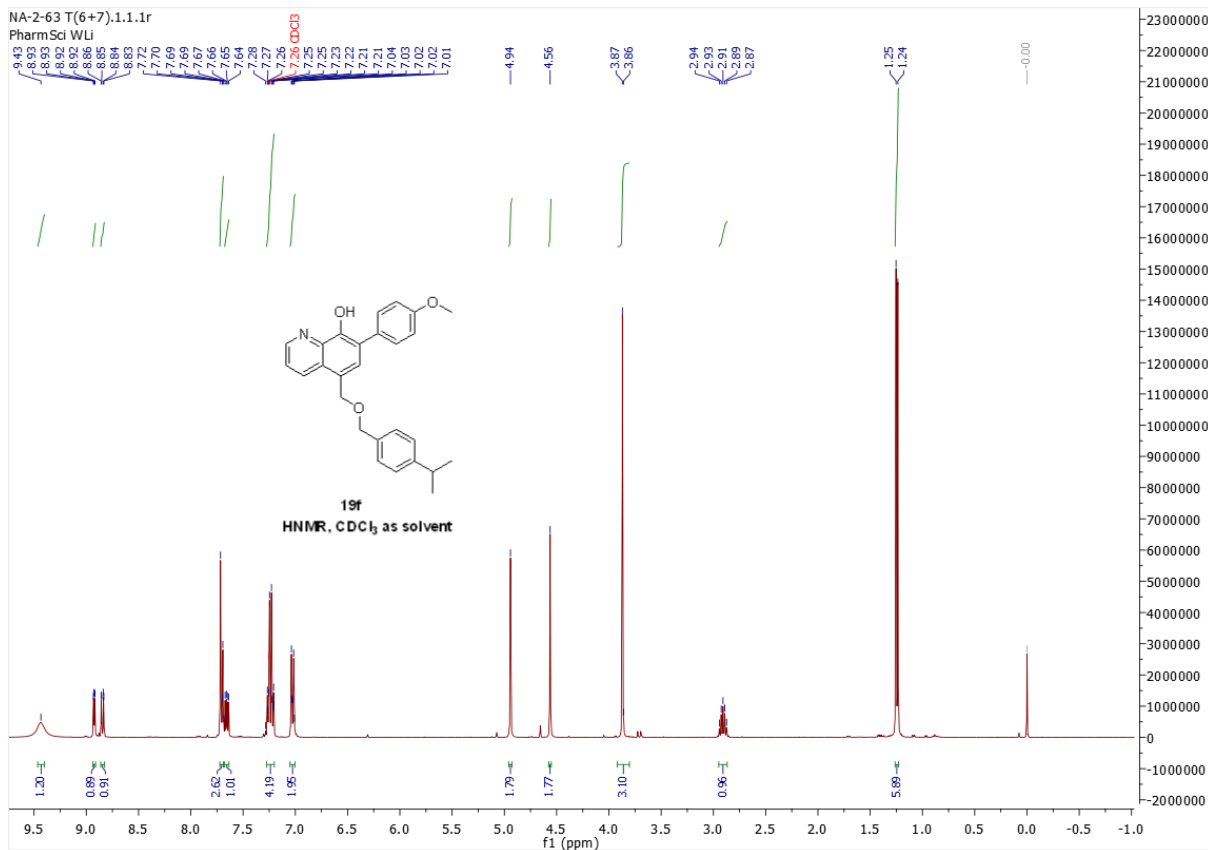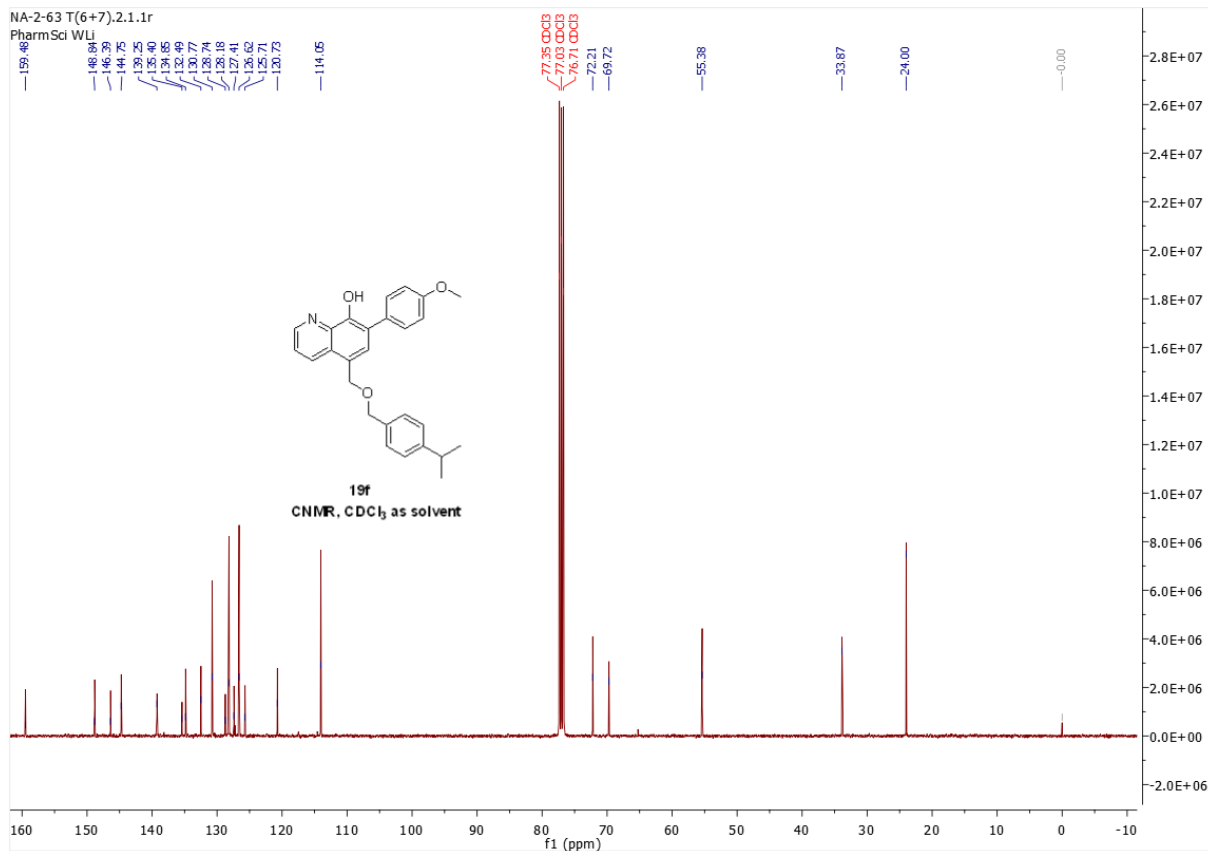



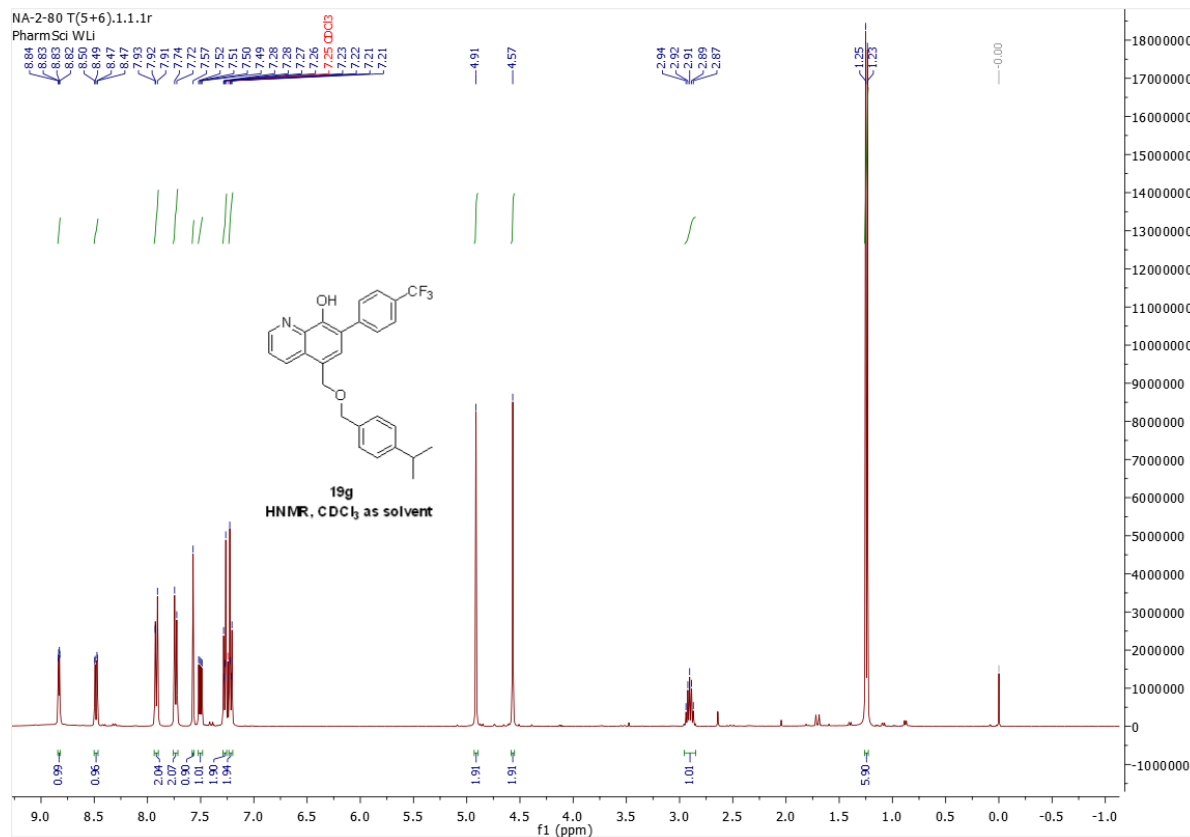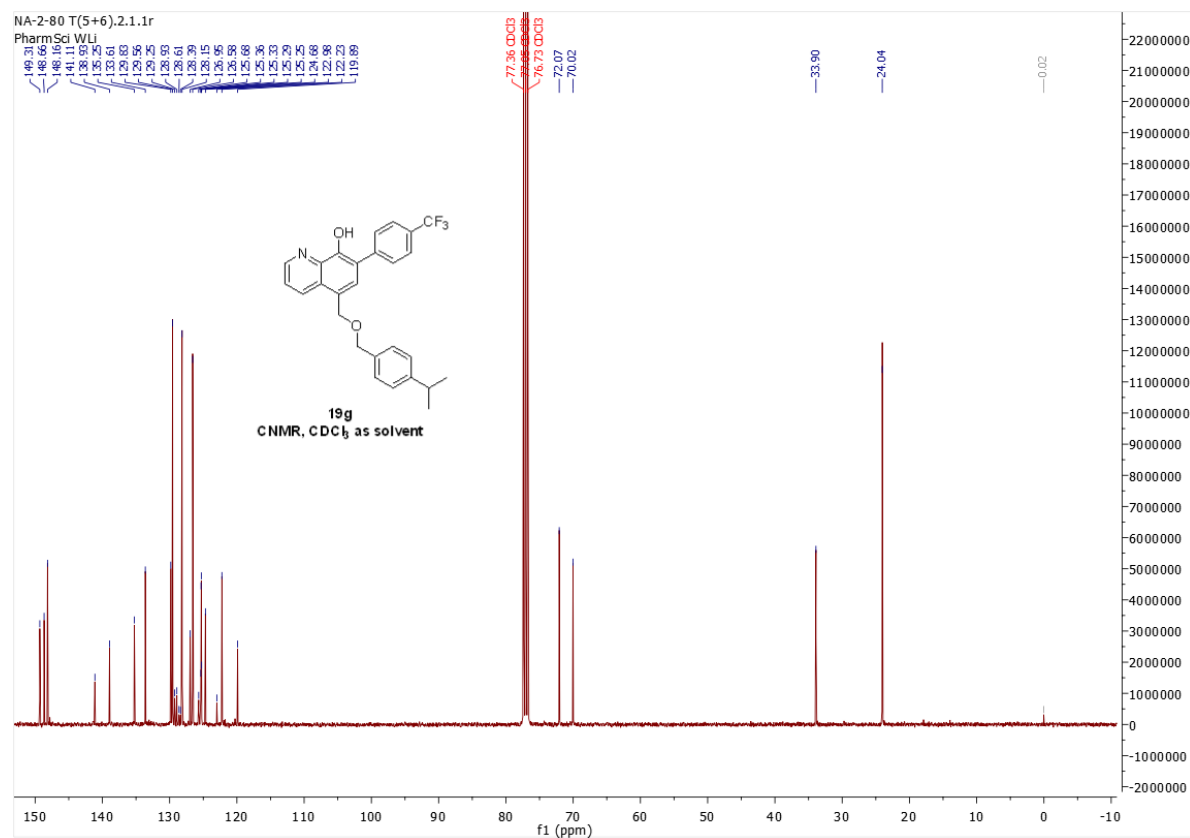

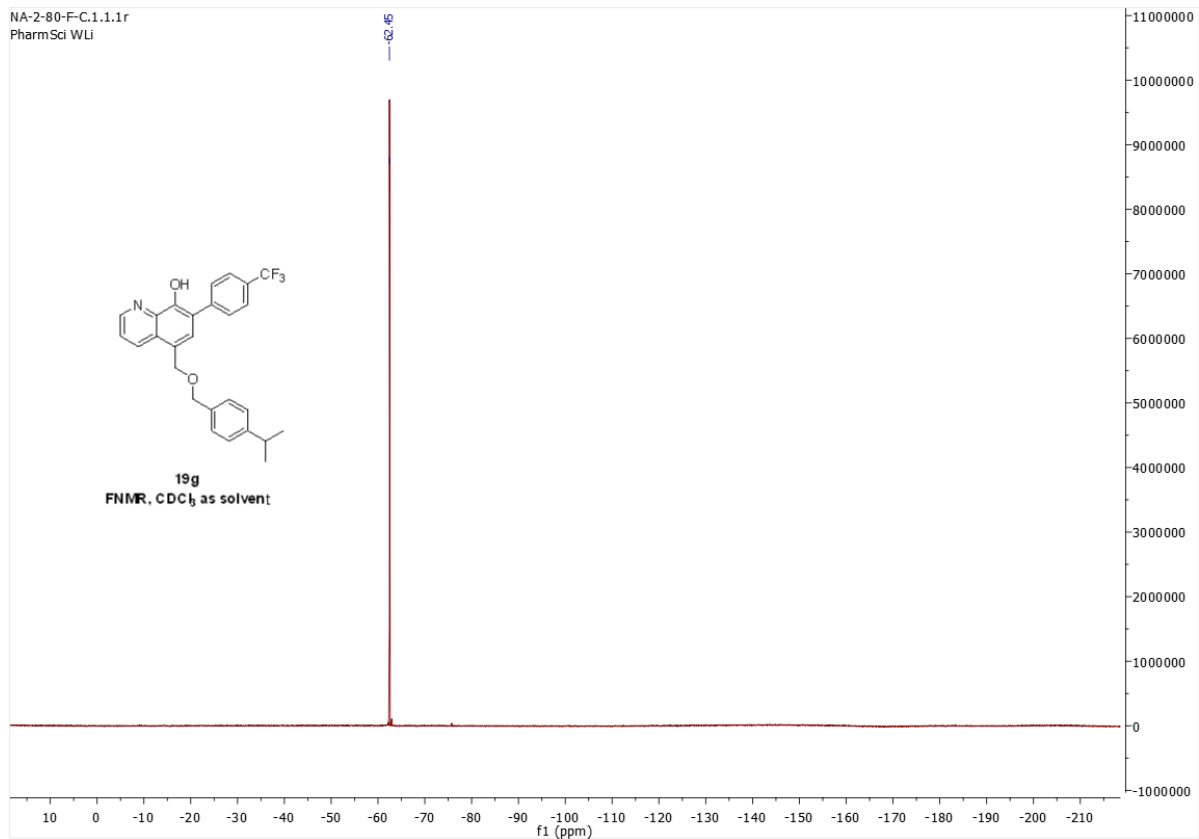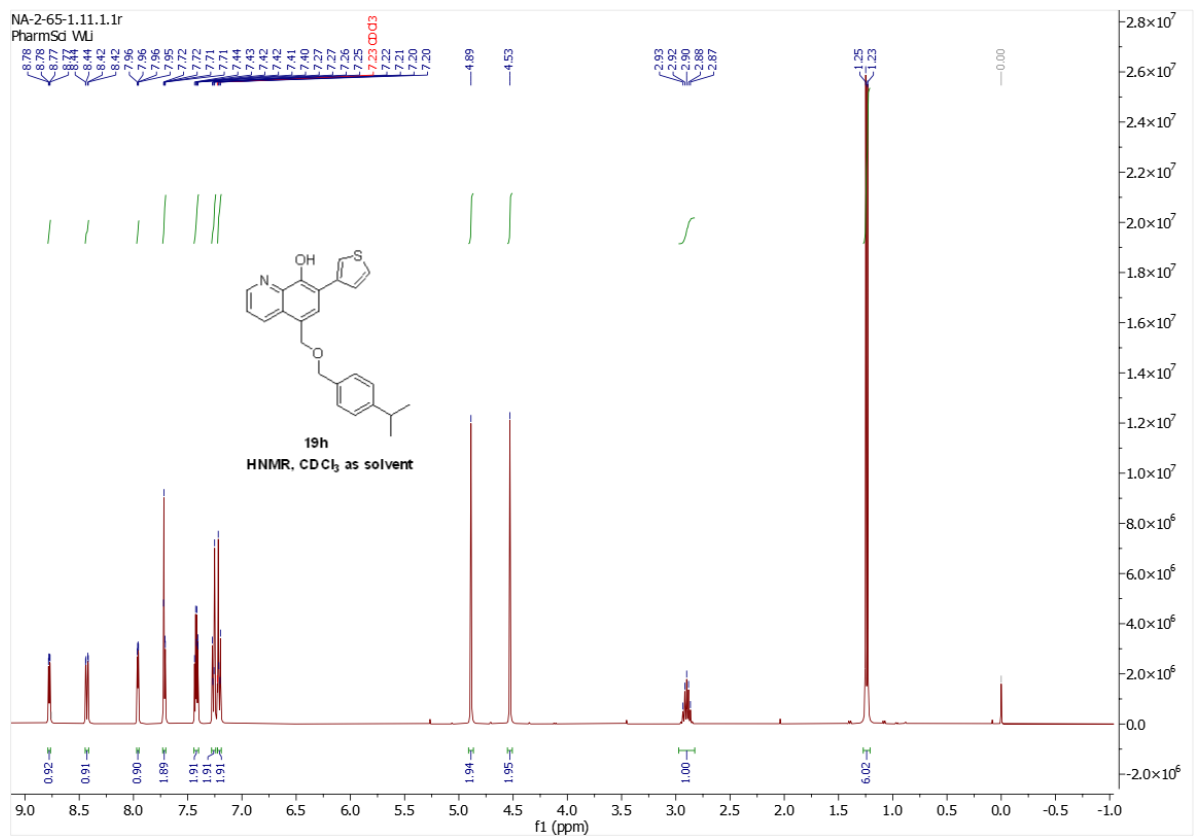

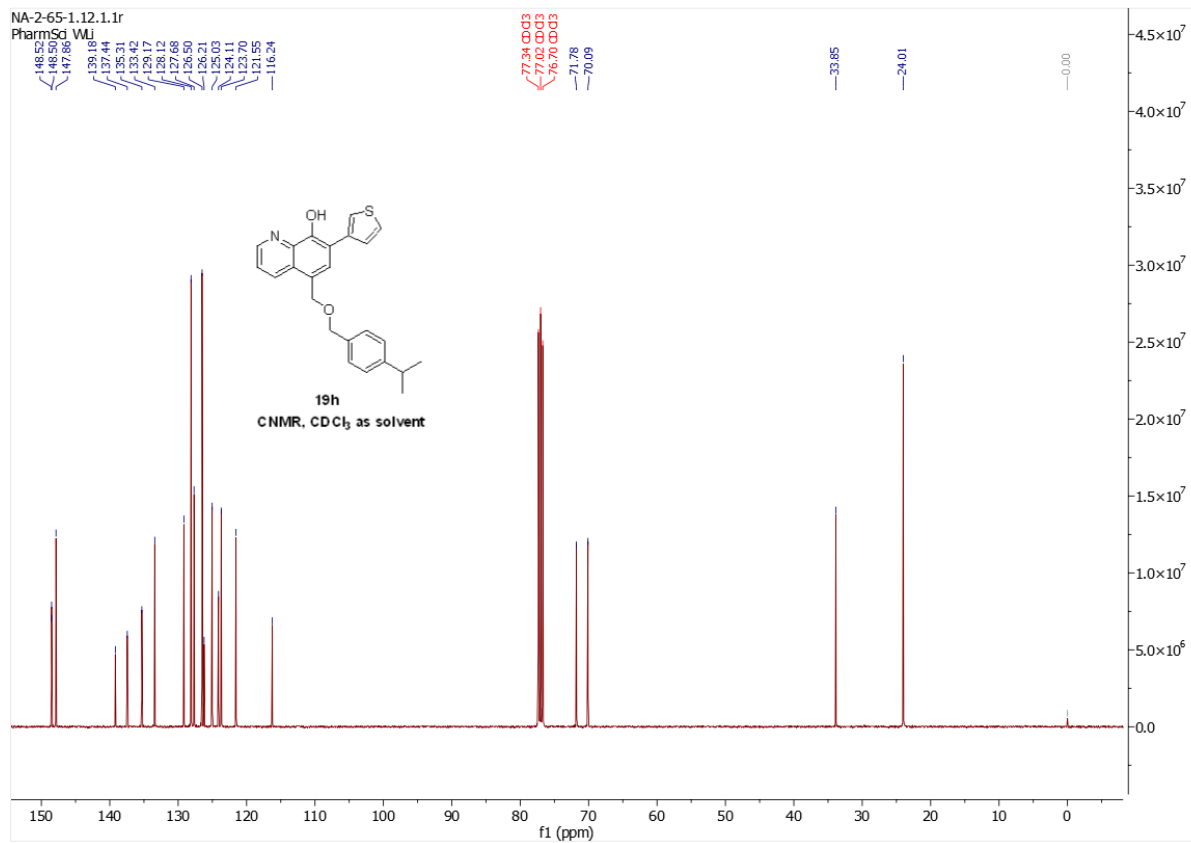

NA-1-55\_July 27 2020 99 (1.749)

1: TOF MS ES+  
7.75e6

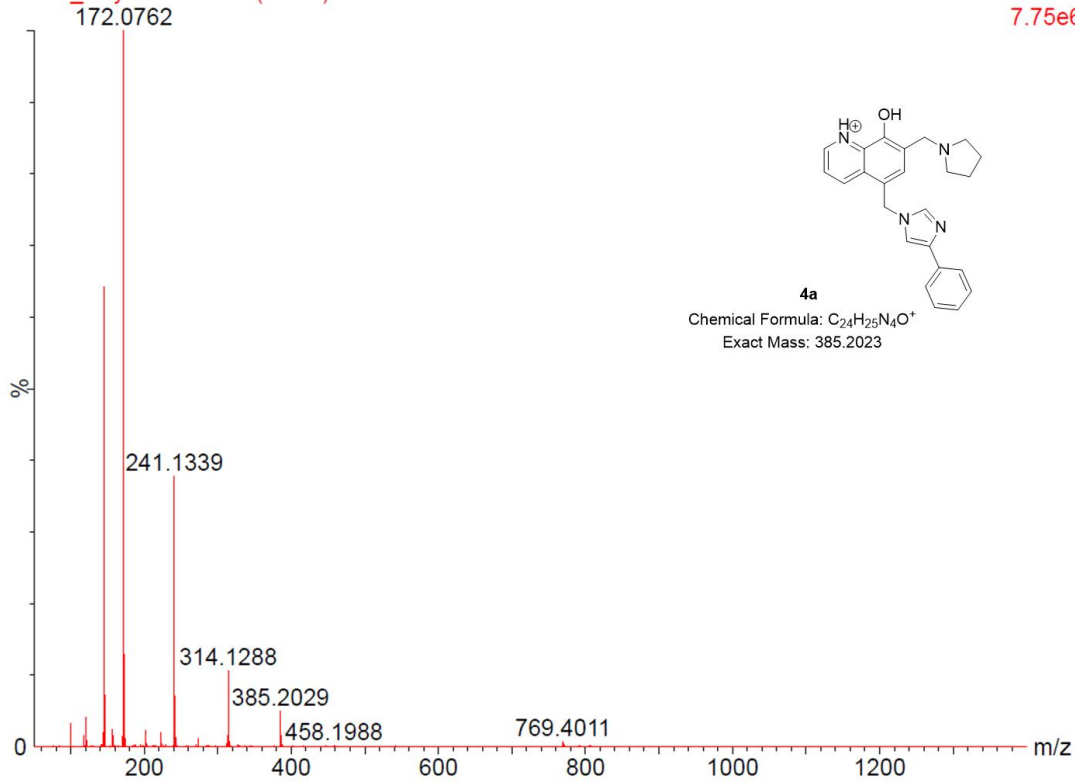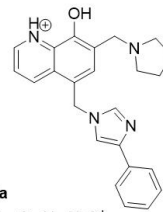

**4a**  
Chemical Formula: C<sub>24</sub>H<sub>25</sub>N<sub>4</sub>O<sup>+</sup>  
Exact Mass: 385.2023

CE: 6.0  
NA-1-52 100 (1.766)

XEVO-G2QTOF#YBA089  
Acq MODE: CID

09-Jul-2020 09:54:43  
Cone V: 40.0  
1: TOF MS ES+  
5.67e7

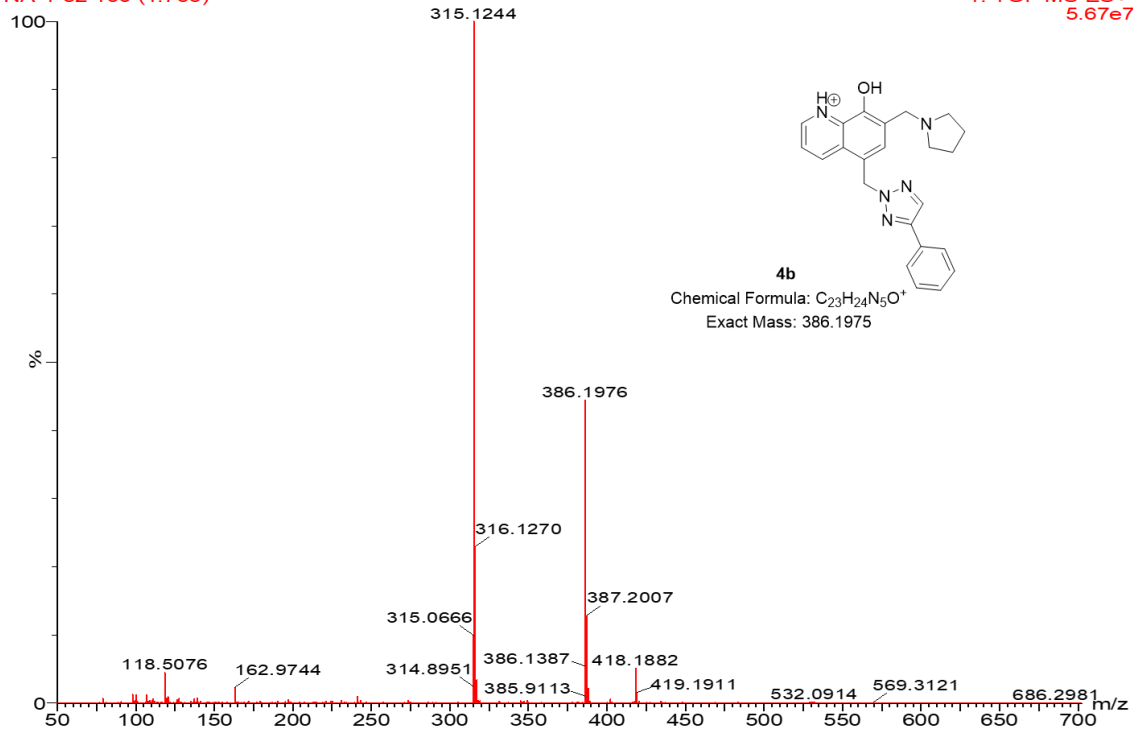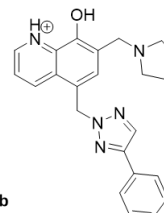

**4b**  
Chemical Formula: C<sub>23</sub>H<sub>24</sub>N<sub>5</sub>O<sup>+</sup>  
Exact Mass: 386.1975

CE: 6.0  
NA-2-20 109 (1.928)

XEVO-G2TOF#YBA089  
Acq MODE: CID

09-Jul-2020 12:57:16  
Cone V: 40.0  
1: TOF MS ES+  
5.95e7

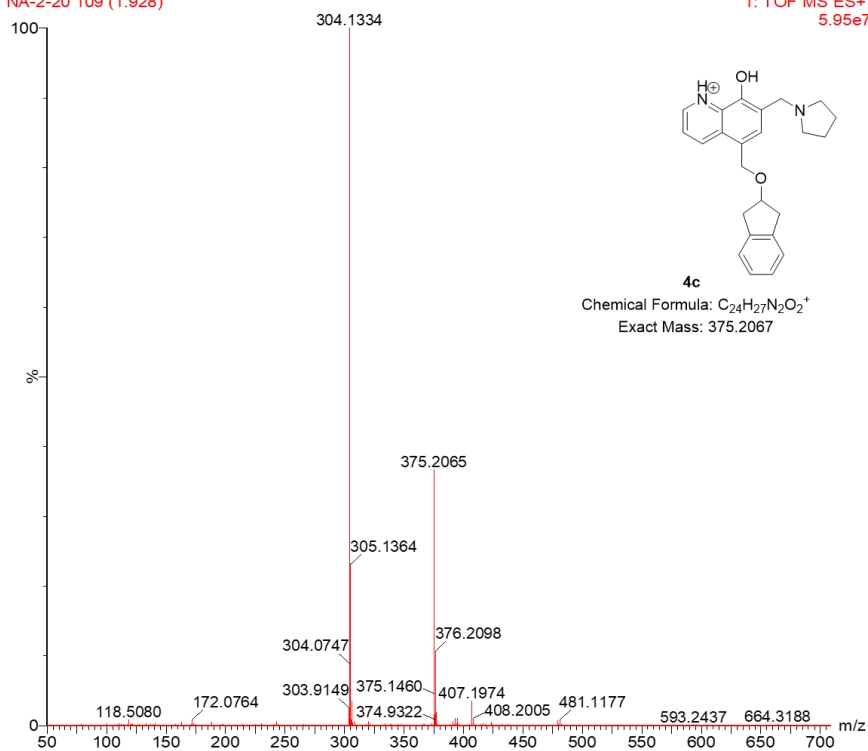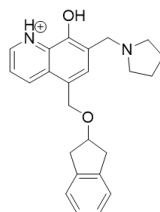

**4c**  
Chemical Formula: C<sub>24</sub>H<sub>27</sub>N<sub>2</sub>O<sub>2</sub><sup>+</sup>  
Exact Mass: 375.2067

CE: 6.0  
NA-2-21 194 (3.404)

XEVO-G2TOF#YBA089  
Acq MODE: CID

09-Jul-2020 12:08:15  
Cone V: 40.0  
1: TOF MS ES+  
4.96e7

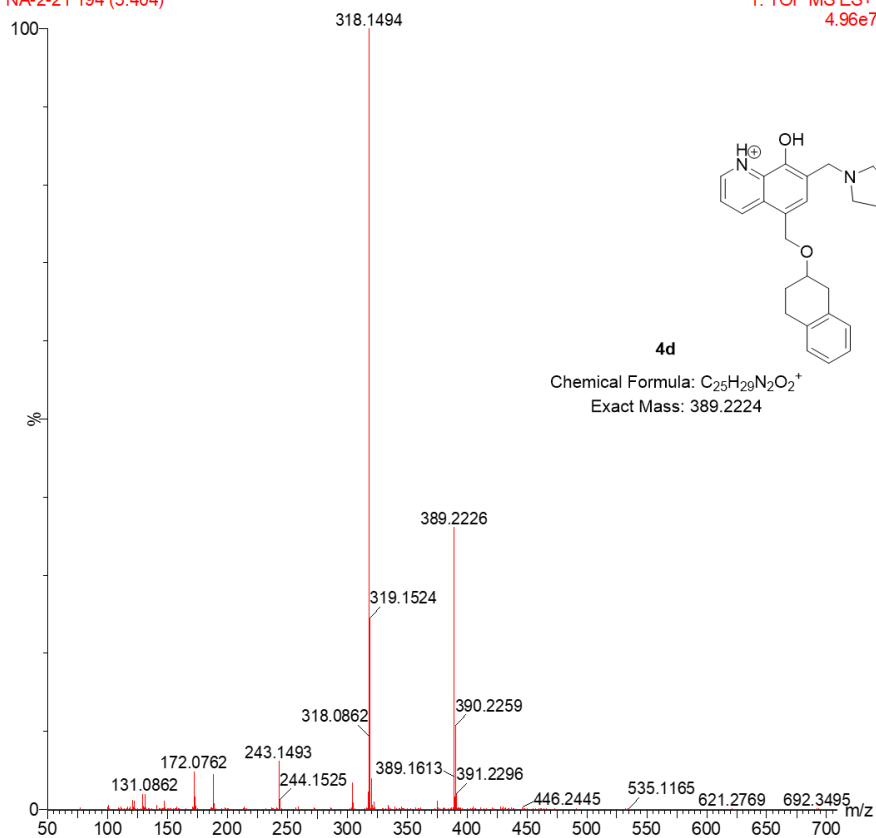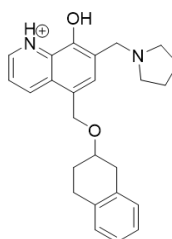

**4d**  
Chemical Formula: C<sub>25</sub>H<sub>29</sub>N<sub>2</sub>O<sub>2</sub><sup>+</sup>  
Exact Mass: 389.2224

NA-1-89 209 (3.668)

1: TOF MS ES+  
3.06e5

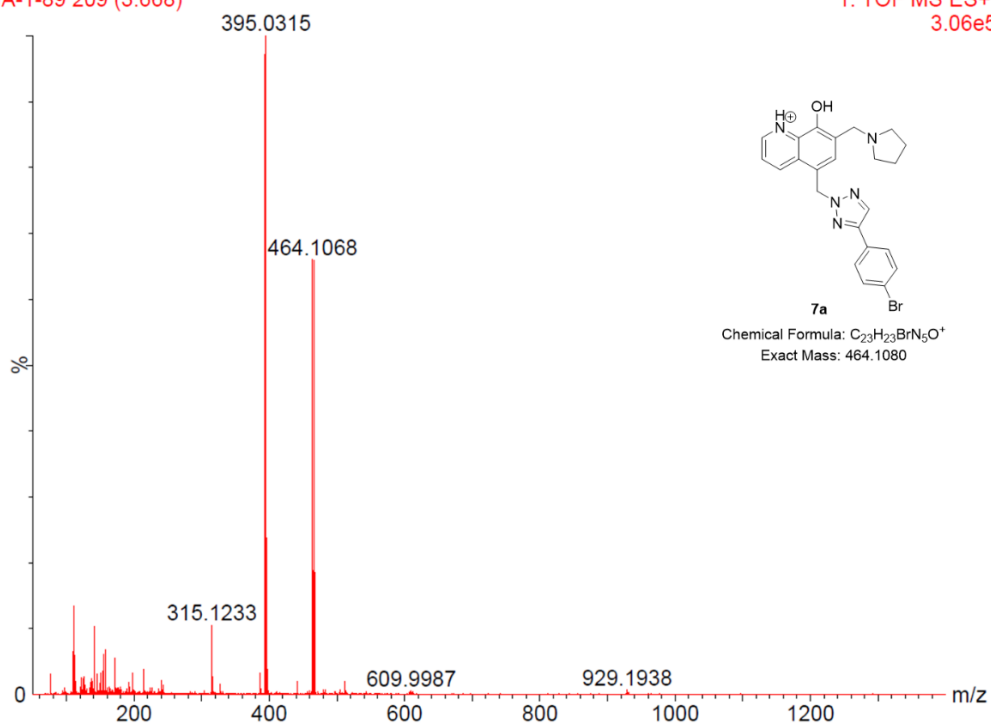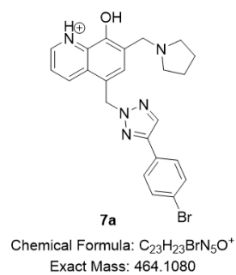

NA-1-92\_July 27 2020 207 (3.634)

1: TOF MS ES+  
1.41e6

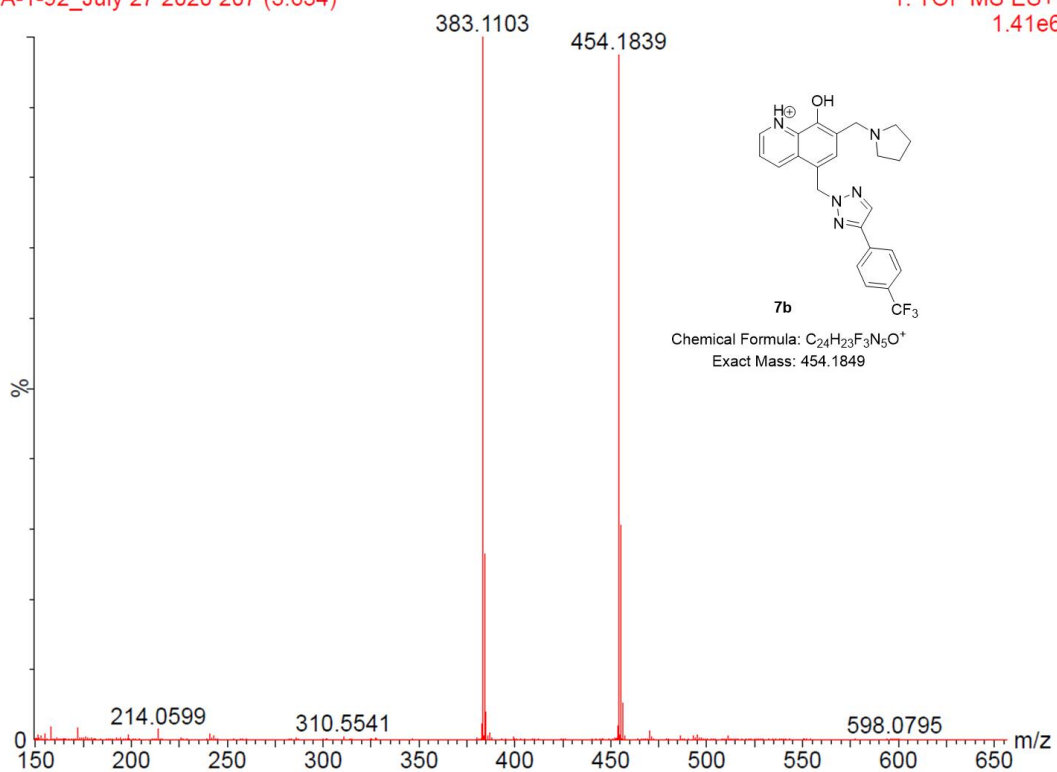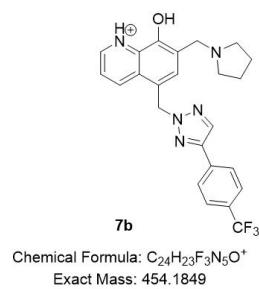

CE: 6.0  
NA-1-100 203 (3.566)

XEVO-G2QTOF#YBA089  
Acq MODE: CID

09-Jul-2020 10:22:43  
Cone V: 40.0  
1: TOF MS ES+  
9.79e7

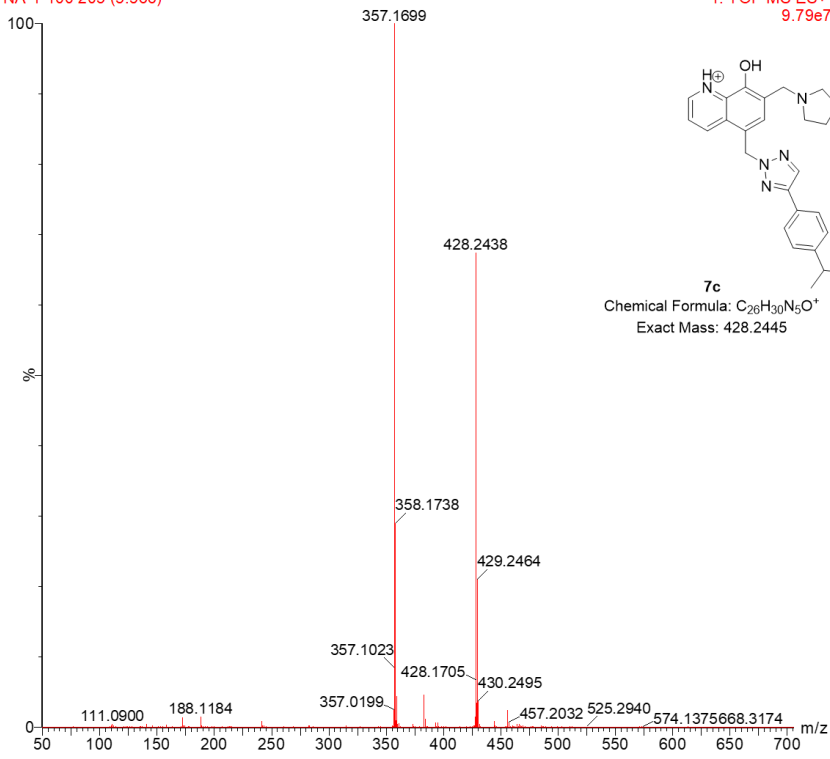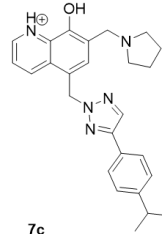

Chemical Formula: C<sub>26</sub>H<sub>30</sub>N<sub>5</sub>O<sup>+</sup>  
Exact Mass: 428.2445

CE: 6.0  
NA-1-130 99 (1.749)

XEVO-G2QTOF#YBA089  
Acq MODE: CID

09-Jul-2020 11:05:02  
Cone V: 40.0  
1: TOF MS ES+  
6.52e7

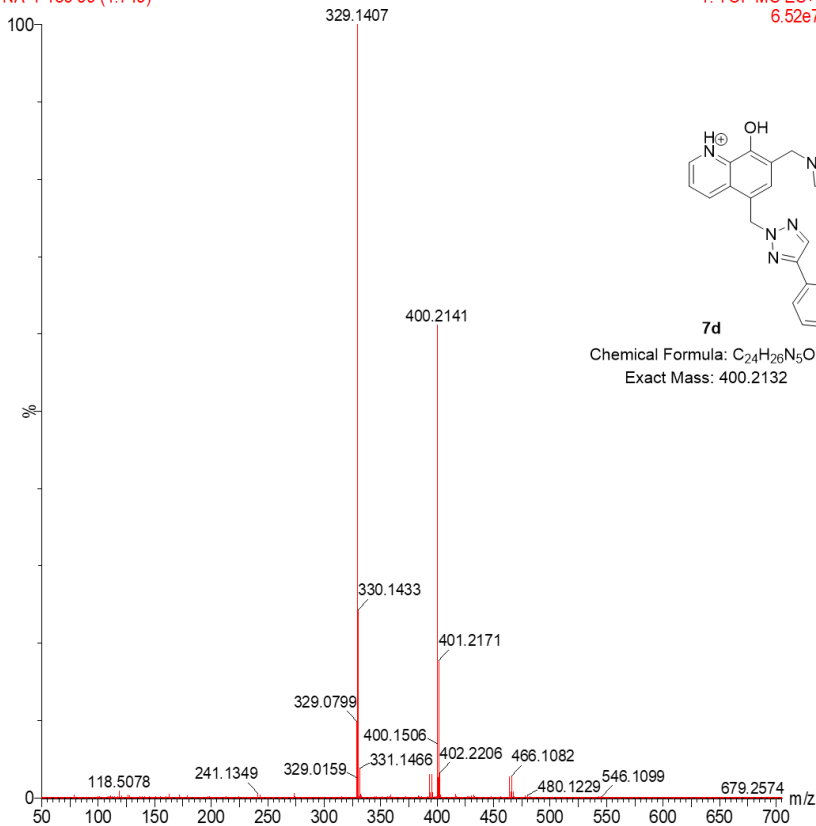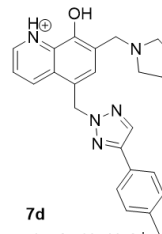

Chemical Formula: C<sub>24</sub>H<sub>26</sub>N<sub>5</sub>O<sup>+</sup>  
Exact Mass: 400.2132

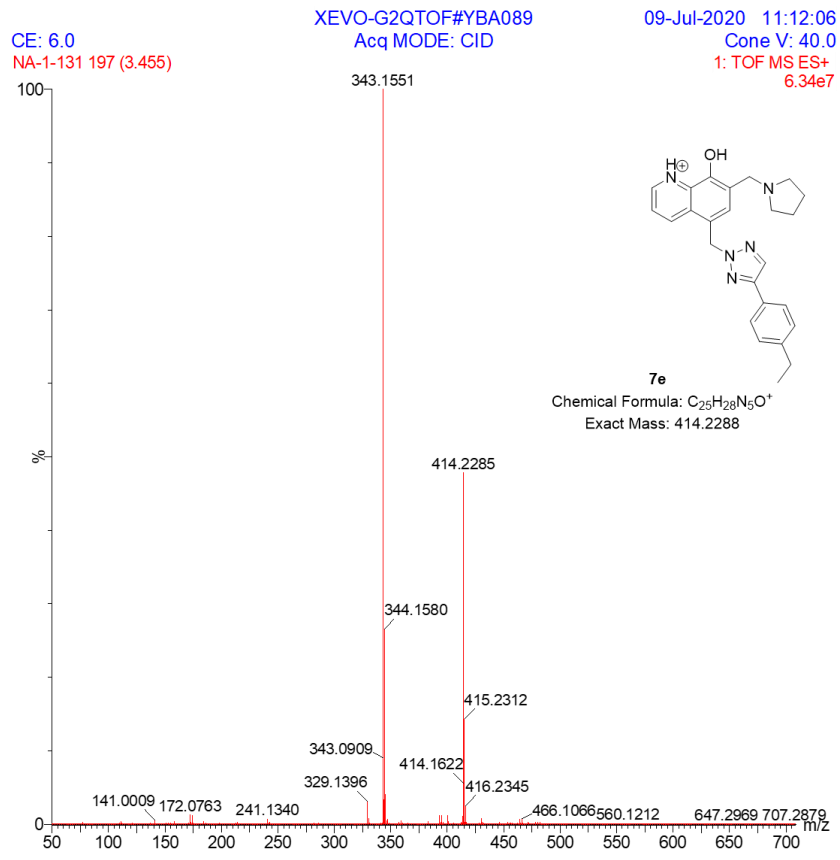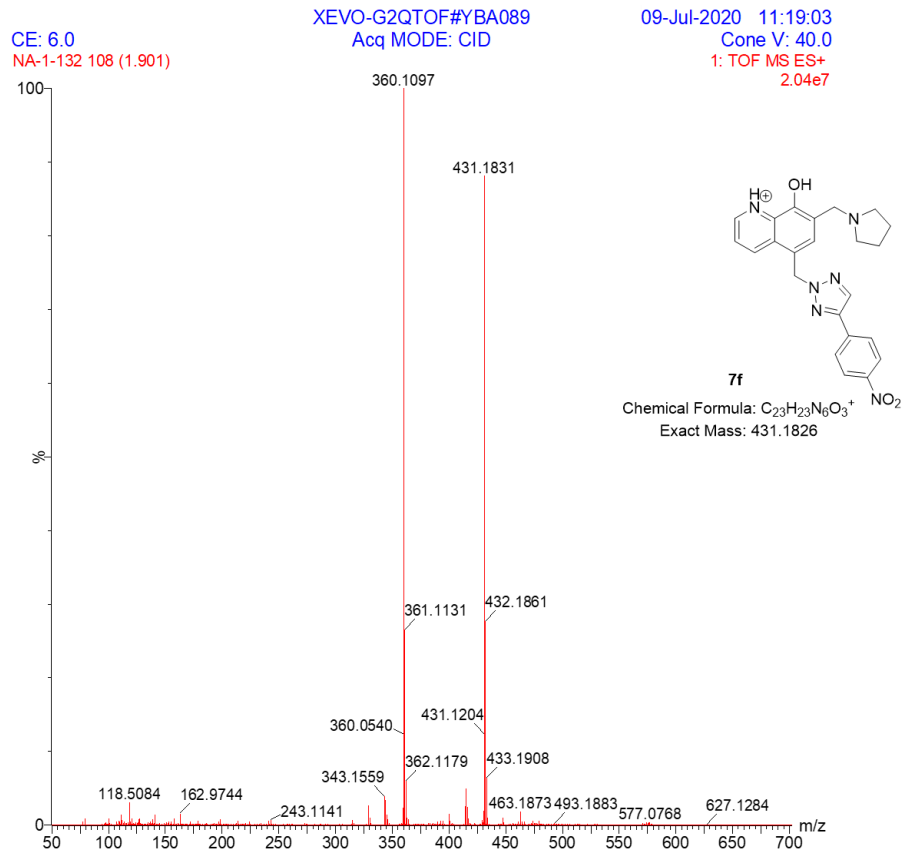



CE: 6.0  
NA-1-134 103 (1.817)

XEVO-G2QTOF#YBA089  
Acq MODE: CID

09-Jul-2020 11:26:08  
Cone V: 40.0  
1: TOF MS ES+  
6.07e7

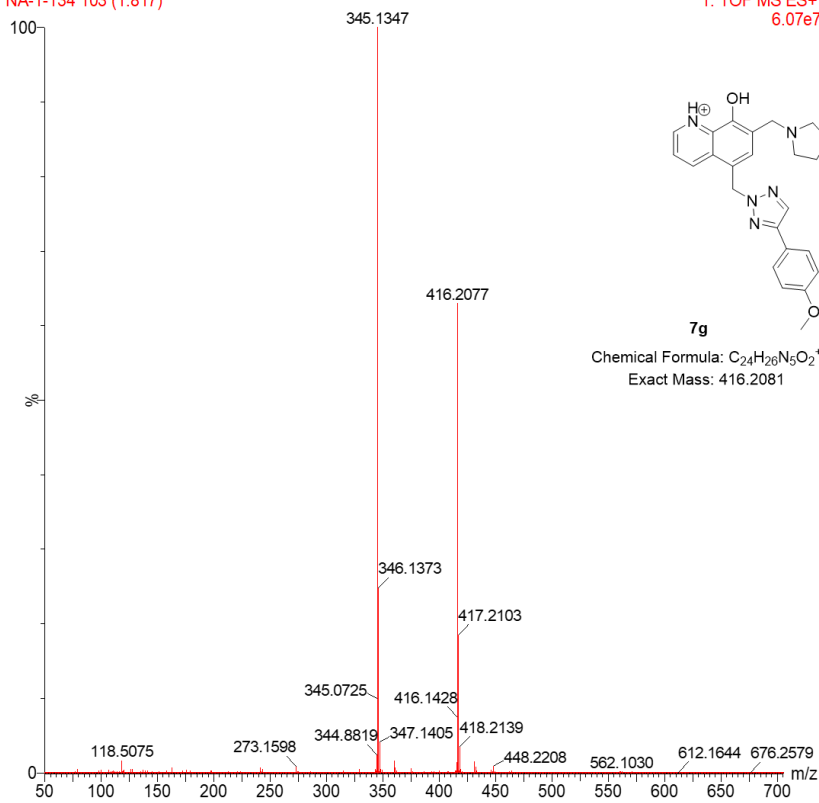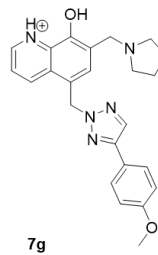

Chemical Formula: C<sub>24</sub>H<sub>26</sub>N<sub>5</sub>O<sub>2</sub><sup>+</sup>  
Exact Mass: 416.2081

CE: 6.0  
NA-2-12 101 (1.783)

XEVO-G2QTOF#YBA089  
Acq MODE: CID

09-Jul-2020 11:54:20  
Cone V: 40.0  
1: TOF MS ES+  
3.10e7

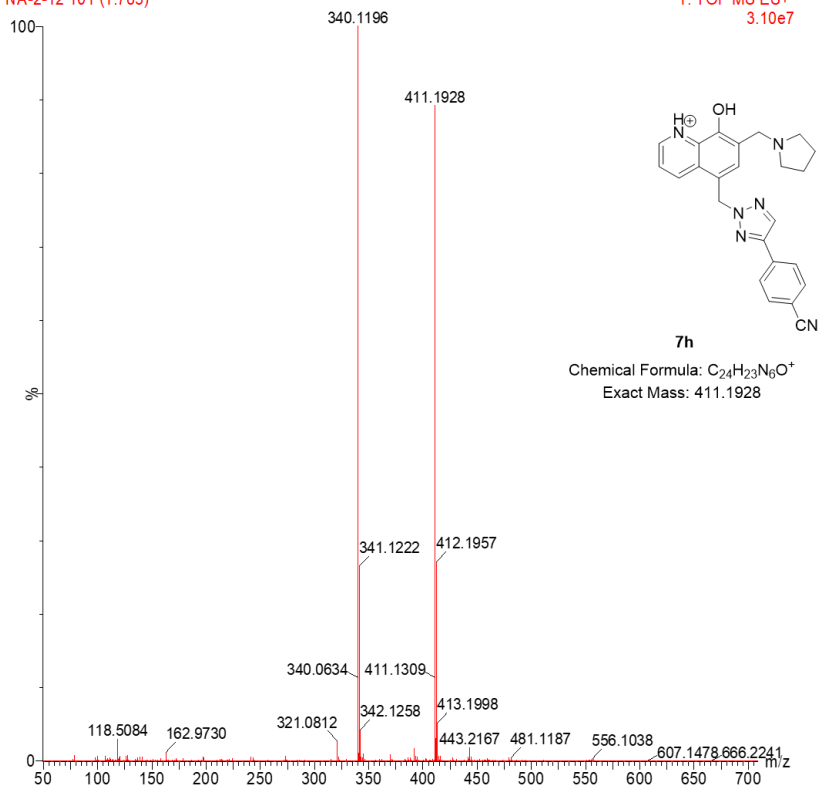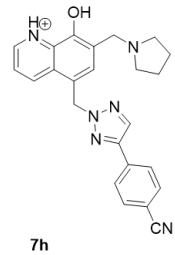

Chemical Formula: C<sub>24</sub>H<sub>23</sub>N<sub>6</sub>O<sup>+</sup>  
Exact Mass: 411.1928

CE: 6.0  
NA-2-37 209 (3.668)

XEVO-G2QTOF#YBA089  
Acq MODE: CID

09-Jul-2020 12:22:18  
Cone V: 40.0  
1: TOF MS ES+  
8.73e5

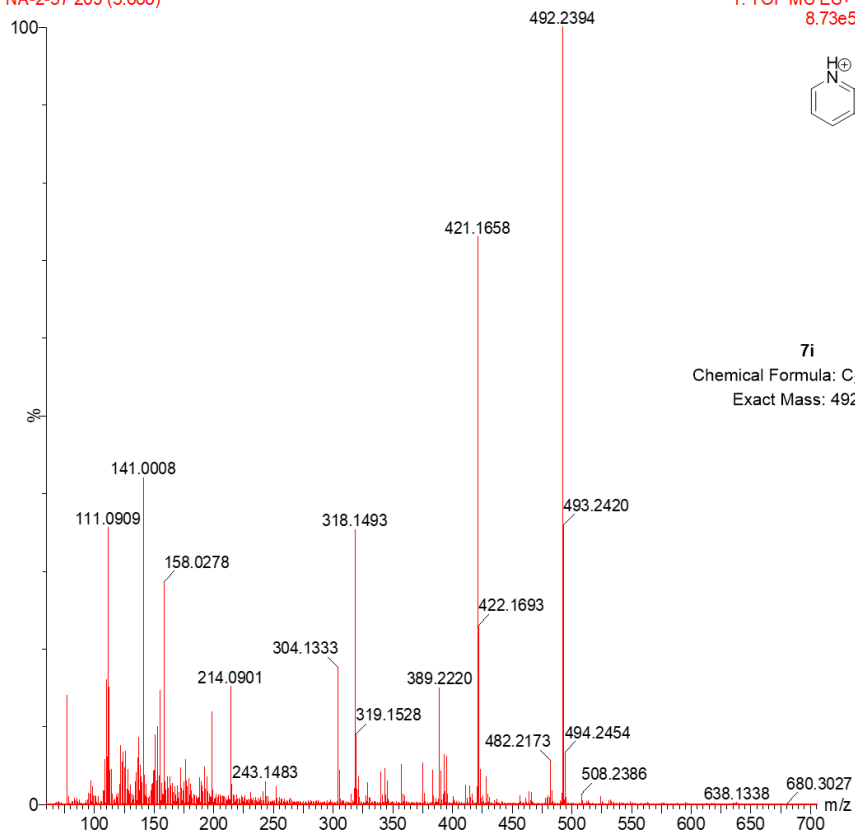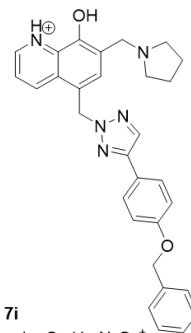

Chemical Formula: C<sub>30</sub>H<sub>30</sub>N<sub>5</sub>O<sub>2</sub><sup>+</sup>  
Exact Mass: 492.2394

NA-1-119 197 (3.455)

1: TOF MS ES+  
4.42e5

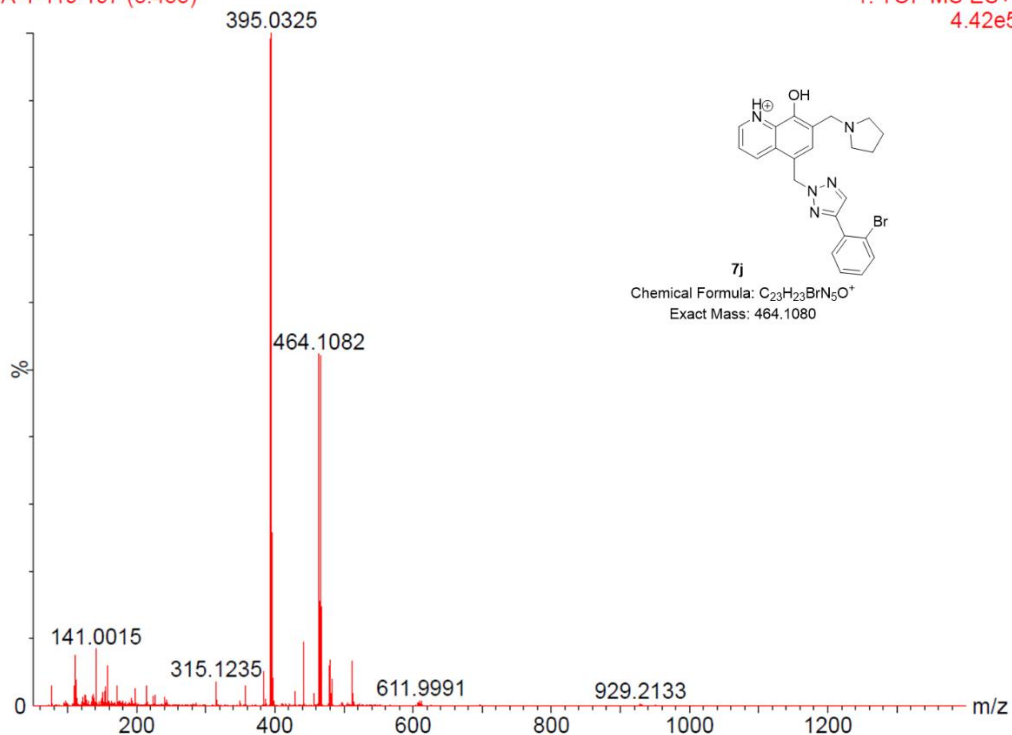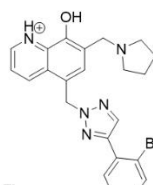

Chemical Formula: C<sub>23</sub>H<sub>23</sub>BrN<sub>5</sub>O<sup>+</sup>  
Exact Mass: 464.1080

NA-1-124 209 (3.668)

1: TOF MS ES+  
3.14e5

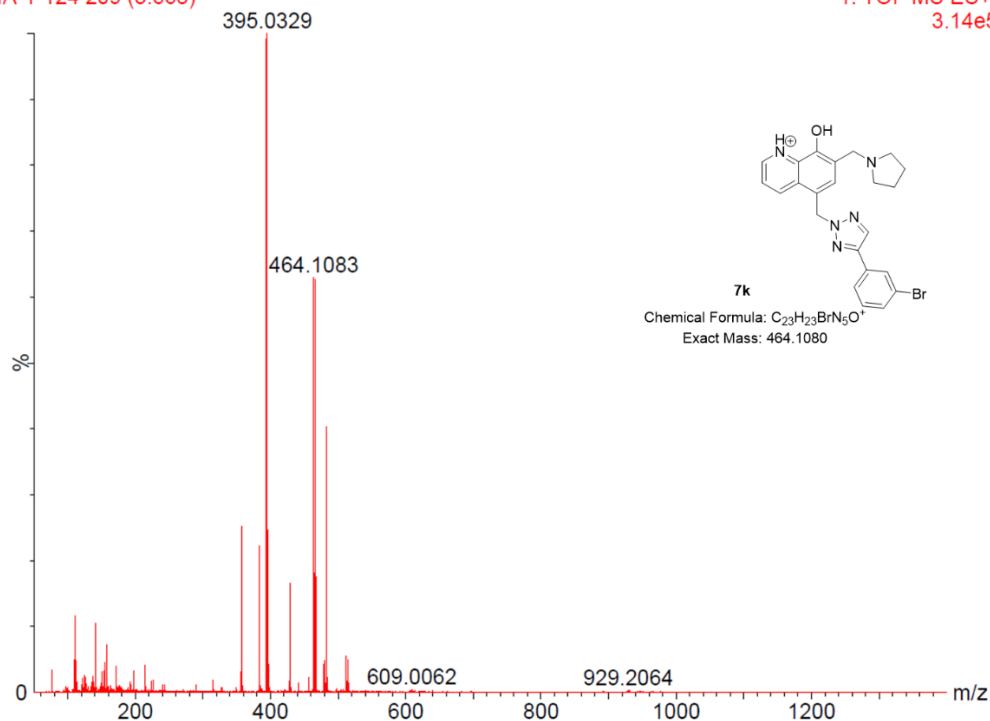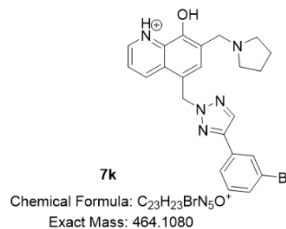

CE: 6.0

XEVO-G2QTOF#YBA089  
Acq MODE: CID

09-Jul-2020 11:40:10  
Cone V: 40.0

NA-1-148 107 (1.885)

1: TOF MS ES+  
6.21e7

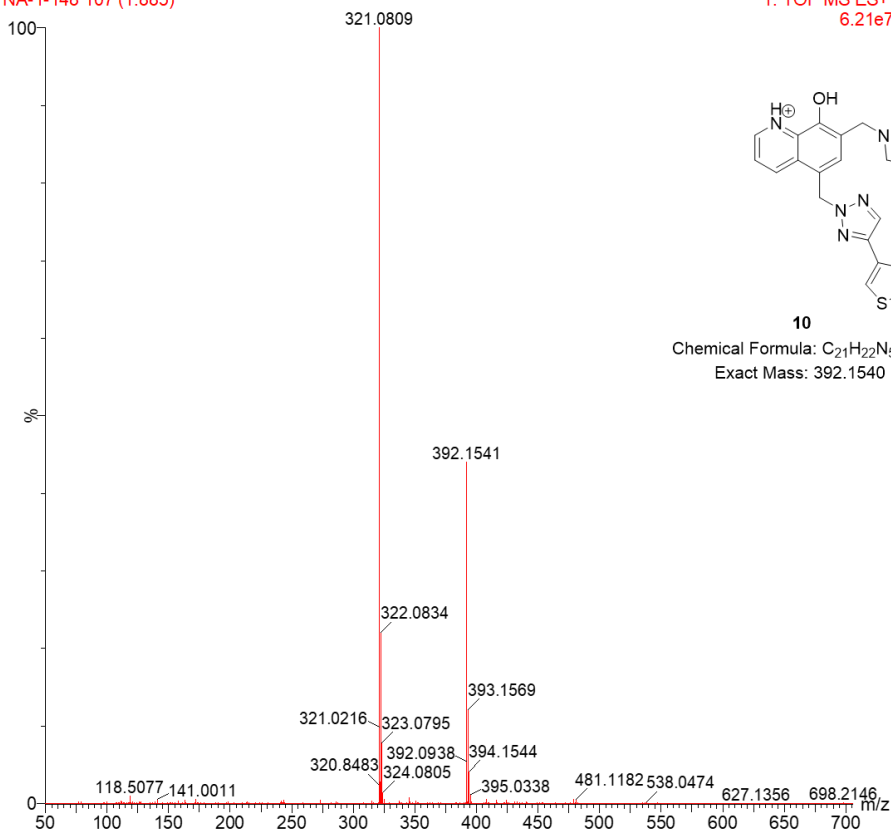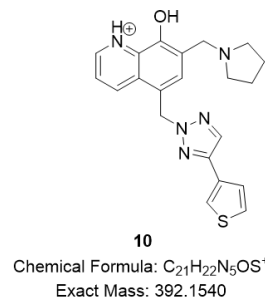

NA-1-112 217 (3.813)

1: TOF MS ES+  
1.22e5

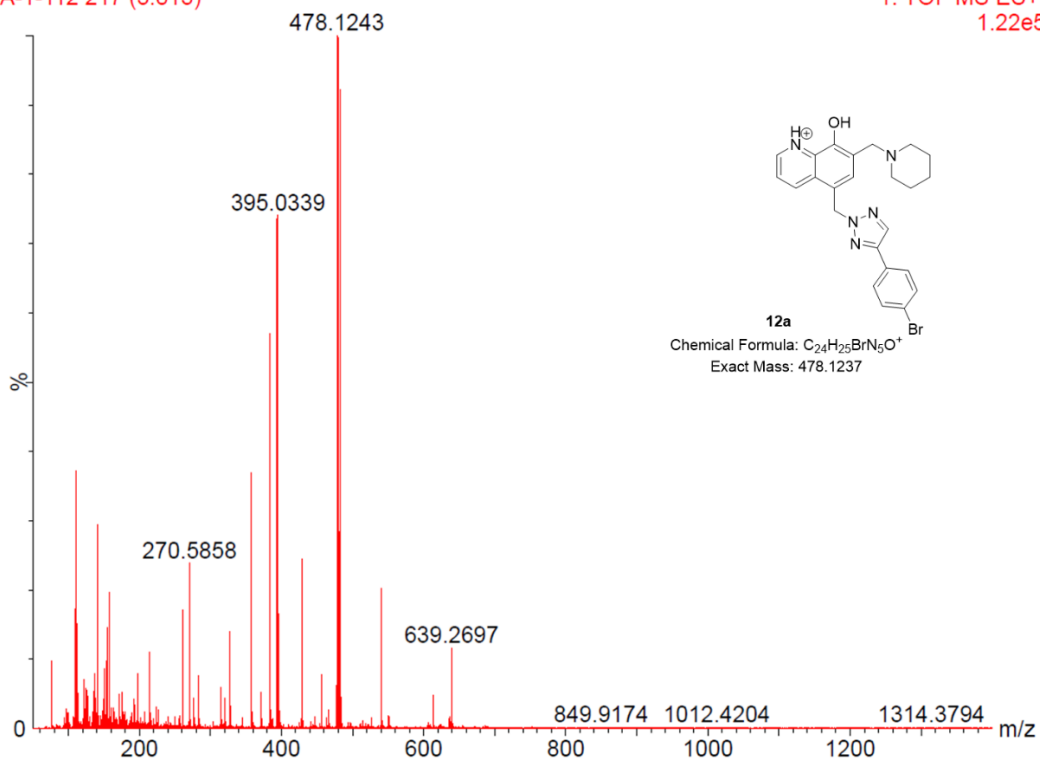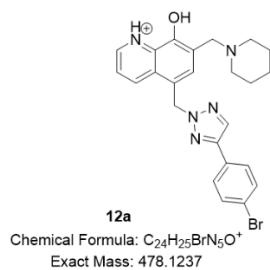

NA-1-94\_July 27 2020 208 (3.651)

1: TOF MS ES+  
2.27e6

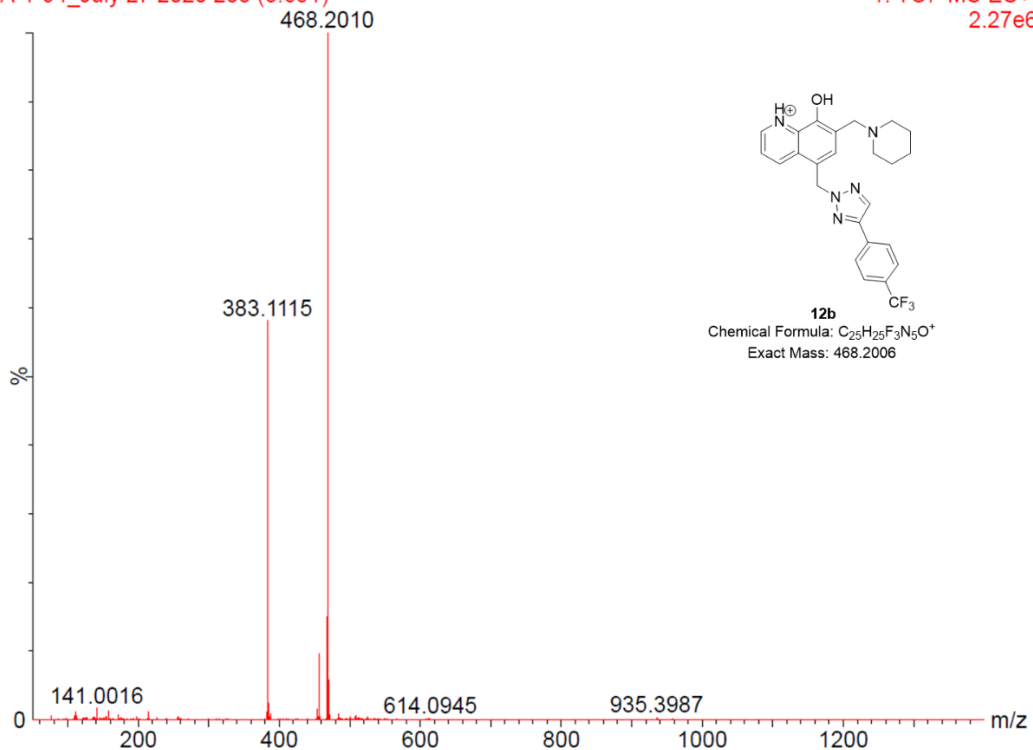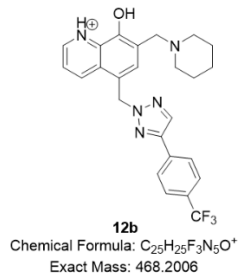

CE: 6.0  
NA-1-104 204 (3.583)

XEVO-G2QTOF#YBA089  
Acq MODE: CID

09-Jul-2020 10:29:43  
Cone V: 40.0  
1: TOF MS ES+  
9.31e7

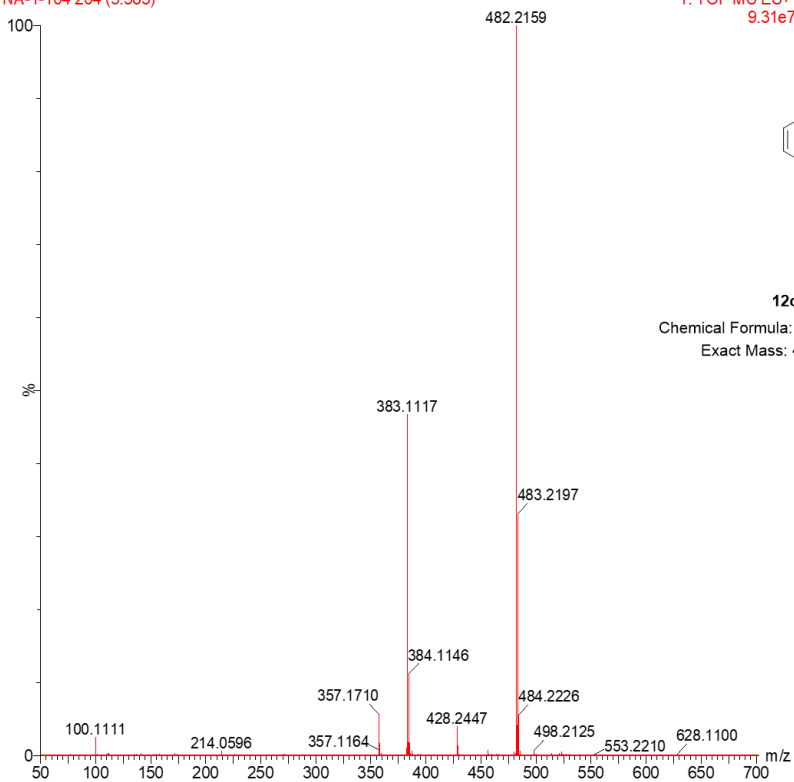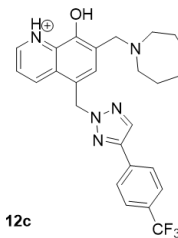

Chemical Formula:  $C_{26}H_{27}F_3N_5O^+$   
Exact Mass: 482.2162

CE: 6.0  
NA-1-93 200 (3.516)

XEVO-G2QTOF#YBA089  
Acq MODE: CID

09-Jul-2020 10:15:45  
Cone V: 40.0  
1: TOF MS ES+  
8.99e7

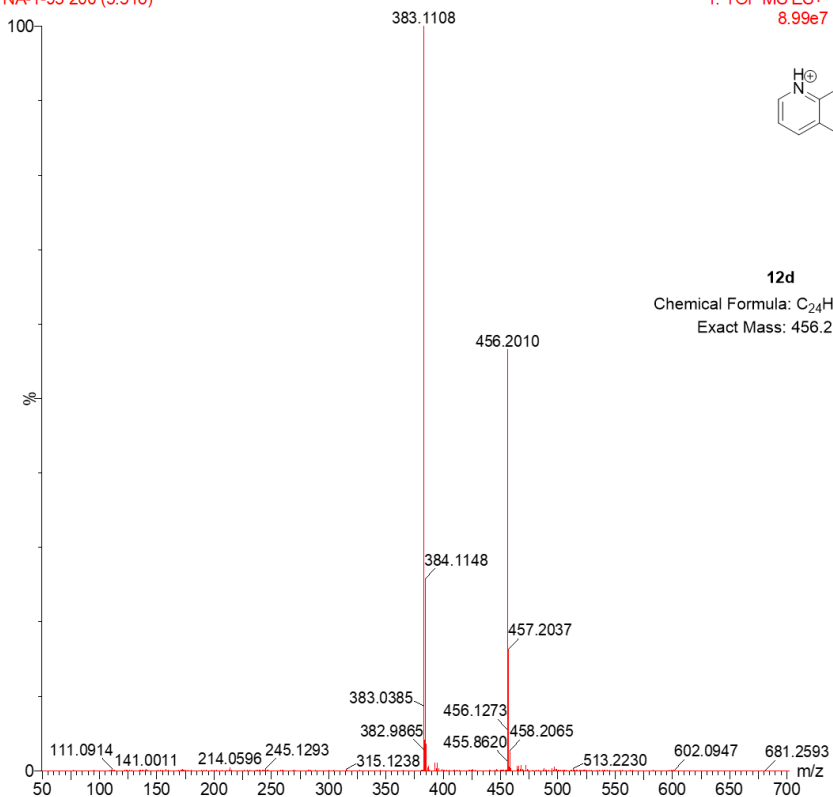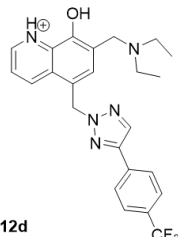

Chemical Formula:  $C_{24}H_{25}F_3N_5O^+$   
Exact Mass: 456.2006

NA-1-114\_July 27 2020 192 (3.370)

1: TOF MS ES+  
3.34e5

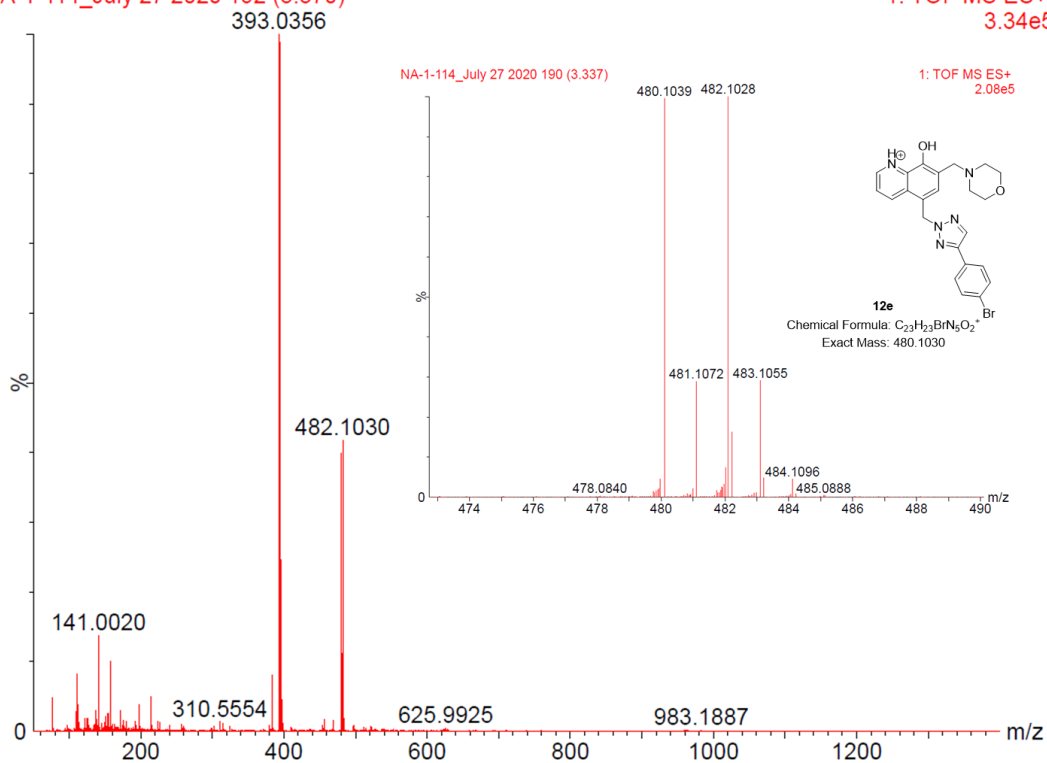

NA-1-146 110 (1.945)

1: TOF MS ES+  
1.09e5

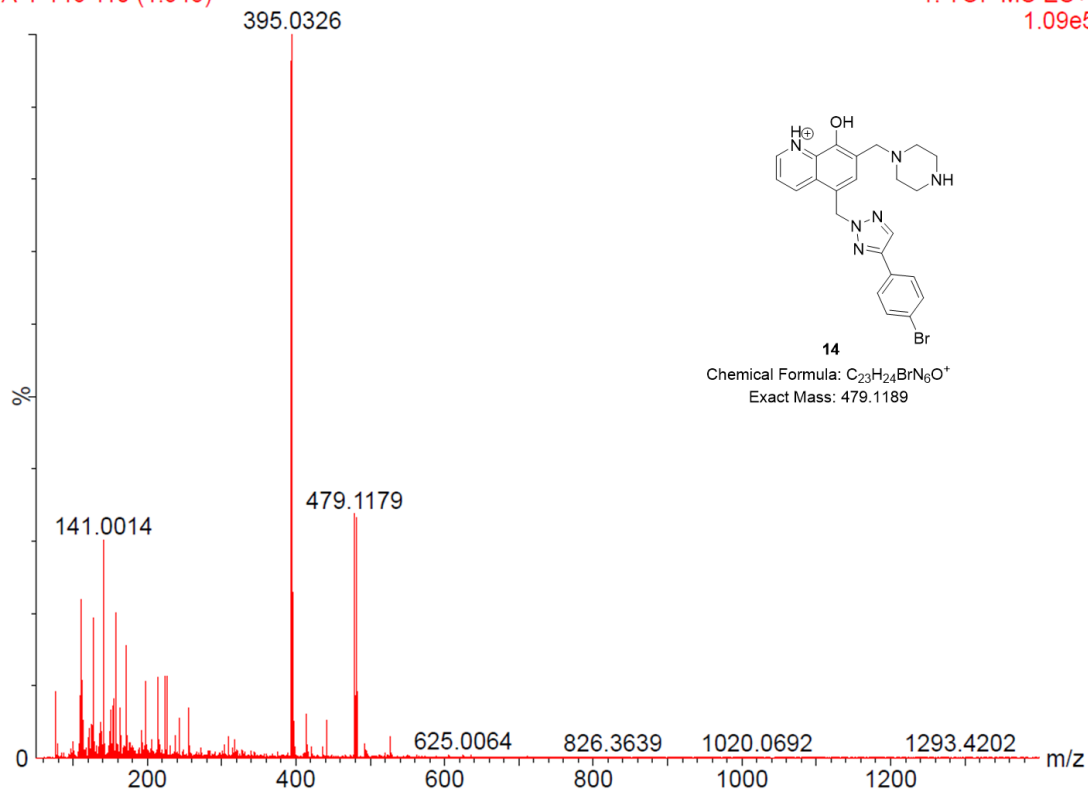

NA-2-5 292 (5.120)

1: TOF MS ES+  
1.19e6

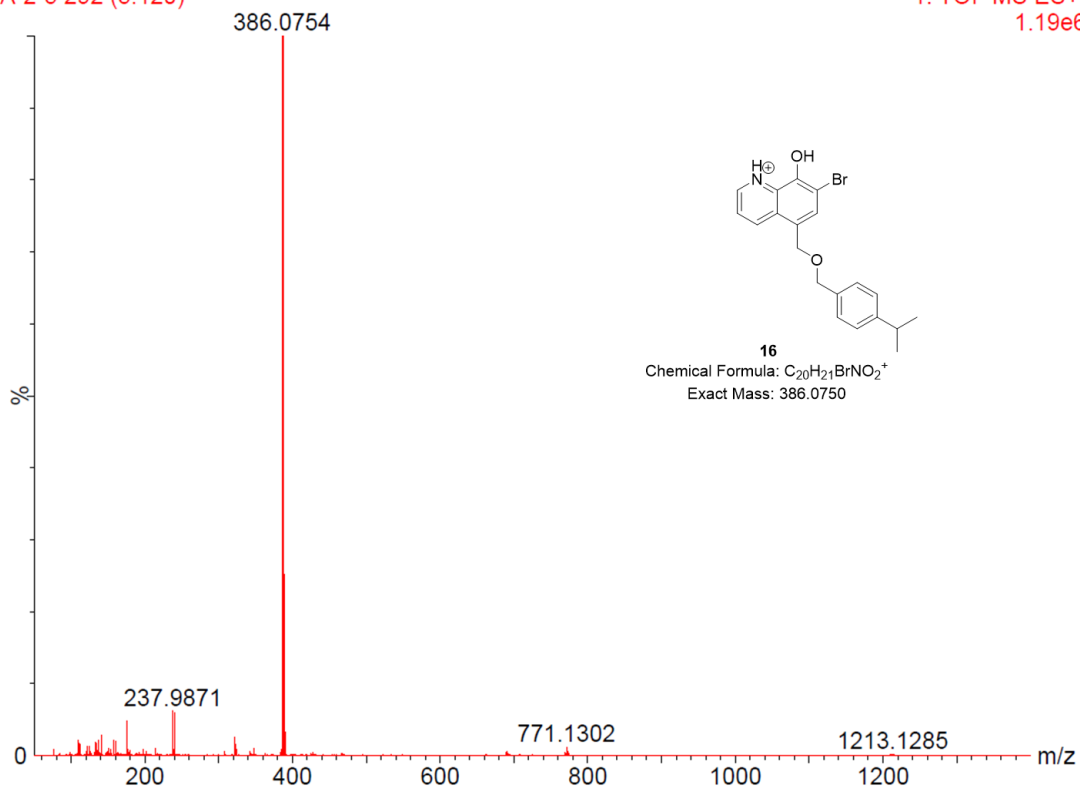

NA-2-1\_July 27 2020 304 (5.323)

1: TOF MS ES+  
1.50e6

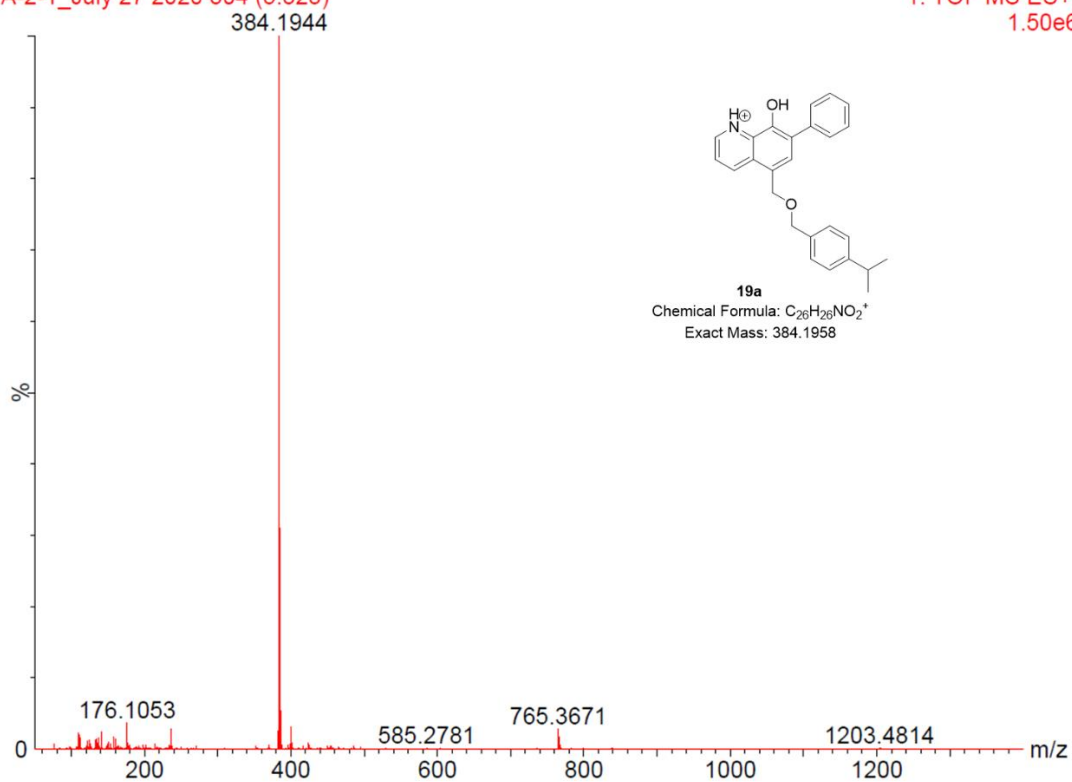

CE: 6.0  
NA-2-31 266 (4.661)

XEVO-G2QTOF#YBA089  
Acq MODE: CID

09-Jul-2020 12:15:13  
Cone V: 40.0  
1: TOF MS ES+  
1.33e6

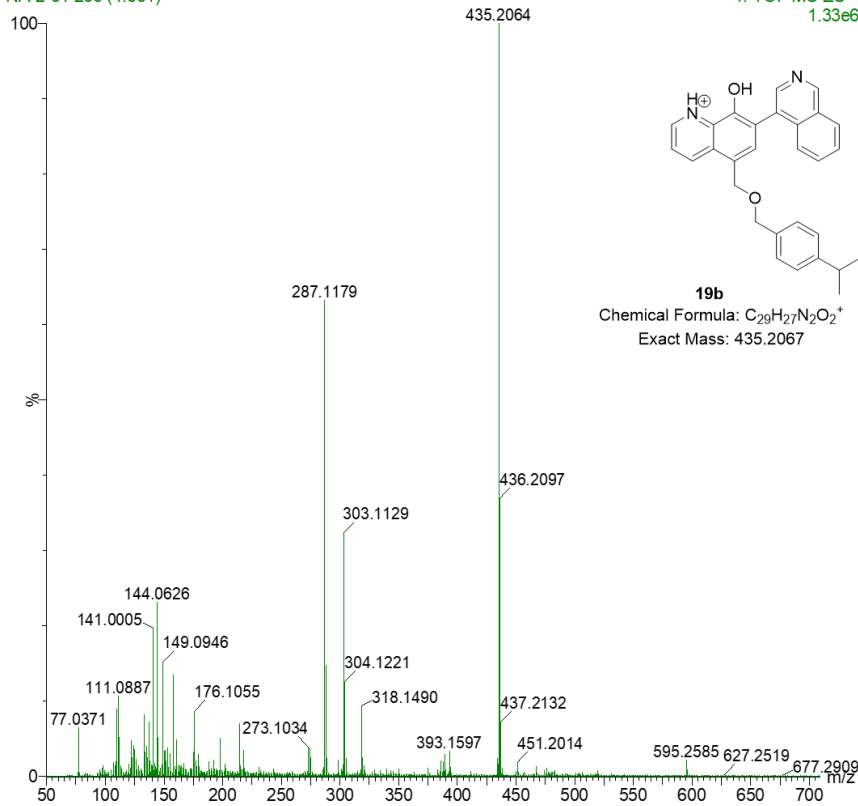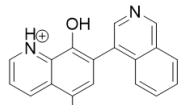

**19b**

Chemical Formula:  $C_{29}H_{27}N_2O_2^+$   
Exact Mass: 435.2067

CE: 6.0  
NA-2-43 275 (4.823)

XEVO-G2QTOF#YBA089  
Acq MODE: CID

09-Jul-2020 12:29:16  
Cone V: 40.0  
1: TOF MS ES+  
6.34e7

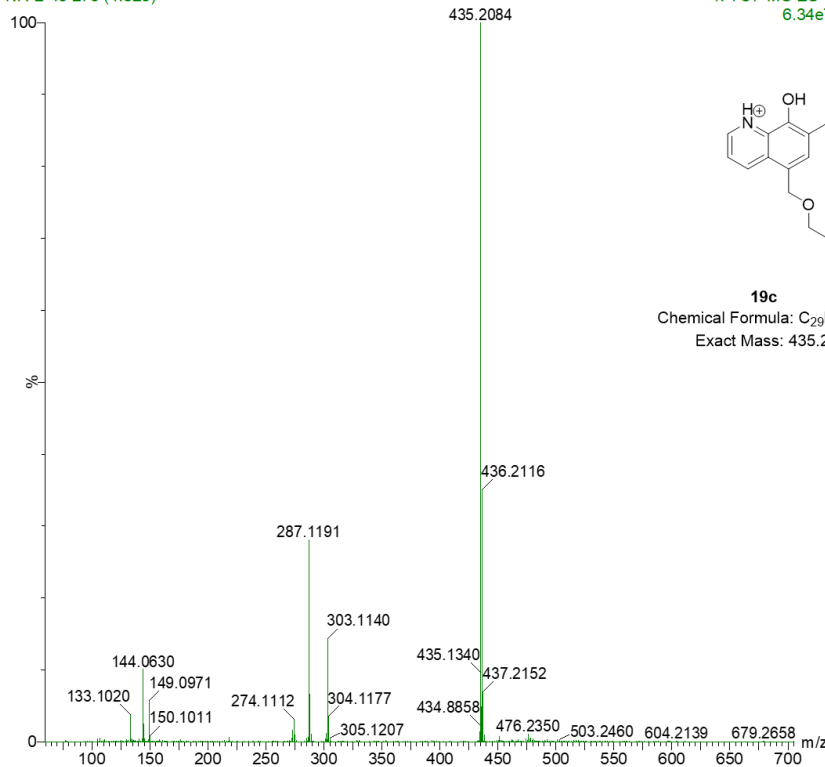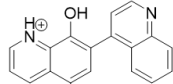

**19c**

Chemical Formula:  $C_{29}H_{27}N_2O_2^+$   
Exact Mass: 435.2067



CE: 6.0  
NA-2-62 305 (5.340)

XEVO-G2QTOF#YBA089  
Acq MODE: CID

09-Jul-2020 12:36:14  
Cone V: 40.0  
1: TOF MS ES+  
4.90e7

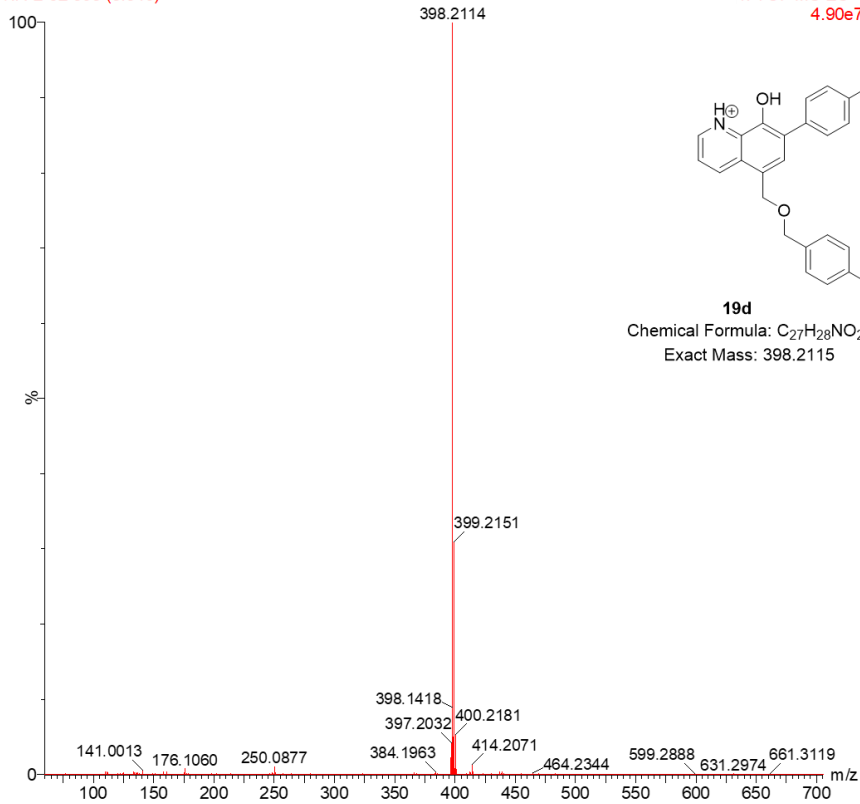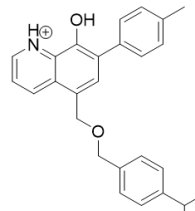

**19d**  
Chemical Formula: C<sub>27</sub>H<sub>28</sub>NO<sub>2</sub><sup>+</sup>  
Exact Mass: 398.2115

CE: 6.0  
NA-2-76 305 (5.340)

XEVO-G2QTOF#YBA089  
Acq MODE: CID

09-Jul-2020 13:18:21  
Cone V: 40.0  
1: TOF MS ES+  
3.28e7

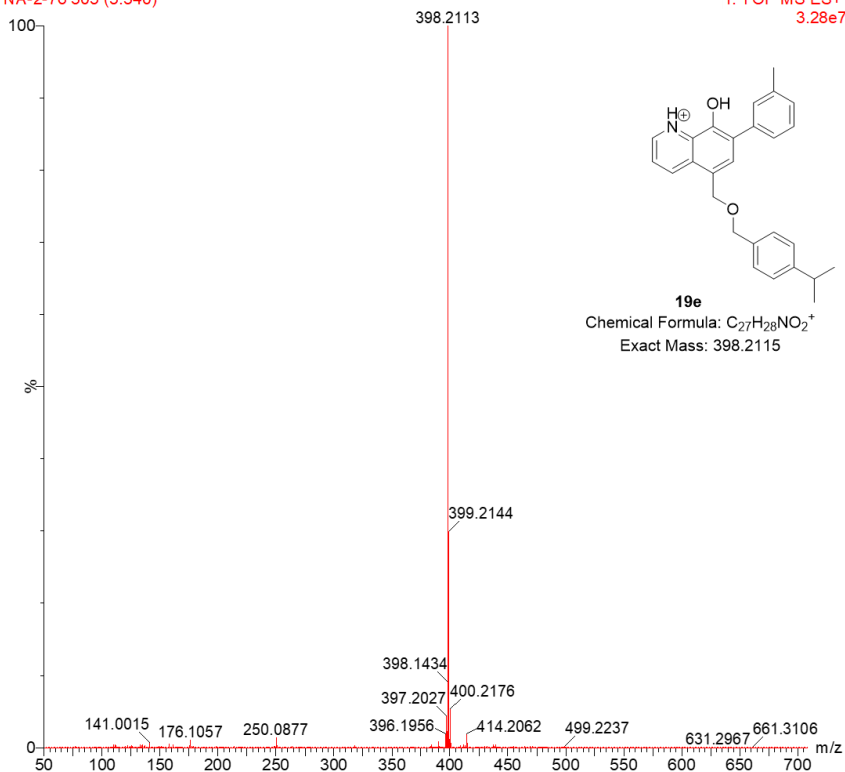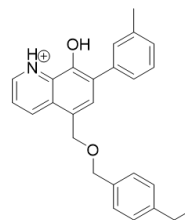

**19e**  
Chemical Formula: C<sub>27</sub>H<sub>28</sub>NO<sub>2</sub><sup>+</sup>  
Exact Mass: 398.2115

CE: 6.0  
NA-2-63 296 (5.187)

XEVO-G2QTOF#YBA089  
Acq MODE: CID

09-Jul-2020 12:43:11  
Cone V: 40.0  
1: TOF MS ES+  
3.73e7

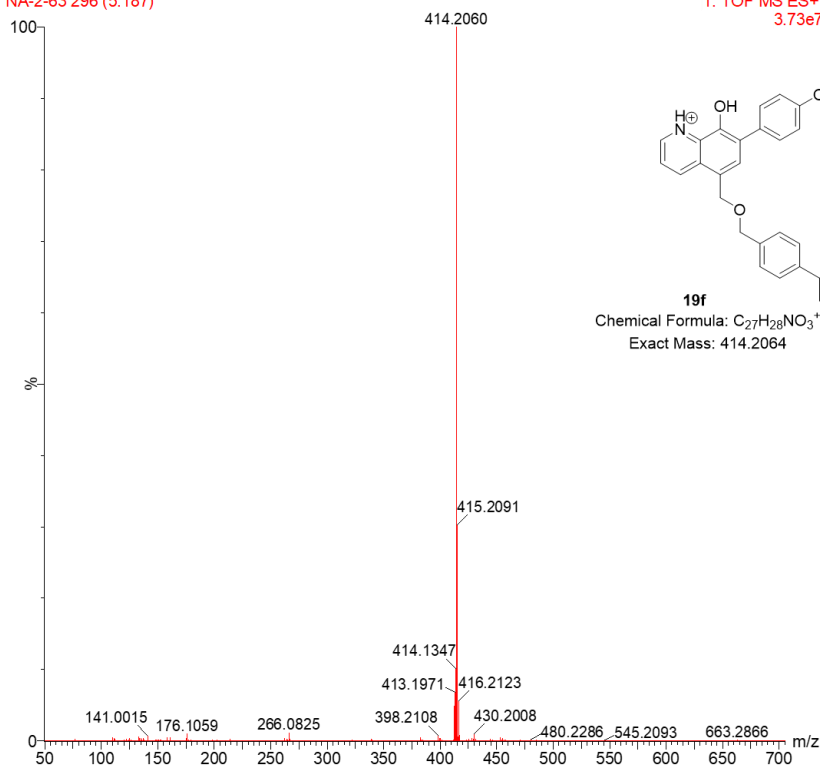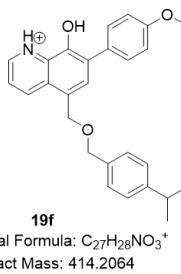

CE: 6.0  
NA-2-80 305 (5.340)

XEVO-G2QTOF#YBA089  
Acq MODE: CID

09-Jul-2020 13:25:27  
Cone V: 40.0  
1: TOF MS ES+  
2.75e7

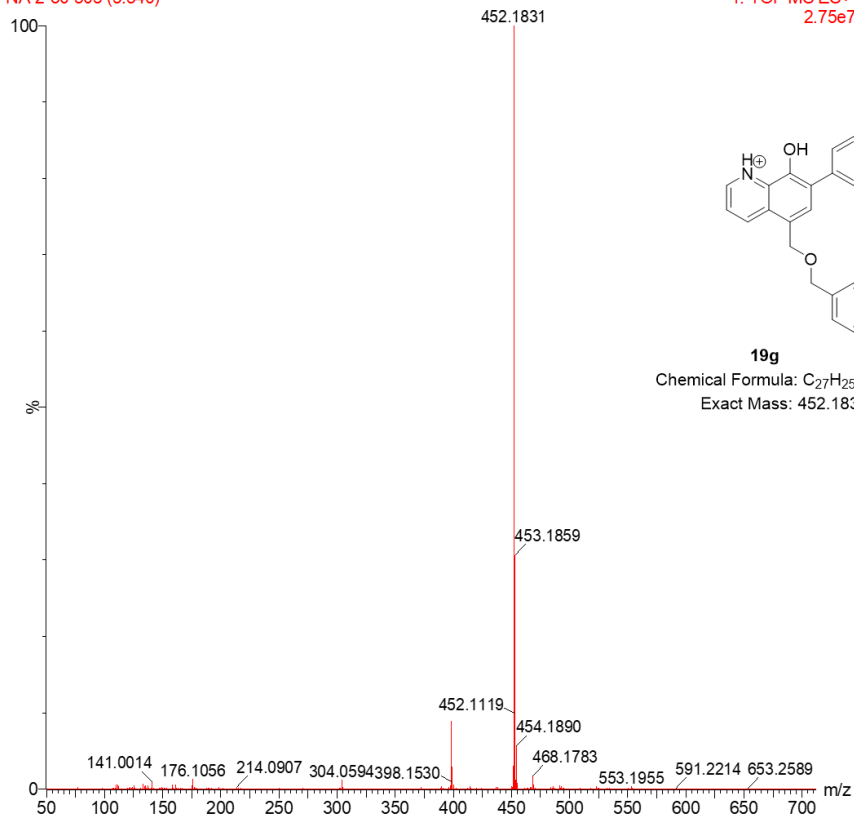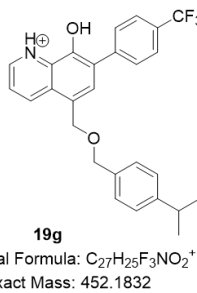

CE: 6.0  
NA-2-65 300 (5.255)

XEVO-G2QTOF#YBA089  
Acq MODE: CID

09-Jul-2020 13:11:24  
Cone V: 40.0  
1: TOF MS ES+  
2.77e7

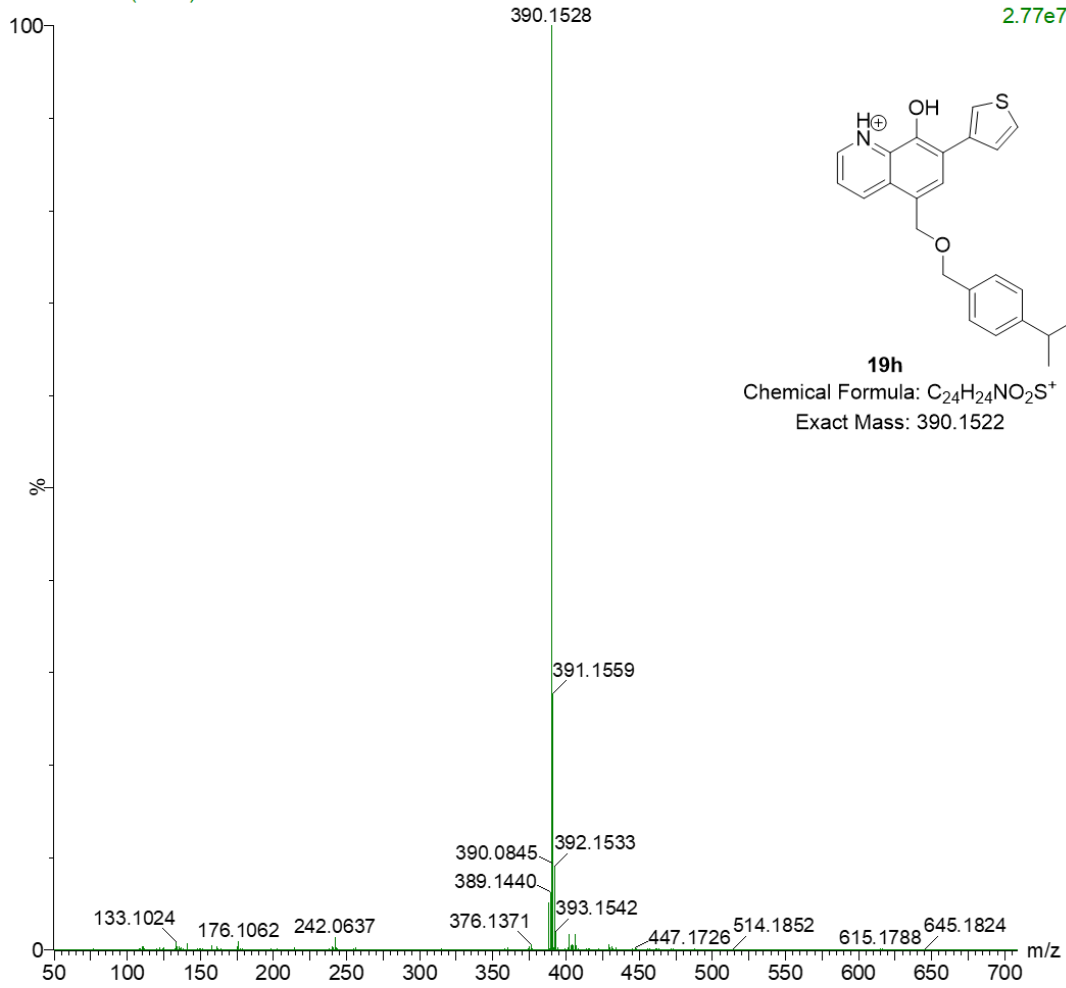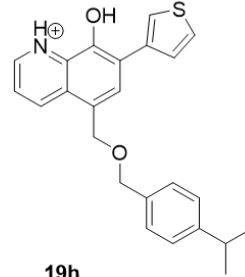

Chemical Formula: C<sub>24</sub>H<sub>24</sub>NO<sub>2</sub>S<sup>+</sup>  
Exact Mass: 390.1522

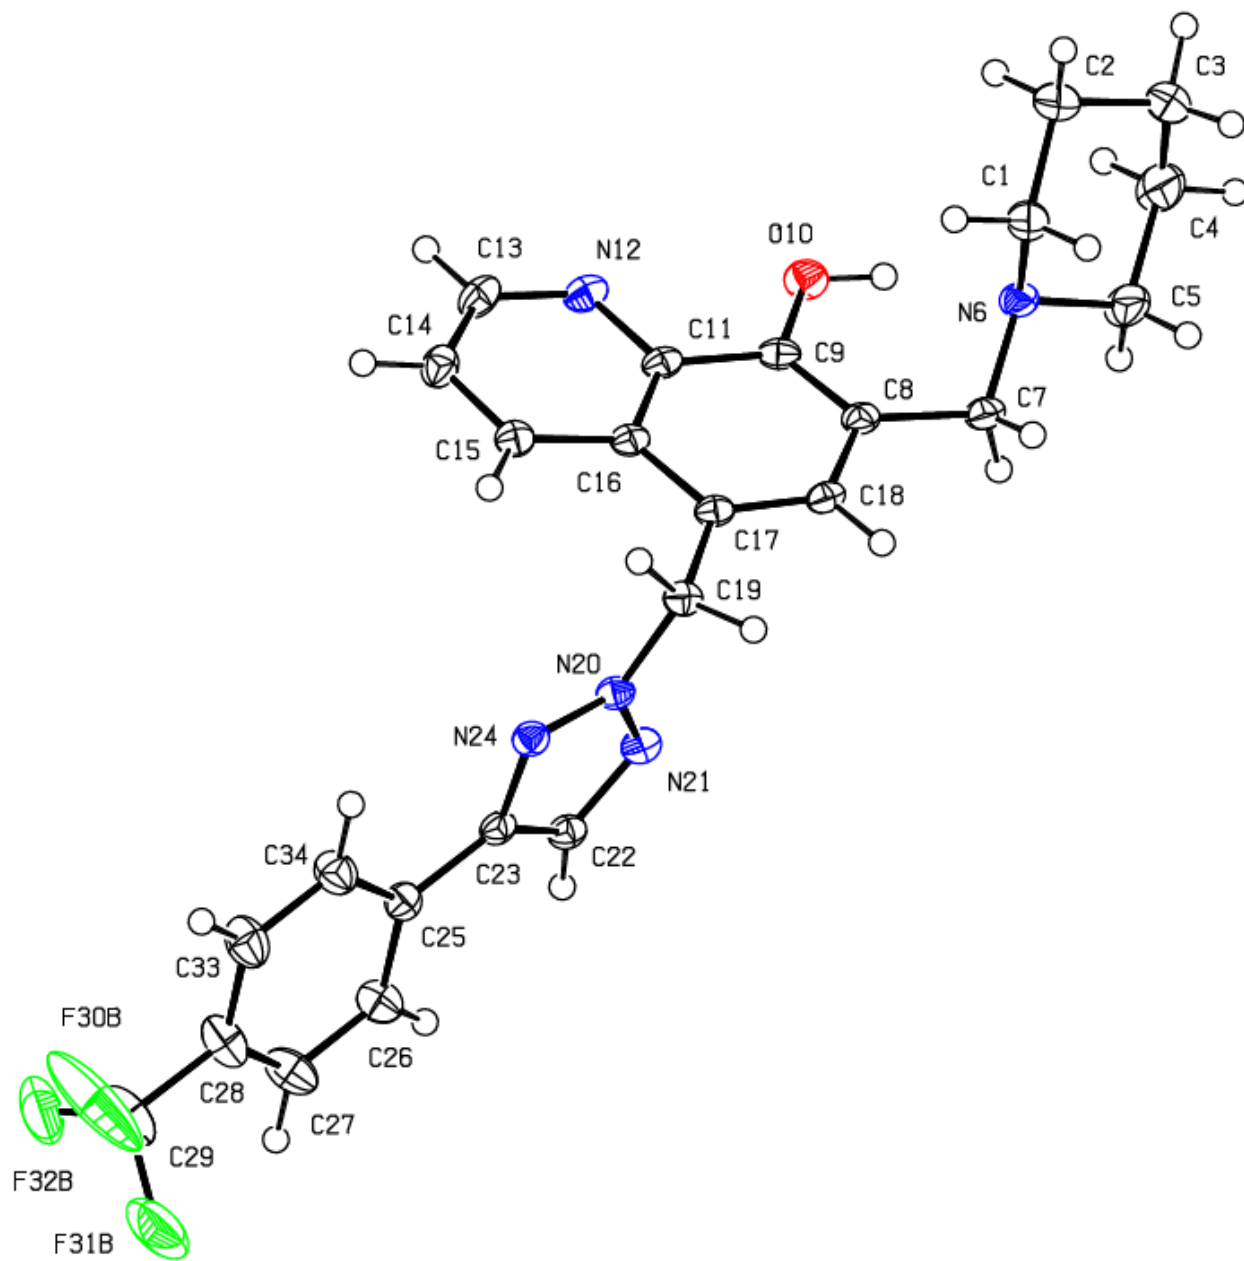

**Supplementary Figure S1:** Labeled thermal ellipsoid plot for **12b**.

**Table S1:** Chemical and crystal data for **12b**.

---

|                                                                                                                |                                                                 |
|----------------------------------------------------------------------------------------------------------------|-----------------------------------------------------------------|
| <i>Chemical formula</i>                                                                                        | C <sub>25</sub> H <sub>24</sub> F <sub>3</sub> N <sub>5</sub> O |
| <i>Formula weight, Da</i>                                                                                      | 467.49                                                          |
| <i>Temperature, K</i>                                                                                          | 100(2)                                                          |
| <i>Crystal description</i>                                                                                     | colourless plate                                                |
| <i>Crystal size, mm</i>                                                                                        | 0.641 x 0.231 x 0.058                                           |
| <i>Crystal system</i>                                                                                          | triclinic                                                       |
| <i>Space group</i>                                                                                             | P $\bar{1}$                                                     |
| <i>Unit cell dimensions, from 9869 reflections having <math>2.29^\circ \leq \theta \leq 68.29^\circ</math></i> |                                                                 |
| <i>a, Å</i>                                                                                                    | 5.9682(2)                                                       |
| <i>b, Å</i>                                                                                                    | 10.0184(3)                                                      |
| <i>c, Å</i>                                                                                                    | 19.3660(7)                                                      |
| <i><math>\alpha</math>, °</i>                                                                                  | 93.6960(10)                                                     |
| <i><math>\beta</math>, °</i>                                                                                   | 92.7200(10)                                                     |
| <i><math>\gamma</math>, °</i>                                                                                  | 94.7610(10)                                                     |
| <i>Volume, Å<sup>3</sup></i>                                                                                   | 1149.91(7)                                                      |
| <i>Z</i>                                                                                                       | 2                                                               |
| <i>Density (calculated), g/cm<sup>3</sup></i>                                                                  | 1.350                                                           |
| <i>Absorption coefficient, mm<sup>-1</sup></i>                                                                 | 0.857                                                           |
| <i>F(000)</i>                                                                                                  | 488                                                             |

---

**Table S2:** Data collection, structure solution, and refinement.

---

|                                                                      |                                                                             |
|----------------------------------------------------------------------|-----------------------------------------------------------------------------|
| <i>X-ray wavelength, Å</i>                                           | 1.54178                                                                     |
| <i>Theta range for data integration</i>                              | 2.289 to 68.289°                                                            |
| <i>Index ranges</i>                                                  | $-7 \leq h \leq 7, -10 \leq k \leq 12, -23 \leq l \leq 23$                  |
| <i>Reflections collected</i>                                         | 17177                                                                       |
| <i>Independent reflections</i>                                       | 4153 ( $R_{int} = 0.0392$ )                                                 |
| <i>Observed reflections (<math>I &gt; 2\sigma(I)</math>)</i>         | 3830                                                                        |
| <i>Coverage of independent reflections</i>                           | 98.6%                                                                       |
| <i>Absorption correction method</i>                                  | numerical                                                                   |
| <i>Max. and min. transmission</i>                                    | 1.0000 and 0.6918                                                           |
| <i>Structure solution technique</i>                                  | dual-space method                                                           |
| <i>Structure solution program</i>                                    | SHELXT (Sheldrick, 2016)                                                    |
| <i>Refinement method</i>                                             | full-matrix least-squares on $F^2$                                          |
| <i>Refinement program</i>                                            | SHELXL-2018/3 (Sheldrick, 2018)                                             |
| <i>Function minimized</i>                                            | $\Sigma w(F_o^2 - F_c^2)^2$                                                 |
| <i>Weighting scheme</i>                                              | $w=1/[\sigma^2(F_o^2)+(0.0489P)^2+0.3954P]$ , where<br>$P=(F_o^2+2F_c^2)/3$ |
| <i>Data / restraints / parameters</i>                                | 4153 / 63 / 339                                                             |
| <i>Goodness-of-fit on <math>F^2</math></i>                           | 1.049                                                                       |
| <i>Final residuals</i>                                               |                                                                             |
| <i>observed data</i>                                                 | $R1 = 0.0379, wR2 = 0.0966$                                                 |
| <i>all data</i>                                                      | $R1 = 0.0407, wR2 = 0.0994$                                                 |
| <i>Largest difference peak and hole, <math>e^-/\text{Å}^3</math></i> | 0.279 and -0.251                                                            |
| <i>R.M.S. deviation from mean, <math>e^-/\text{Å}^3</math></i>       | 0.051                                                                       |

---
